# Supplementary material for: Direct inhibition of Keap1–Nrf2 interaction by egg-derived peptides DKK and DDW revealed by molecular docking and fluorescence polarization
Source: Royal Society of Chemistry journal article supplement (doi:10.1039/c7ra04352j), 2017-01-01
Supplement: c7ra04352j1.xlsx [file c7ra04352j1.xlsx]

## Sheet: Sheet1
Index	Protein
	Ovalbumin		Ovalbumin-related protein X		Ovalbumin-related protein Y		Ovalbumin-related protein Y		Ovalbumin-related protein Y		Ovotransferrin		Ovotransferrin		Ovotransferrin		Ovotransferrin		Ovotransferrin		Ovotransferrin		Ovotransferrin		Ovotransferrin		Ovomucoid		Ovomucoid		Ovoglobulin G2		Ovoglobulin G2		OvoglobulinG2 type AA		OvoglobulinG2 type AB		OvoglobulinG3 type AB		OvoglobulinG4 type BB		Mucin-5B		Mucin-6		Lysozyme C		Ovoinhibitor
	Uniprot ID: P01012		Uniprot ID: P01013		Uniprot ID: P01014		Uniprot ID: I0J178		Uniprot ID: I0J179		Uniprot ID: P02789		Uniprot ID: F1NVN3		Uniprot ID: Q4ADJ7		Uniprot ID: Q4ADG4		Uniprot ID: Q4ADJ6		Uniprot ID: E1BQC2		Uniprot ID: Q92062		Uniprot ID: E1BVL8		Uniprot ID: P01005		Uniprot ID: B6V1G0		Uniprot ID: I0J170		Uniprot ID: I0J171		Uniprot ID: I0J172		Uniprot ID: I0J173		Uniprot ID: I0J174		Uniprot ID: I0J175		Uniprot ID: Q98UI9		Uniprot ID: F1NBL0		Uniprot ID: P00698		Uniprot ID: P10184
	Di-peptide	Tri-peptide	Di-peptide	Tri-peptide	Di-peptide	Tri-peptide	Di-peptide	Tri-peptide	Di-peptide	Tri-peptide	Di-peptide	Tri-peptide	Di-peptide	Tri-peptide	Di-peptide	Tri-peptide	Di-peptide	Tri-peptide	Di-peptide	Tri-peptide	Di-peptide	Tri-peptide	Di-peptide	Tri-peptide	Di-peptide	Tri-peptide	Di-peptide	Tri-peptide	Di-peptide	Tri-peptide	Di-peptide	Tri-peptide	Di-peptide	Tri-peptide	Di-peptide	Tri-peptide	Di-peptide	Tri-peptide	Di-peptide	Tri-peptide	Di-peptide	Tri-peptide	Di-peptide	Tri-peptide	Di-peptide	Tri-peptide	Di-peptide	Tri-peptide	Di-peptide
1	MG	MGS	QI	QIK	MD	MDS	MD	MDS	MD	MDS	MK	MKL	MK	MKS	MK	MKL	MK	MKL	MK	MKL	MK	MKL	MK	MKS	MK	MKA	MA	MAM	MA	MAM	MG	MGA	MG	MGA	MG	MGA	MG	MGA	MG	MGA	MG	MGA	ME	MEI	CS	CST	MR	MRS	MR
2	GS	GSI	IK	IKD	DS	DSI	DS	DSI	DS	DSI	KL	KLI	KS	KSS	KL	KLI	KL	KLI	KL	KLI	KL	KLI	KS	KSS	KA	KAV	AM	AMA	AM	AMA	GA	GAL	GA	GAL	GA	GAL	GA	GAL	GA	GAL	GA	GAL	EI	EIK	ST	STW	RS	RSL	RT
3	SI	SIG	KD	KDL	SI	SIS	SI	SIS	SI	SIS	LI	LIL	SS	SSE	LI	LIL	LI	LIL	LI	LIL	LI	LIL	SS	SSE	AV	AVL	MA	MAG	MA	MAG	AL	ALL	AL	ALL	AL	ALL	AL	ALL	AL	ALL	AL	ALL	IK	IKK	TW	TWG	SL	SLL	TA
4	IG	IGA	DL	DLL	IS	ISV	IS	ISV	IS	ISL	IL	ILC	SE	SEN	IL	ILC	IL	ILC	IL	ILC	IL	ILC	SE	SEN	VL	VLI	AG	AGV	AG	AGV	LL	LLA	LL	LLA	LL	LLA	LL	LLA	LL	LLA	LL	LLA	KK	KKE	WG	WGG	LL	LLI	AR
5	GA	GAA	LL	LLV	SV	SVT	SV	SVT	SL	SLT	LC	LCT	EN	ENV	LC	LCT	LC	LCT	LC	LCT	LC	LCT	EN	ENV	LI	LII	GV	GVF	GV	GVF	LA	LAL	LA	LAL	LA	LAL	LA	LAL	LA	LAL	LA	LAL	KE	KER	GG	GGG	LI	LIL	RQ
6	AA	AAS	LV	LVS	VT	VTN	VT	VTN	LT	LTN	CT	CTV	NV	NVL	CT	CTV	CT	CTV	CT	CTV	CT	CTV	NV	NVL	II	IIV	VF	VFV	VF	VFV	AL	ALL	AL	ALL	AL	ALL	AL	ALL	AL	ALL	AL	ALL	ER	ERS	GG	GGH	IL	ILV	QF
7	AS	ASM	VS	VSS	TN	TNA	TN	TNA	TN	TNA	TV	TVL	VL	VLY	TV	TVL	TV	TVL	TV	TVL	TV	TVL	VL	VLY	IV	IVL	FV	FVL	FV	FVL	LL	LLD	LL	LLD	LL	LLD	LL	LLD	LL	LLD	LL	LLD	RS	RSF	GH	GHF	LV	LVL	FV
8	SM	SME	SS	SSS	NA	NAK	NA	NAK	NA	NAK	VL	VLS	LY	LYL	VL	VLS	VL	VLS	VL	VLS	VL	VLS	LY	LYL	VL	VLI	VL	VLF	VL	VLF	LD	LDP	LD	LDP	LD	LDP	LD	LDP	LD	LDP	LD	LDP	SF	SFW	HF	HFS	VL	VLC	VQ
9	ME	MEF	SS	SST	AK	AKF	AK	AKF	AK	AKF	LS	LSL	YL	YLL	LS	LSL	LS	LSL	LS	LSL	LS	LSL	YL	YLL	LI	LII	LF	LFS	LF	LFS	DP	DPV	DP	DPV	DP	DPV	DP	DPV	DP	DPV	DP	DPV	FW	FWI	FS	FST	LC	LCF	QV
10	EF	EFC	ST	STD	KF	KFC	KF	KFC	KF	KFC	SL	SLG	LL	LLL	SL	SLG	SL	SLG	SL	SLG	SL	SLG	LL	LLL	II	IIF	FS	FSF	FS	FSF	PV	PVQ	PV	PVQ	PV	PVQ	PV	PVQ	PV	PVQ	PV	PVQ	WI	WIF	ST	STF	CF	CFL	VA
11	FC	FCF	TD	TDL	FC	FCF	FC	FCF	FC	FCF	LG	LGI	LL	LLV	LG	LGI	LG	LGI	LG	LGI	LG	LGI	LL	LLV	IF	IFT	SF	SFV	SF	SFV	VQ	VQP	VQ	VQP	VQ	VQP	VQ	VQP	VQ	VQP	VQ	VQP	IF	IFC	TF	TFD	FL	FLP	AL
12	CF	CFD	DL	DLD	CF	CFD	CF	CFD	CF	CFD	GI	GIA	LV	LVH	GI	GIA	GI	GIA	GI	GIA	GI	GIA	LV	LVH	FT	FTS	FV	FVL	FV	FVL	QP	QPT	QP	QPT	QP	QPT	QP	QPT	QP	QPT	QP	QPT	FC	FCL	FD	FDK	LP	LPL	LA
13	FD	FDV	LD	LDT	FD	FDV	FD	FDV	FD	FDV	IA	IAA	VH	VHA	IA	IAA	IA	IAA	IA	IAA	IA	IAA	VH	VHA	TS	TSL	VL	VLC	VL	VLC	PT	PTR	PT	PTR	PT	PTR	PT	PTR	PT	PTR	PT	PTR	CL	CLI	DK	DKY	PL	PLA	AL
14	DV	DVF	DT	DTT	DV	DVF	DV	DVF	DV	DVF	AA	AAV	HA	HAA	AA	AAV	AA	AAV	AA	AAV	AA	AAV	HA	HAA	SL	SLS	LC	LCG	LC	LCG	TR	TRA	TR	TRA	TR	TRA	TR	TRA	TR	TRA	TR	TRA	LI	LIW	KY	KYQ	LA	LAA	LC
15	VF	VFK	TT	TTL	VF	VFN	VF	VFN	VF	VFN	AV	AVC	AA	AAL	AV	AVC	AV	AVC	AV	AVC	AV	AVC	AA	AAL	LS	LSS	CG	CGF	CG	CGF	RA	RAP	RA	RAP	RA	RAP	RA	RAP	RA	RAP	RA	RAP	IW	IWS	YQ	YQY	AA	AAL	CC
16	FK	FKE	TL	TLV	FN	FNE	FN	FNE	FN	FNE	VC	VCF	AL	ALS	VC	VCF	VC	VCF	VC	VCF	VC	VCF	AL	ALS	SS	SSG	GF	GFL	GF	GFL	AP	APD	AP	APD	AP	APD	AP	APD	AP	APD	AP	APD	WS	WSF	QY	QYD	AL	ALG	CF
17	KE	KEL	LV	LVL	NE	NEM	NE	NEM	NE	NEM	CF	CFA	LS	LSL	CF	CFA	CF	CFA	CF	CFA	CF	CFA	LS	LSL	SG	SGK	FL	FLP	FL	FLP	PD	PDC	PD	PDC	PD	PDC	PD	PDC	PD	PDC	PD	PDC	SF	SFC	YD	YDF	LG	LGK	FA
18	EL	ELK	VL	VLV	EM	EMK	EM	EMK	EM	EMK	FA	FAA	SL	SLE	FA	FAA	FA	FAA	FA	FAA	FA	FAA	SL	SLE	GK	GKK	LP	LPD	LP	LPD	DC	DCG	DC	DCG	DC	DCG	DC	DCG	DC	DCG	DC	DCG	FC	FCK	DF	DFT	GK	GKV	AD
19	LK	LKV	LV	LVN	MK	MKV	MK	MKV	MK	MKV	AA	AAP	LE	LER	AA	AAP	AA	AAP	AA	AAP	AA	AAP	LE	LER	KK	KKF	PD	PDA	PD	PDA	CG	CGG	CG	CGG	CG	CGG	CG	CGG	CG	CGG	CG	CGG	CK	CKG	FT	FTG	KV	KVF	DI
20	KV	KVH	VN	VNA	KV	KVH	KV	KVH	KV	KVH	AP	APP	ER	ERV	AP	APP	AP	APP	AP	APP	AP	APP	ER	ERV	KF	KFR	DA	DAA	DA	DAV	GG	GGI	GG	GGI	GG	GGI	GG	GGI	GG	GGI	GG	GGI	KG	KGK	TG	TGT	VF	VFG	IA
21	VH	VHH	NA	NAI	VH	VHH	VH	VHH	VH	VHH	PP	PPK	RV	RVR	PP	PPK	PP	PPK	PP	PPK	PP	PPK	RV	RVR	FR	FRW	AA	AAF	AV	AVF	GI	GIL	GI	GIL	GI	GIL	GI	GIL	GI	GIL	GI	GIL	GK	GKE	GT	GTC	FG	FGR	AF
22	HH	HHA	AI	AIY	HH	HHV	HH	HHV	HH	HHV	PK	PKS	VR	VRW	PK	PKS	PK	PKS	PK	PKS	PK	PKS	VR	VRW	RW	RWC	AF	AFG	VF	VFG	IL	ILT	IL	ILT	IL	ILT	IL	ILT	IL	ILT	IL	ILT	KE	KEP	TC	TCN	GR	GRC	FG
23	HA	HAN	IY	IYF	HV	HVN	HV	HVN	HV	HVN	KS	KSV	RW	RWC	KS	KSV	KS	KSV	KS	KSV	KS	KSV	RW	RWC	WC	WCT	FG	FGA	FG	FGA	LT	LTP	LT	LTP	LT	LTP	LT	LTP	LT	LTP	LT	LTP	EP	EPV	CN	CNY	RC	RCE	GI
24	AN	ANE	YF	YFK	VN	VNE	VN	VNE	VN	VNE	SV	SVI	WC	WCT	SV	SVI	SV	SVI	SV	SVI	SV	SVI	WC	WCT	CT	CTL	GA	GAE	GA	GAE	TP	TPL	TP	TPL	TP	TPL	TP	TPL	TP	TPL	TP	TPL	PV	PVQ	NY	NYI	CE	CEL	IE
25	NE	NEN	FK	FKG	NE	NEN	NE	NEN	NE	NEN	VI	VIR	CT	CTM	VI	VIR	VI	VIR	VI	VIR	VI	VIR	CT	CTM	TL	TLS	AE	AEV	AE	AEV	PL	PLG	PL	PLG	PL	PLG	PL	PLG	PL	PLG	PL	PLG	VQ	VQI	YI	YIF	EL	ELA	EV
26	EN	ENI	KG	KGM	EN	ENI	EN	ENI	EN	ENI	IR	IRW	TM	TMS	IR	IRW	IR	IRW	IR	IRW	IR	IRW	TM	TMS	LS	LSD	EV	EVD	EV	EVD	LG	LGL	LG	LGL	LG	LGL	LG	LGL	LG	LGL	LG	LGL	QI	QIV	IF	IFA	LA	LAA	VN
27	NI	NIF	GM	GMW	NI	NIL	NI	NIL	NI	NIL	RW	RWC	MS	MSN	RW	RWC	RW	RWC	RW	RWC	RW	RWC	MS	MSN	SD	SDL	VD	VDC	VD	VDC	GL	GLS	GL	GLS	GL	GLS	GL	GLS	GL	GLS	GL	GLS	IV	IVQ	FA	FAT	AA	AAA	NC
28	IF	IFY	MW	MWK	IL	ILY	IL	ILY	IL	ILY	WC	WCT	SN	SNQ	WC	WCT	WC	WCT	WC	WCT	WC	WCT	SN	SNQ	DL	DLE	DC	DCS	DC	DCS	LS	LSY	LS	LSY	LS	LSY	LS	LSY	LS	LSY	LS	LSY	VQ	VQV	AT	ATV	AA	AAM	CS
29	FY	FYC	WK	WKT	LY	LYC	LY	LYC	LY	LYC	CT	CTI	NQ	NQE	CT	CTI	CT	CTI	CT	CTI	CT	CTI	NQ	NQE	LE	LEQ	CS	CSR	CS	CSR	SY	SYL	SY	SYL	SY	SYL	SY	SYL	SY	SYL	SY	SYL	QV	QVS	TV	TVC	AM	AMK	SL
30	YC	YCP	KT	KTA	YC	YCP	YC	YCP	YC	YCP	TI	TIS	QE	QEL	TI	TIS	TI	TIS	TI	TIS	TI	TIS	QE	QEL	EQ	EQR	SR	SRF	SR	SRF	YL	YLA	YL	YLA	YL	YLA	YL	YLA	YL	YLA	YL	YLA	VS	VST	VC	VCD	MK	MKR	LY
31	CP	CPI	TA	TAF	CP	CPL	CP	CPL	CP	CPL	IS	ISS	EL	ELS	IS	ISS	IS	ISS	IS	ISS	IS	ISS	EL	ELS	QR	QRK	RF	RFP	RF	RFP	LA	LAE	LA	LAE	LA	LAE	LA	LAE	LA	LAE	LA	LAE	ST	STV	CD	CDE	KR	KRH	YA
32	PI	PIA	AF	AFN	PL	PLS	PL	PLS	PL	PLS	SS	SSP	LS	LSK	SS	SSP	SS	SSP	SS	SSP	SS	SSP	LS	LSK	RK	RKC	FP	FPN	FP	FPN	AE	AEV	AE	AEV	AE	AEV	AE	AEV	AE	AEV	AE	AEV	TV	TVG	DE	DES	RH	RHG	AS
33	IA	IAI	FN	FNA	LS	LSI	LS	LSI	LS	LSI	SP	SPE	SK	SKC	SP	SPE	SP	SPE	SP	SPE	SP	SPE	SK	SKC	KC	KCA	PN	PNA	PN	PNA	EV	EVS	EV	EVS	EV	EVS	EV	EVS	EV	EVS	EV	EVS	VG	VGR	ES	ESS	HG	HGL	SG
34	AI	AIM	NA	NAE	SI	SIL	SI	SIL	SI	SIL	PE	PEE	KC	KCK	PE	PEE	PE	PEE	PE	PEE	PE	PEE	KC	KCK	CA	CAE	NA	NAT	NA	NAT	VS	VSK	VS	VSK	VS	VSK	VS	VSK	VS	VSK	VS	VSK	GR	GRS	SS	SSP	GL	GLD	GI
35	IM	IMS	AE	AED	IL	ILT	IL	ILT	IL	ILT	EE	EEK	CK	CKD	EE	EEK	EE	EEK	EE	EEK	EE	EEK	CK	CKD	AE	AEL	AT	ATD	AT	ATD	SK	SKP	SK	SKP	SK	SKP	SK	SKP	SK	SKP	SK	SKP	RS	RSE	SP	SPD	LD	LDN	IG
36	MS	MSA	ED	EDT	LT	LTA	LT	LTA	LT	LTA	EK	EKK	KD	KDM	EK	EKK	EK	EKK	EK	EKK	EK	EKK	KD	KDM	EL	ELS	TD	TDK	TD	TDM	KP	KPH	KP	KPH	KP	KPH	KP	KPH	KP	KPH	KP	KPH	SE	SEC	PD	PDF	DN	DNY	GK
37	SA	SAL	DT	DTR	TA	TAL	TA	TAL	TA	TAL	KK	KKC	DM	DMS	KK	KKC	KK	KKC	KK	KKC	KK	KKC	DM	DMS	LS	LSK	DK	DKE	DM	DME	PH	PHA	PH	PHA	PH	PHA	PH	PHA	PH	PHA	PH	PHA	EC	ECT	DF	DFN	NY	NYR	KD
38	AL	ALA	TR	TRE	AL	ALA	AL	ALA	AL	ALA	KC	KCN	MS	MSN	KC	KCN	KC	KCN	KC	KCN	KC	KCN	MS	MSN	SK	SKA	KE	KEG	ME	MEG	HA	HAE	HA	HAE	HA	HAE	HA	HAE	HA	HAE	HA	HAE	CT	CTT	FN	FNI	YR	YRG	DG
39	LA	LAM	RE	REM	LA	LAM	LA	LAM	LA	LAM	CN	CNN	SN	SNA	CN	CNN	CN	CNN	CN	CNN	CN	CNN	SN	SNA	KA	KAL	EG	EGK	EG	EGK	AE	AEV	AE	AEV	AE	AEV	AE	AEV	AE	AEV	AE	AEV	TT	TTW	NI	NIQ	RG	RGY	GT
40	AM	AMV	EM	EMP	AM	AMV	AM	AMV	AM	AMV	NN	NNL	NA	NAF	NN	NNL	NN	NNL	NN	NNL	NN	NNL	NA	NAF	AL	ALT	GK	GKD	GK	GKD	EV	EVV	EV	EVV	EV	EVV	EV	EVV	EV	EVV	EV	EVV	TW	TWG	IQ	IQF	GY	GYS	TS
41	MV	MVY	MP	MPF	MV	MVY	MV	MVY	MV	MVY	NL	NLR	AF	AFT	NL	NLR	NL	NLR	NL	NLR	NL	NLR	AF	AFT	LT	LTA	KD	KDV	KD	KDV	VV	VVL	VV	VVL	VV	VVL	VV	VVL	VV	VVL	VV	VVL	WG	WGN	QF	QFR	YS	YSL	SW
42	VY	VYL	PF	PFH	VY	VYL	VY	VYL	VY	VYL	LR	LRD	FT	FTG	LR	LRD	LR	LRD	LR	LRD	LR	LRD	FT	FTG	TA	TAV	DV	DVL	DV	DVL	VL	VLR	VL	VLR	VL	VLR	VL	VLR	VL	VLR	VL	VLR	GN	GNF	FR	FRR	SL	SLG	WV
43	YL	YLG	FH	FHV	YL	YLG	YL	YLG	YL	YLG	RD	RDL	TG	TGA	RD	RDL	RD	RDL	RD	RDL	RD	RDL	TG	TGA	AV	AVL	VL	VLV	VL	VLV	LR	LRQ	LR	LRQ	LR	LRQ	LR	LRQ	LR	LRQ	LR	LRQ	NF	NFH	RR	RRG	LG	LGN	VA
44	LG	LGA	HV	HVT	LG	LGA	LG	LGA	LG	LGA	DL	DLT	GA	GAG	DL	DLT	DL	DLT	DL	DLT	DL	DLT	GA	GAG	VL	VLP	LV	LVC	LV	LVC	RQ	RQD	RQ	RQD	RQ	RQD	RQ	RQD	RQ	RQD	RQ	RQD	FH	FHF	RG	RGL	GN	GNW	AC
45	GA	GAK	VT	VTK	GA	GAR	GA	GAR	GA	GAR	LT	LTQ	AG	AGI	LT	LTQ	LT	LTQ	LT	LTQ	LT	LTQ	AG	AGI	LP	LPV	VC	VCN	VC	VCN	QD	QDL	QD	QDL	QD	QDL	QD	QDL	QD	QDL	QD	QDL	HF	HFH	GL	GLD	NW	NWV	CP
46	AK	AKD	TK	TKQ	AR	ARG	AR	ARG	AR	ARG	TQ	TQQ	GI	GIL	TQ	TQQ	TQ	TQQ	TQ	TQQ	TQ	TQQ	GI	GIL	PV	PVT	CN	CNK	CN	CNK	DL	DLM	DL	DLM	DL	DLM	DL	DLM	DL	DLM	DL	DLM	FH	FHT	LD	LDK	WV	WVC	PR
47	KD	KDS	KQ	KQE	RG	RGN	RG	RGN	RG	RGN	QQ	QQE	IL	ILP	QQ	QQE	QQ	QQE	QQ	QQE	QQ	QQE	IL	ILP	VT	VTS	NK	NKD	NK	NKD	LM	LMA	LM	LMA	LM	LMA	LM	LMA	LM	LMA	LM	LMA	HT	HTF	DK	DKK	VC	VCA	RN
48	DS	DST	QE	QES	GN	GNT	GN	GNT	GN	GNT	QE	QER	LP	LPP	QE	QER	QE	QER	QE	QER	QE	QER	LP	LPP	TS	TSI	KD	KDL	KD	KDL	MA	MAQ	MA	MAQ	MA	MAQ	MA	MAQ	MA	MAQ	MA	MAQ	TF	TFD	KK	KKI	CA	CAA	NL
49	ST	STR	ES	ESK	NT	NTE	NT	NTE	NT	NTE	ER	ERI	PP	PPL	ER	ERI	ER	ERI	ER	ERI	ER	ERI	PP	PPL	SI	SID	DL	DLR	DL	DLR	AQ	AQR	AQ	AQR	AQ	AQR	AQ	AQR	AQ	AQR	AQ	AQR	FD	FDH	KI	KIA	AA	AAK	LK
50	TR	TRT	SK	SKP	TE	TES	TE	TES	TE	TES	RI	RIS	PL	PLE	RI	RIS	RI	RIA	RI	RIA	RI	RIS	PL	PLE	ID	IDS	LR	LRP	LR	LRP	QR	QRA	QR	QRA	QR	QRA	QR	QRA	QR	QRA	QR	QRA	DH	DHV	IA	IAR	AK	AKF	KP
51	RT	RTQ	KP	KPV	ES	ESQ	ES	ESQ	ES	ESQ	IS	ISL	LE	LEC	IS	ISL	IA	IAL	IA	IAL	IS	ISL	LE	LEC	DS	DSF	RP	RPI	RP	RPI	RA	RAS	RA	RAS	RA	RAS	RA	RAS	RA	RAS	RA	RAS	HV	HVK	AR	ARI	KF	KFE	PV
52	TQ	TQI	PV	PVQ	SQ	SQM	SQ	SQM	SQ	SQM	SL	SLT	EC	ECM	SL	SLT	AL	ALT	AL	ALT	SL	SLT	EC	ECM	SF	SFA	PI	PIC	PI	PIC	AS	ASD	AS	ASD	AS	ASD	AS	ASD	AS	ASD	AS	ASD	VK	VKF	RI	RII	FE	FES	VC
53	QI	QIN	VQ	VQM	QM	QMK	QM	QMK	QM	QMK	LT	LTC	CM	CME	LT	LTC	LT	LTC	LT	LTC	LT	LTC	CM	CME	FA	FAR	IC	ICG	IC	ICG	SD	SDL	SD	SDL	SD	SDL	SD	SDL	SD	SDL	SD	SDL	KF	KFT	II	III	ES	ESN	CG
54	IN	INK	QM	QMM	MK	MKK	MK	MKK	MK	MKK	TC	TCV	ME	MEG	TC	TCV	TC	TCV	TC	TCV	TC	TCV	ME	MEG	AR	ARI	CG	CGT	CG	CGT	DL	DLF	DL	DLF	DL	DLF	DL	DLF	DL	DLF	DL	DLF	FT	FTF	II	IIE	SN	SNF	GT
55	NK	NKV	MM	MMC	KK	KKV	KK	KKV	KK	KKV	CV	CVQ	EG	EGE	CV	CVQ	CV	CVQ	CV	CVQ	CV	CVQ	EG	EGE	RI	RIS	GT	GTD	GT	GTD	LF	LFL	LF	LFL	LF	LFL	LF	LFL	LF	LFL	LF	LFL	TF	TFP	IE	IEL	NF	NFN	TD
56	KV	KVV	MC	MCM	KV	KVL	KV	KVL	KV	KVL	VQ	VQK	GE	GES	VQ	VQK	VQ	VQK	VQ	VQK	VQ	VQK	GE	GES	IS	ISC	TD	TDG	TD	TDG	FL	FLG	FL	FLG	FL	FLG	FL	FLG	FL	FLG	FL	FLG	FP	FPG	EL	ELG	FN	FNT	DG
57	VV	VVR	CM	CMN	VL	VLH	VL	VLH	VL	VLH	QK	QKA	ES	ESA	QK	QKA	QK	QKA	QK	QKA	QK	QKA	ES	ESA	SC	SCI	DG	DGV	DG	DGV	LG	LGS	LG	LGS	LG	LGS	LG	LGS	LG	LGS	LG	LGS	PG	PGT	LG	LGP	NT	NTQ	GS
58	VR	VRF	MN	MNN	LH	LHF	LH	LHF	LH	LHF	KA	KAT	SA	SAA	KA	KAT	KA	KAT	KA	KAT	KA	KAT	SA	SAA	CI	CIR	GV	GVT	GV	GVT	GS	GSM	GS	GSM	GS	GSM	GS	GSM	GS	GSM	GS	GSM	GT	GTC	GP	GPS	TQ	TQA	ST
59	RF	RFD	NN	NNS	HF	HFD	HF	HFD	HF	HFD	AT	ATY	AA	AAN	AT	ATY	AT	ATY	AT	ATY	AT	ATY	AA	AAN	IR	IRA	VT	VTY	VT	VTY	SM	SME	SM	SME	SM	SME	SM	SME	SM	SME	SM	SME	TC	TCT	PS	PSV	QA	QAT	TY
60	FD	FDK	NS	NSF	FD	FDS	FD	FDS	FD	FDS	TY	TYL	AN	ANC	TY	TYL	TY	TYL	TY	TYL	TY	TYL	AN	ANC	RA	RAH	TY	TYT	TY	TYT	ME	MEP	ME	MEP	ME	MEP	ME	MEP	ME	MEP	ME	MEP	CT	CTY	SV	SVI	AT	ATN	YS
61	DK	DKL	SF	SFN	DS	DSI	DS	DSI	DS	DSI	YL	YLD	NC	NCT	YL	YLD	YL	YLD	YL	YLD	YL	YLD	NC	NCT	AH	AHN	YT	YTN	YT	YTN	EP	EPS	EP	EPS	EP	EPS	EP	EPS	EP	EPS	EP	EPS	TY	TYV	VI	VII	TN	TNR	SN
62	KL	KLP	FN	FNV	SI	SIT	SI	SIT	SI	SIT	LD	LDC	CT	CTQ	LD	LDC	LD	LDC	LD	LDC	LD	LDC	CT	CTQ	HN	HNT	TN	TND	TN	TND	PS	PSR	PS	PSR	PS	PSR	PS	PSR	PS	PSR	PS	PSR	YV	YVF	II	IIV	NR	NRN	NE
63	LP	LPG	NV	NVA	IT	ITG	IT	ITG	IT	ITG	DC	DCI	TQ	TQM	DC	DCI	DC	DCI	DC	DCI	DC	DCI	TQ	TQM	NT	NTY	ND	NDC	ND	NDC	SR	SRN	SR	SRN	SR	SRN	SR	SRN	SR	SRN	SR	SRN	VF	VFA	IV	IVE	RN	RNT	EC
64	PG	PGF	VA	VAT	TG	TGA	TG	TGA	TG	TGA	CI	CIK	QM	QMI	CI	CIK	CI	CIK	CI	CIK	CI	CIK	QM	QMI	TY	TYD	DC	DCL	DC	DCL	RN	RNR	RN	RNR	RN	RNR	RN	RNR	RN	RNR	RN	RNR	FA	FAS	VE	VEK	NT	NTD	CG
65	GF	GFG	AT	ATL	GA	GAG	GA	GAG	GA	GAG	IK	IKA	MI	MIK	IK	IKA	IK	IKA	IK	IKA	IK	IKA	MI	MIK	YD	YDC	CL	CLL	CL	CLL	NR	NRI	NR	NRI	NR	NRI	NR	NRI	NR	NRI	NR	NRI	AS	ASH	EK	EKD	TD	TDG	GI
66	FG	FGD	TL	TLP	AG	AGS	AG	AGS	AG	AGS	KA	KAI	IK	IKD	KA	KAI	KA	KAI	KA	KAI	KA	KAI	IK	IKD	DC	DCI	LL	LLC	LL	LLC	RI	RIT	RI	RIT	RI	RIT	RI	RIT	RI	RIT	RI	RIT	SH	SHC	KD	KDS	DG	DGS	IC
67	GD	GDS	LP	LPA	GS	GST	GS	GST	GS	GST	AI	AIA	KD	KDY	AI	AIA	AI	AIA	AI	AIA	AI	AIA	KD	KDY	CI	CID	LC	LCA	LC	LCA	IT	ITS	IT	ITS	IT	ITS	IT	ITS	IT	ITS	IT	ITS	HC	HCN	DS	DSI	GS	GST	CL
68	DS	DSI	PA	PAE	ST	STT	ST	STT	ST	STT	IA	IAN	DY	DYL	IA	IAN	IA	IAN	IA	IAN	IA	IAN	DY	DYL	ID	IDK	CA	CAY	CA	CAY	TS	TSV	TS	TSV	TS	TSV	TS	TSV	TS	TSV	TS	TSV	CN	CND	SI	SIS	ST	STD	LY
69	SI	SIE	AE	AEK	TT	TTD	TT	TTD	TT	TTD	AN	ANN	YL	YLA	AN	ANN	AN	ANN	AN	ANN	AN	ANN	YL	YLA	DK	DKI	AY	AYS	AY	AYS	SV	SVK	SV	SVK	SV	SVK	SV	SVK	SV	SVK	SV	SVK	ND	NDS	IS	ISV	TD	TDY	YN
70	IE	IEA	EK	EKM	TD	TDS	TD	TDS	TD	TDS	NN	NNE	LA	LAD	NN	NNE	NN	NNE	NN	NNE	NN	NNE	LA	LAD	KI	KIR	YS	YSI	YS	YSV	VK	VKV	VK	VKV	VK	VKV	VK	VKV	VK	VKV	VK	VKV	DS	DSY	SV	SVR	DY	DYG	NR
71	EA	EAQ	KM	KMK	DS	DSQ	DS	DSQ	DS	DSQ	NE	NEA	AD	ADA	NE	NEA	NE	NEA	NE	NEA	NE	NEA	AD	ADT	IR	IRV	SI	SIE	SV	SVE	KV	KVA	KV	KVA	KV	KVA	KV	KVA	KV	KVA	KV	KVA	SY	SYQ	VR	VRS	YG	YGI	RE
72	AQ	AQC	MK	MKI	SQ	SQC	SQ	SQC	SQ	SQC	EA	EAD	DA	DAV	EA	EAD	EA	EAD	EA	EAD	EA	EAD	DT	DTV	RV	RVN	IE	IEF	VE	VEF	VA	VAD	VA	VAD	VA	VAD	VA	VAD	VA	VAD	VA	VAD	YQ	YQD	RS	RSV	GI	GIL	EH
73	QC	QCG	KI	KIL	QC	QCG	QC	QCG	QC	QCG	AD	ADA	AV	AVT	AD	ADA	AD	ADA	AD	ADA	AD	ADA	TV	TVT	VN	VNK	EF	EFG	EF	EFG	AD	ADL	AD	ADL	AD	ADL	AD	ADL	AD	ADL	AD	ADL	QD	QDF	SV	SVG	IL	ILQ	HG
74	CG	CGT	IL	ILE	CG	CGS	CG	CGS	CG	CGS	DA	DAI	VT	VTL	DA	DAI	DA	DAI	DA	DAI	DA	DAI	VT	VTL	NK	NKA	FG	FGT	FG	FGT	DL	DLW	DL	DLW	DL	DLW	DL	DLW	DL	DLW	DL	DLW	DF	DFN	VG	VGV	LQ	LQI	GA
75	GT	GTS	LE	LEL	GS	GSS	GS	GSS	GS	GSS	AI	AIS	TL	TLD	AI	AIS	AI	AIS	AI	AIS	AI	AIS	TL	TLD	KA	KAD	GT	GTN	GT	GTN	LW	LWL	LW	LWL	LW	LWL	LW	LWL	LW	LWL	LW	LWL	FN	FNI	GV	GVI	QI	QIN	AN
76	TS	TSV	EL	ELP	SS	SSE	SS	SSE	SS	SSE	IS	ISL	LD	LDG	IS	ISL	IS	ISL	IS	ISL	IS	ISL	LD	LDG	AD	ADA	TN	TNI	TN	TNI	WL	WLS	WL	WLS	WL	WLS	WL	WLS	WL	WLS	WL	WLS	NI	NIK	VI	VIK	IN	INS	NV
77	SV	SVN	LP	LPF	SE	SEY	SE	SEY	SE	SEY	SL	SLD	DG	DGR	SL	SLD	SL	SLD	SL	SLD	SL	SLD	DG	DGR	DA	DAA	NI	NIS	NI	NIS	LS	LSV	LS	LSV	LS	LSV	LS	LSV	LS	LSV	LS	LSV	IK	IKI	IK	IKL	NS	NSR	VE
78	VN	VNV	PF	PFA	EY	EYV	EY	EYV	EY	EYV	LD	LDG	GR	GRW	LD	LDG	LD	LDG	LD	LDG	LD	LDG	GR	GRW	AA	AAS	IS	ISK	IS	ISK	SV	SVI	SV	SVI	SV	SVI	SV	SVI	SV	PEA	SV	PEA	KI	KIR	KL	KLP	SR	SRW	EK
79	NV	NVH	FA	FAS	YV	YVH	YV	YVH	YV	YVH	DG	DGG	RW	RWI	DG	DGG	DG	DGG	DG	DGG	DG	DGG	RW	RWI	AS	ASL	SK	SKE	SK	SKE	VI	VIP	VI	VIP	VI	VIP	VI	VIP	PE	EAG	PE	EAG	IR	IRR	LP	LPY	RW	RWW	KE
80	VH	VHS	AS	ASG	VH	VHN	VH	VHN	VH	VHN	GG	GGQ	WI	WIY	GG	GGQ	GG	GGQ	GG	GGQ	GG	GGQ	WI	WIY	SL	SLD	KE	KEH	KE	KEH	IP	IPE	IP	IPE	IP	IPE	IP	IPE	EA	AGL	EA	AGL	RR	RRS	PY	PYA	WW	WWC	EY
81	HS	HSS	SG	SGD	HN	HNL	HN	HNL	HN	HNL	GQ	GQA	IY	IYQ	GQ	GQV	GQ	GQV	GQ	GQV	GQ	GQV	IY	IYQ	LD	LDA	EH	EHD	EH	EHD	PE	PEA	PE	PEA	PE	PEA	PE	PEA	AG	GLR	AG	GLR	RS	RSD	YA	YAS	WC	WCN	YD
82	SS	SSL	GD	GDL	NL	NLF	NL	NLF	NL	NLF	QA	QAF	YQ	YQA	QV	QVF	QV	QVF	QV	QVF	QV	QVF	YQ	YQA	DA	DAG	HD	HDG	HD	HDG	EA	EAG	EA	EAG	EA	EAG	EA	EAG	GL	LRL	GL	LRL	SD	SDK	AS	ASN	CN	CND	DG
83	SL	SLR	DL	DLS	LF	LFK	LF	LFK	LF	LFK	AF	AFE	QA	QAG	VF	VFE	VF	VFE	VF	VFE	VF	VFE	QA	QAG	AG	AGD	DG	DGE	DG	DGE	AG	AGL	AG	AGL	AG	AGL	AG	AGL	LR	RLG	LR	RLG	DK	DKN	SN	SNG	ND	NDG	GE
84	LR	LRD	LS	LSM	FK	FKE	FK	FKE	FK	FKE	FE	FEA	AG	AGK	FE	FEA	FE	FEA	FE	FEA	FE	FEA	AG	AGK	GD	GDV	GE	GEC	GE	GEC	GL	GLR	GL	GLR	GL	GLR	GL	GLR	RL	EVE	RL	EVE	KN	KNS	NG	NGI	DG	DGR	EC
85	RD	RDI	SM	SML	KE	KEL	KE	KEL	KE	KEL	EA	EAG	GK	GKE	EA	EAG	EA	EAG	EA	EAG	EA	EAG	GK	GKE	DV	DVY	EC	ECK	EC	ECK	LR	LRL	LR	LRL	LR	LRL	LR	LRL	LG	VEL	LG	VEL	NS	NSH	GI	GIQ	GR	GRT	CR
86	DI	DIL	ML	MLV	EL	ELL	EL	ELL	EL	ELL	AG	AGL	KE	KEY	AG	AGL	AG	AGL	AG	AGL	AG	AGL	KE	KEY	VY	VYS	CK	CKE	CK	CKE	RL	RLG	RL	RLG	RL	RLG	RL	RLG	EV	ELR	EV	ELR	SH	SHL	IQ	IQI	RT	RTP	RP
87	IL	ILN	LV	LVL	LL	LLS	LL	LLS	LL	LLS	GL	GLA	EY	EYG	GL	GLA	GL	GLA	GL	GLA	GL	GLA	EY	EYG	YS	YSA	KE	KET	KE	KET	LG	LGI	LG	LGI	LG	LGI	LG	LGI	VE	APL	VE	APL	HL	HLI	QI	QIA	TP	TPG	PK
88	LN	LNQ	VL	VLL	LS	LSE	LS	LSE	LS	LSE	LA	LAP	YG	YGL	LA	LAP	LA	LAP	LA	LAP	LA	LAP	YG	YGL	SA	SAV	ET	ETV	ET	ETV	GI	GIE	GI	GIE	GI	GIE	GI	GIE	EL	PLH	EL	PLH	LI	LIY	IA	IAP	PG	PGS	KH
89	NQ	NQI	LL	LLP	SE	SEI	SE	SEI	SE	SEI	AP	APY	GL	GLK	AP	APY	AP	APY	AP	APY	AP	APY	GL	GLK	AV	AVK	TV	TVP	TV	TVP	IE	IEV	IE	IEV	IE	IEV	IE	IEV	LR	LHA	LR	LHA	IY	IYF	AP	APY	GS	GSR	HV
90	QI	QIT	LP	LPD	EI	EIT	EI	EIT	EI	EIT	PY	PYK	LK	LKP	PY	PYK	PY	PYK	PY	PYK	PY	PYK	LK	LKP	VK	VKL	VP	VPM	VP	VPM	EV	EVE	EV	EVE	EV	EVE	EV	EVE	AP	HAV	AP	HAV	YF	YFT	PY	PYG	SR	SRN	VM
91	IT	ITK	PD	PDE	IT	ITR	IT	ITR	IT	ITR	YK	YKL	KP	KPV	YK	YKL	YK	YKL	YK	YKL	YK	YKL	KP	KPV	KL	KLY	PM	PMN	PM	PMN	VE	VEL	VE	VEL	VE	VEL	VE	VEL	PL	AVP	PL	AVP	FT	FTV	YG	YGR	RN	RNL	MI
92	TK	TKP	DE	DEV	TR	TRP	TR	TRP	TR	TRP	KL	KLK	PV	PVV	KL	KLK	KL	KLK	KL	KLK	KL	KLK	PV	PVV	LY	LYG	MN	MNC	MN	MNC	EL	ELR	EL	ELR	EL	ELR	EL	ELR	LH	VPM	LH	VPM	TV	TVT	GR	GRS	NL	NLC	ID
93	KP	KPN	EV	EVS	RP	RPN	RP	RPN	RP	RPN	LK	LKP	VV	VVG	LK	LKP	LK	LKP	LK	LKP	LK	LKP	VV	VVG	YG	YGL	NC	NCS	NC	NCS	LR	LRV	LR	LRV	LR	LRI	LR	LRI	HA	PMP	HA	PMP	VT	VTT	RS	RSV	LC	LCN	DC
94	PN	PND	VS	VSD	PN	PNA	PN	PNA	PN	PNA	KP	KPI	VG	VGE	KP	KPI	KP	AAE	KP	KPV	KP	KPI	VG	VGE	GL	GLT	CS	CSS	CS	CSS	RV	RVA	RV	RVA	RI	RIA	RI	RIA	AV	MPV	AV	MPV	TT	TTD	SV	SVR	CN	CNI	CS
95	ND	NDV	SD	SDL	NA	NAT	NA	NAT	NA	NAT	PI	PIA	GE	GEV	PI	PIA	AA	AEV	PV	PVA	PI	PIA	GE	GEV	LT	LTV	SS	SSY	SS	SSY	VA	VAP	VA	VAP	IA	IAP	IA	IAP	VP	PVR	VP	PVR	TD	TDG	VR	VRL	NI	NIP	SP
96	DV	DVY	DL	DLE	AT	ATY	AT	ATY	AT	ATY	IA	IAA	EV	EVY	IA	IAA	AE	EVY	VA	VAA	IA	IAA	EV	EVY	TV	TVV	SY	SYA	SY	SYA	AP	APL	AP	APL	AP	APL	AP	APL	PM	VRI	PM	VRI	DG	DGV	RL	RLV	IP	IPC	PY
97	VY	VYS	LE	LER	TY	TYS	TY	TYS	TY	TYS	AA	AAE	VY	VYD	AA	AAE	EV	VYE	AA	AAE	AA	AAE	VY	VYD	VV	VVA	YA	YAN	YA	YAN	PL	PLH	PL	PLH	PL	PLH	PL	PLH	MP	RIS	MP	RIS	GV	GVI	LV	LVA	PC	PCS	YL
98	YS	YSF	ER	ERI	YS	YSL	YS	YSL	YS	YSL	AE	AEV	YD	YDQ	AE	AEV	VY	YEH	AE	AEV	AE	AEV	YD	YDQ	VA	VAK	AN	ANT	AN	ANT	LH	LHA	LH	LHA	LH	LHA	LH	LHA	PV	ISI	PV	ISI	VI	VIL	VA	VAK	CS	CSA	LQ
99	SF	SFS	RI	RIE	SL	SLE	SL	SLE	SL	SLE	EV	EVY	DQ	DQE	EV	EVY	YE	EHT	EV	EVY	EV	EVY	DQ	DQE	AK	AKE	NT	NTT	NT	NTT	HA	HAV	HA	HAV	HA	HAV	HA	HAV	VR	ADL	VR	ADL	IL	ILE	AK	AKL	SA	SAL	QV
100	FS	FSL	IE	IEK	LE	LEI	LE	LEI	LE	LEI	VY	VYE	QE	QEI	VY	VYE	EH	HTE	VY	VYE	VY	VYE	QE	QEI	KE	KEI	TT	TTS	TT	TTS	AV	AVP	AV	AVP	AV	AVP	AV	AVP	RI	DLH	RI	DLH	LE	LEV	KL	KLM	AL	ALL	VV
101	SL	SLA	EK	EKT	EI	EIA	EI	EIA	EI	EIA	YE	YEH	EI	EIG	YE	YEH	HT	TEG	YE	YEH	YE	YEH	EI	EIG	EI	EIY	TS	TSE	TS	TSE	VP	VPM	VP	VPM	VP	VPM	VP	VPM	IS	LHV	IS	LHV	EV	EVK	LM	LME	LL	LLS	VR
102	LA	LAS	KT	KTI	IA	IAD	IA	IAD	IA	IAD	EH	EHT	IG	IGT	EH	EHT	TE	EGS	EH	EHT	EH	EHT	IG	IGT	IY	IYE	SE	SED	SE	SED	PM	PMP	PM	PMP	PM	PMP	PM	PMP	SI	HVD	SI	HVD	VK	VKE	ME	MEM	LS	LSS	RD
103	AS	ASR	TI	TIN	AD	ADK	AD	ADK	AD	ADK	HT	HTE	GT	GTS	HT	HTE	EG	GST	HT	HTE	HT	HTE	GT	GTS	YE	YEQ	ED	EDG	ED	EDG	MP	MPV	MP	MPV	MP	MPV	MP	MPV	AD	VDM	AD	VDM	KE	KET	EM	EME	SS	SSD	DG
104	SR	SRL	IN	INF	DK	DKL	DK	DKL	DK	DKL	TE	TEG	TS	TSY	TE	TEG	GS	STT	TE	TEG	TE	TEG	TS	TSY	EQ	EQG	DG	DGK	DG	DGK	PV	PVR	PV	PVR	PV	PVR	PV	PVR	DL	DMG	DL	DMG	ET	ETG	ME	MEL	SD	SDI	GN
105	RL	RLY	NF	NFE	KL	KLY	KL	KLY	KL	KLY	EG	EGS	SY	SYY	EG	EGS	ST	TTS	EG	EGS	EG	EGS	SY	SYY	QG	QGN	GK	GKV	GK	GKV	VR	VRI	VR	VRI	VR	VRI	VR	VRI	LH	MGP	LH	MGP	TG	TGI	EL	ELV	DI	DIT	NT
106	LY	LYA	FE	FEK	LY	LYV	LY	LYV	LY	LYV	GS	GST	YY	YYA	GS	GST	TT	TSY	GS	GST	GS	GST	YY	YYA	GN	GNC	KV	KVM	KV	KVM	RI	RIS	RI	RIS	RI	RIS	RI	RIS	HV	GPD	HV	GPD	GI	GIT	LV	LVV	IT	ITA	TM
107	YA	YAE	EK	EKL	YV	YVD	YV	YVD	YV	YVD	ST	STT	YA	YAV	ST	STT	TS	SYY	ST	STT	ST	STT	YA	YAV	NC	NCV	VM	VMV	VM	VMV	IS	ISI	IS	ISI	IS	ISI	IS	ISI	VD	PDG	VD	PDG	IT	ITV	VV	VVM	TA	TAS	MV
108	AE	AEE	KL	KLT	VD	VDK	VD	VDK	VD	VDK	TT	TTS	AV	AVA	TT	TTS	SY	YYA	TT	TTS	TT	TTS	AV	AVA	CV	CVF	MV	MVL	MV	MVL	SI	SIR	SI	SIR	SI	SIQ	SI	SIR	DM	DGN	DM	DGN	TV	TVN	VM	VMW	AS	ASV	VA
109	EE	EER	LT	LTE	DK	DKT	DK	DKT	DK	DKT	TS	TSY	VA	VAV	TS	TSY	YY	YAV	TS	TSY	TS	TSY	VA	VAV	VF	VFA	VL	VLC	VL	VLC	IR	IRA	IR	IRA	IQ	IQA	IR	IRA	MG	GNL	MG	GNL	VN	VNG	MW	MWN	SV	SVN	AC
110	ER	ERY	TE	TEW	KT	KTF	KT	KTF	KT	KTF	SY	SYY	AV	AVV	SY	SYY	YA	AVA	SY	SYY	SY	SYY	AV	AVV	FA	FAV	LC	LCN	LC	LCN	RA	RAD	RA	RAD	QA	QAD	RA	RAD	GP	NLQ	GP	NLQ	NG	NGN	WN	WNN	VN	VNC	CP
111	RY	RYP	EW	EWT	TF	TFS	TF	TFS	TF	TFS	YY	YYA	VV	VVR	YY	YYA	AV	VAV	YY	YYA	YY	YYA	VV	VVR	AV	AVA	CN	CNR	CN	CNR	AD	ADL	AD	ADL	AD	ADL	AD	ADL	PD	LQL	PD	LQL	GN	GNQ	NN	NNE	NC	NCA	PR
112	YP	YPI	WT	WTN	FS	FSV	FS	FSV	FS	FSV	YA	YAV	VR	VRK	YA	YAV	VA	AVV	YA	YAV	YA	YAV	VR	VRK	VA	VAV	NR	NRA	NR	NRA	DL	DLH	DL	DLH	DL	DLH	DL	DLH	DG	QLL	DG	QLL	NQ	NQI	NE	NED	CA	CAK	RI
113	PI	PIL	TN	TNP	SV	SVL	SV	SVL	SV	SVL	AV	AVA	RK	RKG	AV	AVA	AV	VVK	AV	AVA	AV	AVA	RK	RKG	AV	AVA	RA	RAF	RA	RAF	LH	LHV	LH	LHV	LH	LHV	LH	LHV	GN	LLT	GN	LLT	QI	QIP	ED	EDY	AK	AKK	IL
114	IL	ILP	NP	NPN	VL	VLP	VL	VLP	VL	VLP	VA	VAV	KG	KGS	VA	VAV	VV	VKK	VA	VAV	VA	VAV	KG	KGS	VA	VAK	AF	AFN	AF	AFN	HV	HVD	HV	HVD	HV	HVD	HV	HVD	NL	LTS	NL	LTS	IP	IPL	DY	DYL	KK	KKI	LK
115	LP	LPE	PN	PNT	LP	LPE	LP	LPE	LP	LPE	AV	AVV	GS	GSN	AV	AVV	VK	KKG	AV	AVV	AV	AVV	GS	GSN	AK	AKR	FN	FNP	FN	FNP	VD	VDM	VD	VDM	VD	VDM	VD	VDM	LQ	TSA	LQ	TSA	PL	PLP	YL	YLM	KI	KIV	KP
116	PE	PEY	NT	NTM	PE	PEY	PE	PEY	PE	PEY	VV	VVK	SN	SNI	VV	VVK	KK	KGT	VV	VVK	VV	VVK	SN	SNI	KR	KRG	NP	NPV	NP	NPV	DM	DMG	DM	DMG	DM	DMG	DM	DMG	QL	SAC	QL	SAC	LP	LPF	LM	LMV	IV	IVS	PV
117	EY	EYL	TM	TME	EY	EYL	EY	EYL	EY	EYL	VK	VKK	NI	NIT	VK	VKK	KG	GTE	VK	VKK	VK	VKK	NI	NIT	RG	RGT	PV	PVC	PV	PVC	MG	MGP	MG	MGP	MG	MGP	MG	MGP	LL	ACR	LL	ACR	PF	PFS	MV	MVL	VS	VSD	VC
118	YL	YLQ	ME	MEK	YL	YLS	YL	YLS	YL	YLS	KK	KKG	IT	ITI	KK	KKG	GT	TEF	KK	KKG	KK	KKG	IT	ITI	GT	GTL	VC	VCG	VC	VCG	GP	GPD	GP	GPD	GP	GPD	GP	GPD	LT	CRP	LT	CRP	FS	FSL	VL	VLT	SD	SDG	CG
119	LQ	LQC	EK	EKR	LS	LSC	LS	LSC	LS	LSC	KG	KGT	TI	TIN	KG	KGT	TE	EFT	KG	KGT	KG	KGT	TI	TIN	TL	TLD	CG	CGT	CG	CGT	PD	PDG	PD	PDG	PD	PDG	PD	PDG	TS	RPT	TS	RPT	SL	SLK	LT	LTE	DG	DGN	GS
120	QC	QCV	KR	KRR	SC	SCA	SC	SCA	SC	SCA	GT	GTE	IN	INS	GT	GTE	EF	FTV	GT	GTE	GT	GTE	IN	INS	LD	LDI	GT	GTD	GT	GTD	DG	DGN	DG	DGN	DG	DGN	DG	DGN	SA	PTV	SA	PTV	LK	LKS	TE	TEK	GN	GNG	SD
121	CV	CVK	RR	RRV	CA	CAR	CA	CAR	CA	CAR	TE	TEF	NS	NSL	TE	TEF	FT	TVN	TE	TEF	TE	TEF	NS	NSL	DI	DIQ	TD	TDG	TD	TDG	GN	GNL	GN	GNL	GN	GNL	GN	GNL	AC	TVQ	AC	TVQ	KS	KSI	EK	EKK	NG	NGM	DS
122	VK	VKE	RV	RVK	AR	ARK	AR	ARK	AR	ARK	EF	EFT	SL	SLK	EF	EFT	TV	VND	EF	EFT	EF	EFT	SL	SLK	IQ	IQR	DG	DGV	DG	DGV	NL	NLQ	NL	NLQ	NL	NLQ	NL	NLQ	CR	VQA	CR	VQA	SI	SIL	KK	KKY	GM	GMN	SF
123	KE	KEL	VK	VKV	RK	RKF	RK	RKF	RK	RKF	FT	FTV	LK	LKG	FT	FTV	VN	NDL	FT	FTV	FT	FTV	LK	LKG	QR	QRL	GV	GVT	GV	GVT	LQ	LQL	LQ	LQL	LQ	LQL	LQ	LQL	RP	QAQ	RP	QAQ	IL	ILI	KY	KYM	MN	MNA	FT
124	EL	ELY	KV	KVY	KF	KFY	KF	KFY	KF	KFY	TV	TVN	KG	KGV	TV	TVN	ND	DLQ	TV	TVN	TV	TVN	KG	KGV	RL	RLR	VT	VTY	VT	VTY	QL	QLL	QL	QLL	QL	QLL	QL	QLL	PT	AQS	PT	AQS	LI	LIE	YM	YMG	NA	NAW	TY
125	LY	LYR	VY	VYL	FY	FYT	FY	FYT	FY	FYT	VN	VND	GV	GVR	VN	VND	DL	LQG	VN	VND	VN	VND	GV	GVR	LR	LRG	TY	TYD	TY	TYD	LL	LLT	LL	LLT	LL	LLT	LL	LLT	TV	QST	TV	QST	IE	IED	MG	MGK	AW	AWV	YD
126	YR	YRG	YL	YLP	YT	YTG	YT	YTG	YT	YTG	ND	NDL	VR	VRS	ND	NDL	LQ	QGK	ND	NDL	ND	NDL	VR	VRS	RG	RGV	YD	YDN	YD	YDN	LT	LTS	LT	LTS	LT	LTS	LT	LTS	VQ	STR	VQ	STR	ED	EDT	GK	GKT	WV	WVA	DN
127	RG	RGG	LP	LPQ	TG	TGG	TG	TGG	TG	TGG	DL	DLQ	RS	RSC	DL	DLQ	QG	GKT	DL	DLQ	DL	DLQ	RS	RSC	GV	GVR	DN	DNE	DN	DNE	TS	TSA	TS	TSA	TS	TSA	TS	TSA	QA	TRE	QA	TRE	DT	DTC	KT	KTC	VA	VAW	NE
128	GG	GGL	PQ	PQM	GG	GGV	GG	GGV	GG	GGV	LQ	LQG	SC	SCH	LQ	LQG	GK	KTS	LQ	LQG	LQ	LQG	SC	SCH	VR	VRS	NE	NEC	NE	NEC	SA	SAC	SA	SAC	SA	SAC	SA	SAC	AQ	REA	AQ	REA	TC	TCA	TC	TCG	AW	AWR	EC
129	GL	GLE	QM	QMK	GV	GVE	GV	GVE	GV	GVE	QG	QGK	CH	CHT	QG	QGK	KT	TSC	QG	QGK	QG	QGK	CH	CHT	RS	RSC	EC	ECL	EC	ECL	AC	ACR	AC	ACR	AC	ACR	AC	ACR	QS	EAE	QS	EAE	CA	CAY	CG	CGM	WR	WRN	CG
130	LE	LEP	MK	MKI	VE	VEE	VE	VEE	VE	VEE	GK	GKT	HT	HTG	GK	GKT	TS	SCH	GK	GKT	GK	GKT	HT	HTG	SC	SCH	CL	CLL	CL	CLL	CR	CRP	CR	CRP	CR	CRP	CR	CRP	ST	AES	ST	AES	AY	AYF	GM	GMC	RN	RNR	GI
131	EP	EPI	KI	KIE	EE	EEV	EE	EEV	EE	EEV	KT	KTS	TG	TGI	KT	KTS	SC	CHT	KT	KTS	KT	KTS	TG	TGI	CH	CHN	LL	LLC	LL	LLC	RP	RPT	RP	RPT	RP	RPT	RP	RPT	TR	ESK	TR	ESK	YF	YFQ	MC	MCG	NR	NRC	IC
132	PI	PIN	IE	IEE	EV	EVN	EV	EVN	EV	EVN	TS	TSC	GI	GIN	TS	TSC	CH	HTG	TS	TSC	TS	TSC	GI	GIN	HN	HNG	LC	LCA	LC	LCA	PT	PTV	PT	PTV	PT	PTV	PT	PTV	RE	SKS	RE	SKS	FQ	FQV	CG	CGN	RC	RCK	CA
133	IN	INF	EE	EEK	VN	VNF	VN	VNF	VN	VNF	SC	SCH	IN	INR	SC	SCH	HT	TGL	SC	SCH	SC	SCH	IN	INR	NG	NGA	CA	CAH	CA	CAH	TV	TVQ	TV	TVQ	TV	TVQ	TV	TVQ	EA	KSS	EA	KSS	QV	QVT	GN	GNY	CK	CKG	AY
134	NF	NFQ	EK	EKY	NF	NFK	NF	NFK	NF	NFK	CH	CHT	NR	NRT	CH	CHT	TG	GLG	CH	CHT	CH	CHT	NR	NRT	GA	GAR	AH	AHK	AH	AHK	VQ	VQA	VQ	VQA	VQ	VQA	VQ	VQA	AE	SSR	AE	SSR	VT	VTS	NY	NYD	KG	KGT	YN
135	FQ	FQT	KY	KYN	FK	FKT	FK	FKT	FK	FKT	HT	HTG	RT	RTA	HT	HTG	GL	LGR	HT	HTG	HT	HTG	RT	RTA	AR	ARW	HK	HKV	HK	HKV	QA	QAQ	QA	QAQ	QA	QAQ	QA	QAQ	ES	SRS	ES	SRS	TS	TSK	YD	YDG	GT	GTD	NA
136	QT	QTA	YN	YNL	KT	KTA	KT	KTA	KT	KTA	TG	TGL	TA	TAG	TG	TGL	LG	GRS	TG	TGL	TG	TGL	TA	TAG	RW	RWT	KV	KVE	KV	KVE	AQ	AQS	AQ	AQS	AQ	AQS	AQ	AQS	SK	RSI	SK	RSI	SK	SKL	DG	DGY	TD	TDV	AE
137	TA	TAA	NL	NLT	TA	TAA	TA	TAA	TA	TAA	GL	GLG	AG	AGW	GL	GLG	GR	RSA	GL	GLG	GL	GLG	AG	AGW	WT	WTS	VE	VEQ	VE	VEQ	QS	QST	QS	QST	QS	QST	QS	QST	KS	SIL	KS	SIL	KL	KLG	GY	GYE	DV	DVQ	EH
138	AA	AAD	LT	LTS	AA	AAE	AA	AAE	AA	AAE	LG	LGR	GW	GWN	LG	LGR	RS	SAG	LG	LGR	LG	LGR	GW	GWN	TS	TSG	EQ	EQG	EQ	EQG	ST	STR	ST	STR	ST	STR	ST	STR	SS	ILD	SS	ILD	LG	LGL	YE	YEL	VQ	VQA	HH
139	AD	ADQ	TS	TSV	AE	AEE	AE	AEE	AE	AEE	GR	GRS	WN	WNV	GR	GRS	SA	AGW	GR	GRS	GR	GRS	WN	WNV	SG	SGW	QG	QGA	QG	QGA	TR	TRE	TR	TRE	TR	TRE	TR	TRE	SR	LDK	SR	LDK	GL	GLT	EL	ELN	QA	QAW	HT
140	DQ	DQA	SV	SVL	EE	EEA	EE	EEA	EE	EEA	RS	RSA	NV	NVP	RS	RSA	AG	GWN	RS	RSA	RS	RSA	NV	NVP	GW	GWN	GA	GAS	GA	GAS	RE	REA	RE	REA	RE	REA	RE	REA	RS	DKV	RS	DKV	LT	LTL	LN	LND	AW	AWI	TN
141	QA	QAR	VL	VLM	EA	EAR	EA	EAR	EA	EAR	SA	SAG	VP	VPV	SA	SAG	GW	WNI	SA	SAG	SA	SAG	VP	VPV	WN	WNI	AS	ASV	AS	ASV	EA	EAE	EA	EAE	EA	EAE	EA	EAE	SI	KVV	SI	KVV	TL	TLK	ND	NDF	WI	WIR	NI
142	AR	ARE	LM	LMA	AR	ARQ	AR	ARQ	AR	ARQ	AG	AGW	PV	PVG	AG	AGW	WN	NIP	AG	AGW	AG	AGW	PV	PVG	NI	NIP	SV	SVD	SV	SVD	AE	AES	AE	AES	AE	AES	AE	AES	IL	VVD	IL	VVD	LK	LKW	DF	DFV	IR	IRG	IS
143	RE	REL	MA	MAL	RQ	RQL	RQ	RQL	RQ	RQL	GW	GWN	VG	VGY	GW	GWN	NI	IPI	GW	GWN	GW	GWN	VG	VGY	IP	IPL	VD	VDK	VD	VDK	ES	ESK	ES	ESK	ES	ESK	ES	ESK	LD	VDV	LD	VDV	KW	KWN	FV	FVS	RG	RGC	SK
144	EL	ELI	AL	ALG	QL	QLI	QL	QLI	QL	QLI	WN	WNI	GY	GYL	WN	WNI	IP	PIG	WN	WNI	WN	WNI	GY	GYL	PL	PLG	DK	DKR	DK	DKR	SK	SKS	SK	SKS	SK	SKS	SK	SKS	DK	DVD	DK	DVD	WN	WNW	VS	VSE	GC	GCR	KL
145	LI	LIN	LG	LGM	LI	LIN	LI	LIN	LI	LIN	NI	NIP	YL	YLI	NI	NIP	PI	IGT	NI	NIP	NI	NIP	YL	YLI	LG	LGF	KR	KRH	KR	KRH	KS	KSS	KS	KSS	KS	KSS	KS	KSS	KV	VDK	KV	VDK	NW	NWA	SE	SEG	CR	CRL	LH
146	IN	INS	GM	GMT	IN	INS	IN	INS	IN	INS	IP	IPI	LI	LID	IP	IPI	IG	GTL	IP	IPI	IP	IPI	LI	LID	GF	GFL	RH	RHD	RH	RHD	SS	SSR	SS	SSR	SS	SSR	SS	SSR	VV	DKL	VV	DKL	WA	WAD	EG	EGK	RL		HD
147	NS	NSW	MT	MTD	NS	NSW	NS	NSW	NS	NSW	PI	PIG	ID	IDS	PI	PIG	GT	TLI	PI	PIG	PI	PIG	ID	IDS	FL	FLL	HD	HDG	HD	HDG	SR	SRS	SR	SRS	SR	SRS	SR	SRS	VD	KLC	VD	KLC	AD	ADT	GK	GKL			DG
148	SW	SWV	TD	TDL	SW	SWV	SW	SWV	SW	SWV	IG	IGT	DS	DSG	IG	IGT	TL	LIH	IG	IGT	IG	IGT	DS	DSG	LL	LLA	DG	DGG	DG	DGG	RS	RSI	RS	RSI	RS	RSI	RS	RSI	DV	LCL	DV	LCL	DT	DTL	KL	KLL			GE
149	WV	WVE	DL	DLF	WV	WVE	WV	WVE	WV	WVE	GT	GTL	SG	SGR	GT	GTL	LI	IHR	GT	GTL	GT	GTL	SG	SGR	LA	LAR	GG	GGC	GG	GGC	SI	SIL	SI	SIL	SI	SIL	SI	SIL	VD	CLD	VD	CLD	TL	TLL	LL	LLD			EC
150	VE	VES	LF	LFI	VE	VEK	VE	VEK	VE	VEK	TL	TLL	GR	GRL	TL	TLI	IH	HRG	TL	TLI	TL	TLI	GR	GRL	AR	ARN	GC	GCR	GC	GCR	IL	ILD	IL	ILD	IL	ILD	IL	ILD	DK	LDV	DK	LDV	LL	LLL	LD	LDT			CK
151	ES	ESQ	FI	FIP	EK	EKE	EK	EKE	EK	EKE	LL	LLH	RL	RLP	LI	LIH	HR	RGA	LI	LIH	LI	LIH	RL	RLP	RN	RND	CR	CRK	CR	CRK	LD	LDK	LD	LDK	LD	LDK	LD	LDK	KL	DVS	KL	DVS	LL	LLD	DT	DTY			KL
152	SQ	SQT	IP	IPS	KE	KET	KE	KET	KE	KET	LH	LHR	LP	LPA	IH	IHR	RG	GAI	IH	IHR	IH	IHR	LP	LPA	ND	NDL	RK	RKE	RK	RKE	DK	DKV	DK	DKV	DK	DKV	DK	DKV	LC	VSK	LC	VSK	LD	LDL	TY	TYK			LE
153	QT	QTN	PS	PSA	ET	ETN	ET	ETN	ET	ETN	HR	HRG	PA	PAM	HR	HRG	GA	AIE	HR	HRG	HR	HRG	PA	PAM	DL	DLS	KE	KEL	KE	KEL	KV	KVV	KV	KVV	KV	KVV	KV	KVV	CL	SKL	CL	SKL	DL	DLE	YK	YKF			EI
154	TN	TNG	SA	SAN	TN	TNG	TN	TNG	TN	TNG	RG	RGA	AM	AMG	RG	RGA	AI	IEW	RG	RGA	RG	RGA	AM	AMG	LS	LSW	EL	ELA	EL	ELA	VV	VVD	VV	VVD	VV	VVD	VV	VVD	LD	KLL	LD	KLL	LE	LEE	KF	KFA			IG
155	NG	NGI	AN	ANL	NG	NGQ	NG	NGQ	NG	NGQ	GA	GAI	MG	MGC	GA	GAI	IE	EWE	GA	GAI	GA	GAI	MG	MGC	SW	SWD	LA	LAA	LA	LAA	VD	VDV	VD	VDV	VD	VDV	VD	VDV	DV	LLL	DV	LLL	EE	EET	FA	FAA			GS
156	GI	GII	NL	NLT	GQ	GQI	GQ	GQI	GQ	GQI	AI	AIE	GC	GCD	AI	AIE	EW	WEG	AI	AIE	AI	AIE	GC	GCD	WD	WDE	AA	AAV	AA	AAV	DV	DVD	DV	DVD	DV	DVD	DV	DVD	VS	LLF	VS	LLF	ET	ETY	AA	AAL			SV
157	II	IIR	LT	LTG	QI	QIK	QI	QIK	QI	QIK	IE	IEW	CD	CDL	IE	IEW	WE	EGI	IE	IEW	IE	IEW	CD	CDL	DE	DEA	AV	AVS	AV	AVS	VD	VDK	VD	VDK	VD	VDK	VD	VDK	SK	LFP	SK	LFP	TY	TYK	AL	ALQ			VD
158	IR	IRN	TG	TGI	IK	IKD	IK	IKD	IK	IKD	EW	EWE	DL	DLP	EW	EWE	EG	GIE	EW	EWE	EW	EWE	DL	DLP	EA	EAQ	VS	VSV	VS	VSV	DK	DKL	DK	DKL	DK	DKL	DK	DKL	KL	FPN	KL	FPN	YK	YKE	LQ	LQK			DC
159	RN	RNV	GI	GIS	KD	KDL	KD	KDL	KD	KDL	WE	WEG	LP	LPK	WE	WEG	GI	IES	WE	WEG	WE	WEG	LP	LPK	AQ	AQP	SV	SVD	SV	SVD	KL	KLC	KL	KLC	KL	KLC	KL	KLC	LL	PNE	LL	PNE	KE	KEK	QK	QKM			CS
160	NV	NVL	IS	ISS	DL	DLL	DL	DLL	DL	DLL	EG	EGI	PK	PKA	EG	EGI	IE	ESG	EG	EGI	EG	EGI	PK	PKA	QP	QPL	VD	VDC	VD	VDC	LC	LCL	LC	LCL	LC	LCL	LC	LCL	LL	NEQ	LL	NEQ	EK	EKI	KM	KMD			SK
161	VL	VLQ	SS	SSA	LL	LLV	LL	LLV	LL	LLV	GI	GIE	KA	KAV	GI	GIE	ES	SGS	GI	GIE	GI	GIE	KA	KAV	PL	PLS	DC	DCS	DC	DCS	CL	CLD	CL	CLD	CL	CLD	CL	CLD	LF	EQL	LF	EQL	KI	KIC	MD	MDD			KY
162	LQ	LQP	SA	SAE	LV	LVS	LV	LVS	LV	LVS	IE	IES	AV	AVS	IE	IES	SG	GSV	IE	IES	IE	IES	AV	AVS	LS	LSQ	CS	CSE	CS	CSE	LD	LDV	LD	LDV	LD	LDV	LD	LDV	FP	QLM	FP	QLM	IC	ICG	DD	DDP			YP
163	QP	QPS	AE	AES	VS	VSS	VS	VSS	VS	VSS	ES	ESG	VS	VSD	ES	ESG	GS	SVE	ES	ESG	ES	ESG	VS	VSD	SQ	SQV	SE	SEY	SE	SEY	DV	DVS	DV	DVS	DV	DVS	DV	DVS	PN	LMS	PN	LMS	CG	CGL	DP	DPS			PS
164	PS	PSS	ES	ESL	SS	SSS	SS	SSS	SS	SSS	SG	SGS	SD	SDY	SG	SGS	SV	VEQ	SG	SGS	SG	SGS	SD	SDY	QV	QVI	EY	EYP	EY	EYP	VS	VSK	VS	VSK	VS	VSK	VS	VSK	NE	MSL	NE	MSL	GL	GLC	PS	PSE			ST
165	SS	SSV	SL	SLK	SS	SSI	SS	SSI	SS	SSI	GS	GSV	DY	DYF	GS	GSV	VE	EQA	GS	GSV	GS	GSV	DY	DYF	VI	VIS	YP	YPK	YP	YPK	SK	SKL	SK	SKL	SK	SKL	SK	SKL	EQ	SLT	EQ	SLT	LC	LCG	SE	SEI			TV
166	SV	SVD	LK	LKI	SI	SID	SI	SID	SI	SID	SV	SVE	YF	YFS	SV	SVE	EQ	QAV	SV	SVE	SV	SVE	YF	YFS	IS	ISE	PK	PKP	PK	PKP	KL	KLL	KL	KLL	KL	KLL	KL	KLL	QL	LTA	QL	LTA	CG	CGN	EI	EIC			VS
167	VD	VDS	KI	KIS	ID	IDF	ID	IDF	ID	IDF	VE	VEQ	FS	FSA	VE	VEQ	QA	AVA	VE	VEQ	VE	VEQ	FS	FSA	SE	SEY	KP	KPD	KP	KPD	LL	LLL	LL	LLL	LL	LLL	LL	LLL	LM	TAL	LM	TAL	GN	GNY	IC	ICL			SK
168	DS	DSQ	IS	ISQ	DF	DFG	DF	DFG	DF	DFG	EQ	EQA	SA	SAS	EQ	EQA	AV	VAK	EQ	EQA	EQ	EQA	SA	SAS	EY	EYF	PD	PDC	PD	PDC	LL	LLF	LL	LLF	LL	LLF	LL	LLF	MS	ALF	MS	ALF	NY	NYD	CL	CLS			KD
169	SQ	SQT	SQ	SQA	FG	FGT	FG	FGT	FG	FGT	QA	QAV	AS	ASC	QA	QAV	VA	AKF	QA	QAV	QA	QAV	AS	ASC	YF	YFN	DC	DCT	DC	DCT	LF	LFP	LF	LFP	LF	LFP	LF	LFP	SL	LFP	SL	LFP	YD	YDG	LS	LSE			DG
170	QT	QTA	QA	QAV	GT	GTT	GT	GTT	GT	GTT	AV	AVA	SC	SCV	AV	AVA	AK	KFF	AV	AVA	AV	AVA	SC	SCV	FN	FNA	CT	CTA	CT	CTA	FP	FPN	FP	FPN	FP	FPN	FP	FPN	LT	FPV	LT	FPV	DG	DGN	SE	SEE			GR
171	TA	TAM	AV	AVH	TT	TTM	TT	TTM	TT	TTM	VA	VAK	CV	CVP	VA	VAK	KF	FFS	VA	VAK	VA	VAK	CV	CVP	NA	NAS	TA	TAE	TA	TAE	PN	PNE	PN	PNE	PN	PNE	PN	PNE	TA	PVT	TA	PVT	GN	GNK	EE	EEI			RT
172	AM	AMV	VH	VHG	TM	TMV	TM	TMV	TM	TMV	AK	AKF	VP	VPG	AK	AKF	FF	FSA	AK	AKF	AK	AKF	VP	VPG	AS	ASC	AE	AED	AE	AED	NE	NEQ	NE	NEQ	NE	NEQ	NE	NEQ	AL	VTP	AL	VTP	NK	NKK	EI	EIS			TL
173	MV	MVL	HG	HGA	MV	MVF	MV	MVF	MV	MVF	KF	KFF	PG	PGT	KF	KFF	FS	SAS	KF	KFF	KF	KFF	PG	PGT	SC	SCI	ED	EDR	ED	EDR	EQ	EQL	EQ	EQL	EQ	EQL	EQ	EQL	LF	TPN	LF	TPN	KK	KKN	IS	ISI			LV
174	VL	VLV	GA	GAF	VF	VFI	VF	VFI	VF	VFI	FF	FFS	GT	GTN	FF	FFS	SA	ASC	FF	FFS	FF	FFS	GT	GTN	CI	CIP	DR	DRP	DR	DRP	QL	QLM	QL	QLM	QL	QLM	QL	QLM	FP	PNC	FP	PNC	KN	KND	SI	SIP			VA
175	LV	LVN	AF	AFM	FI	FIN	FI	FIN	FI	FIN	FS	FSA	TN	TNS	FS	FSA	AS	SCV	FS	FSA	FS	FSA	TN	TNS	IP	IPG	RP	RPL	RP	RPL	LM	LMS	LM	LMS	LM	LMS	LM	LMS	PV	NCQ	PV	NCQ	ND	NDL	IP	IPA			AC
176	VN	VNA	FM	FME	IN	INT	IN	INT	IN	INT	SA	SAS	NS	NSA	SA	SAS	SC	CVP	SA	SAS	SA	SAS	NS	NSA	PG	PGV	PL	PLC	PL	PLC	MS	MSL	MS	MSL	MS	MSL	MS	MSL	VT	CQL	VT	CQL	DL	DLI	PA	PAI			CP
177	NA	NAI	ME	MEL	NT	NTI	NT	NTI	NT	NTI	AS	ASC	SA	SAS	AS	ASC	CV	VPG	AS	ASC	AS	ASC	SA	SAS	GV	GVG	LC	LCG	LC	LCG	SL	SLT	SL	SLT	SL	SLT	SL	SLT	TP	QLQ	TP	QLQ	LI	LIL	AI	AIP			PR
178	AI	AIV	EL	ELS	TI	TIY	TI	TIY	TI	TIY	SC	SCV	AS	ASY	SC	SCV	VP	PGA	SC	SCV	SC	SCV	AS	ASY	VG	VGV	CG	CGS	CG	CGS	LT	LTA	LT	LTA	LT	LTA	LT	LTA	PN	LQY	PN	LQY	IL	ILD	IP	IPH			RI
179	IV	IVF	LS	LSE	IY	IYF	IY	IYF	IY	IYF	CV	CVP	SY	SYP	CV	CVP	PG	GAT	CV	CVP	CV	CVP	SY	SYP	GV	GVA	GS	GSD	GS	GSD	TA	TAL	TA	TAL	TA	TAL	TA	TAL	NC	QYL	NC	QYL	LD	LDG	PH	PHK			IL
180	VF	VFK	SE	SED	YF	YFK	YF	YFK	YF	YFK	VP	VPG	YP	YPT	VP	VPG	GA	ATI	VP	VPG	VP	VPG	YP	YPT	VA	VAA	SD	SDN	SD	SDN	AL	ALF	AL	ALF	AL	ALF	AL	ALF	CQ	YLP	CQ	YLP	DG	DGY	HK	HKK			LS
181	FK	FKG	ED	EDG	FK	FKG	FK	FKG	FK	FKG	PG	PGA	PT	PTS	PG	PGA	AT	TIE	PG	PGA	PG	PGA	PT	PTS	AA	AAP	DN	DNK	DN	DNK	LF	LFP	LF	LFP	LF	LFP	LF	LFP	QL	LPL	QL	LPL	GY	GYK	KK	KKY			SP
182	KG	KGL	DG	DGI	KG	KGI	KG	KGI	KG	KGI	GA	GAT	TS	TSL	GA	GAT	TI	IEQ	GA	GAT	GA	GAT	TS	TSL	AP	APQ	NK	NKT	NK	NKT	FP	FPV	FP	FPV	FP	FPV	FP	FPV	LQ	PLA	LQ	PLA	YK	YKM	KY	KYA			PV
183	GL	GLW	GI	GIE	GI	GIW	GI	GIW	GI	GIW	AT	ATI	SL	SLC	AT	ATI	IE	EQK	AT	ATI	AT	ATI	SL	SLC	PQ	PQL	KT	KTY	KT	KTY	PV	PVT	PV	PVT	PV	PVT	PV	PVT	QY	LAA	QY	LAA	KM	KMH	YA	YAV			VC
184	LW	LWE	IE	IEM	IW	IWK	IW	IWK	IW	IWK	TI	TIE	LC	LCQ	TI	TIE	EQ	QKL	TI	TIE	TI	TIE	LC	LCQ	QL	QLC	TY	TYG	TY	TYG	VT	VTP	VT	VTP	VT	VTP	VT	VTP	YL	AAP	YL	AAP	MH	MHP	AV	AVI			CG
185	WE	WEK	EM	EMA	WK	WKI	WK	WKI	WK	WKI	IE	IEQ	CQ	CQL	IE	IEQ	QK	KLC	IE	IEQ	IE	IEQ	CQ	CQL	LC	LCA	YG	YGN	YG	YGN	TP	TPN	TP	TPN	TP	TPN	TP	TPN	LP	APV	LP	APV	HP	HPR	VI	VIC			GT
186	EK	EKA	MA	MAG	KI	KIA	KI	KIA	KI	KIA	EQ	EQK	QL	QLC	EQ	EQK	KL	LCR	EQ	EQK	EQ	EQK	QL	QLC	CA	CAL	GN	GNK	GN	GNK	PN	PNC	PN	PNC	PN	PNC	PN	PNC	PL	PVF	PL	PVF	PR	PRQ	IC	ICS			TD
187	KA	KAF	AG	AGS	IA	IAF	IA	IAF	IA	IAF	QK	QKL	LC	LCK	QK	QKL	LC	CRQ	QK	QKL	QK	QKL	LC	LCK	AL	ALC	NK	NKC	NK	NKC	NC	NCQ	NC	NCQ	NC	NCQ	NC	NCQ	LA	VFS	LA	VFS	RQ	RQF	CS	CSQ			DG
188	AF	AFK	GS	GST	AF	AFN	AF	AFN	AF	AFN	KL	KLC	CK	CKG	KL	KLC	CR	RQC	KL	KLC	KL	KLC	CK	CKG	LC	LCQ	KC	KCN	KC	KCN	CQ	CQL	CQ	CQL	CQ	CQL	CQ	CQL	AA	FSK	AA	FSK	QF	QFG	SQ	SQL			GF
189	FK	FKD	ST	STG	FN	FNT	FN	FNT	FN	FNT	LC	LCR	KG	KGD	LC	LCR	RQ	QCK	LC	LCR	LC	LCR	KG	KGD	CQ	CQG	CN	CNF	CN	CNF	QL	QLQ	QL	QLQ	QL	QLQ	QL	QLQ	AP	SKQ	AP	SKQ	FG	FGN	QL	QLL			FT
190	KD	KDE	TG	TGV	NT	NTE	NT	NTE	NT	NTE	CR	CRQ	GD	GDS	CR	CRQ	QC	CKG	CR	CRQ	CR	CRQ	GD	GDS	QG	QGQ	NF	NFC	NF	NFC	LQ	LQY	LQ	LQY	LQ	LQY	LQ	LQY	PV	KQG	PV	KQG	GN	GNF	LL	LLN			TY
191	DE	DED	GV	GVI	TE	TED	TE	TED	TE	TED	RQ	RQC	DS	DSS	RQ	RQC	CK	KGD	RQ	RQC	RQ	RQC	DS	DSS	GQ	GQK	FC	FCN	FC	FCN	QY	QYL	QY	QYL	QY	QYL	QY	QYL	VF	QGI	VF	QGI	NF	NFH	LN	LNL			YD
192	ED	EDT	VI	VIE	ED	EDT	ED	EDT	ED	EDT	QC	QCK	SS	SSG	QC	QCK	KG	GDP	QC	QCK	QC	QCK	SS	SSG	QK	QKS	CN	CNA	CN	CNA	YL	YLP	YL	YLP	YL	YLP	YL	YLP	FS	LSL	FS	LSL	FH	FHK	NL	NLV			DN
193	DT	DTQ	IE	IED	DT	DTR	DT	DTR	DT	DTR	CK	CKG	SG	SGQ	CK	CKG	GD	DPK	CK	CKG	CK	CKG	SG	SGQ	KS	KSY	NA	NAV	NA	NAV	LP	LPL	LP	LPL	LP	LPL	LP	LPL	SK	SLQ	SK	SLQ	HK	HKV	LV	LVS			NE
194	TQ	TQA	ED	EDI	TR	TRE	TR	TRE	TR	TRE	KG	KGD	GQ	GQN	KG	KGD	DP	PKT	KG	KGD	KG	KGD	GQ	GQN	SY	SYV	AV	AVV	AV	AVV	PL	PLA	PL	PLA	PL	PLA	PL	PLA	KQ	LQT	KQ	LQT	KV	KVE	VS	VSP			EC
195	QA	QAM	DI	DIK	RE	REM	RE	REM	RE	REM	GD	GDP	QN	QNK	GD	GDP	PK	KTK	GD	GDP	GD	GDP	QN	QNK	YV	YVR	VV	VVE	VV	VVE	LA	LAA	LA	LAA	LA	LAA	LA	LAA	QG	QTT	QG	QTT	VE	VED	SP	SPT			CG
196	AM	AMP	IK	IKH	EM	EMP	EM	EMP	EM	EMP	DP	DPK	NK	NKC	DP	DPK	KT	TKC	DP	DPK	DP	DPK	NK	NKC	VR	VRD	VE	VES	VE	VES	AA	AAP	AA	AAP	AA	AAP	AA	AAP	GI	TTF	GI	TTF	ED	EDP	PT	PTC			GI
197	MP	MPF	KH	KHS	MP	MPF	MP	MPF	MP	MPF	PK	PKT	KC	KCQ	PK	PKT	TK	KCA	PK	PKT	PK	PKT	KC	KCQ	RD	RDK	ES	ESN	ES	ESN	AP	APV	AP	APV	AP	APV	AP	APV	LS	TFQ	LS	TFQ	DP	DPS	TC	TCS			IC
198	PF	PFR	HS	HSP	PF	PFS	PF	PFS	PF	PFS	KT	KTK	CQ	CQG	KT	KTK	KC	CAR	KT	KTK	KT	KTK	CQ	CQG	DK	DKN	SN	SNG	SN	SNG	PV	PVF	PV	PVF	PV	PVF	PV	PVF	SL	FQV	SL	FQV	PS	PSE	CS	CSV			CA
199	FR	FRV	SP	SPE	FS	FSM	FS	FSM	FS	FSM	TK	TKC	QG	QGN	TK	TKC	CA	ARN	TK	TKC	TK	TKC	QG	QGN	KN	KNH	NG	NGT	NG	NGT	VF	VFS	VF	VFS	VF	VFS	VF	VFS	LQ	QVA	LQ	QVA	SE	SEK	SV	SVP			AH
200	RV	RVT	PE	PES	SM	SMT	SM	SMT	SM	SMT	KC	KCA	GN	GNS	KC	KCA	AR	RNA	KC	KCA	KC	KCA	GN	GNS	NH	NHF	GT	GTL	GT	GTL	FS	FSK	FS	FSK	FS	FSK	FS	FSK	QT	VAG	QT	VAG	EK	EKC	VP	VPK			HN
201	VT	VTE	ES	ESE	MT	MTK	MT	MTK	MT	MTK	CA	CAR	NS	NSQ	CA	CAR	RN	NAP	CA	CAR	CA	CAR	NS	NSQ	HF	HFC	TL	TLT	TL	TLT	SK	SKQ	SK	SKQ	SK	SKQ	SK	SKQ	TT	AGA	TT	AGA	KC	KCP	PK	PKD			NA
202	TE	TEQ	SE	SEQ	TK	TKE	TK	TKE	TK	TKQ	AR	ARN	SQ	SQE	AR	ARN	NA	APY	AR	ARN	AR	ARN	SQ	SQE	FC	FCE	LT	LTL	LT	LTL	KQ	KQG	KQ	KQG	KQ	KQG	KQ	KQG	TF	GAV	TF	GAV	CP	CPD	KD	KDG			AE
203	EQ	EQE	EQ	EQF	KE	KEE	KE	KEE	KQ	KQE	RN	RNA	QE	QEQ	RN	RNA	AP	PYS	RN	RNA	RN	RNA	QE	QEQ	CE	CET	TL	TLS	TL	TLS	QG	QGI	QG	QGI	QG	QGI	QG	QGI	FQ	AVV	FQ	AVV	PD	PDV	DG	DGF			EQ
204	QE	QES	QF	QFR	EE	EES	EE	EES	QE	QES	NA	NAP	EQ	EQY	NA	NAP	PY	YSG	NA	NAP	NA	NAP	EQ	EQY	ET	ETS	LS	LSH	LS	LSH	GI	GIA	GI	GIA	GI	GIT	GI	GIA	QV	VVP	QV	VVP	DV	DVR	GF	GFV			QR
205	ES	ESK	FR	FRA	ES	ESK	ES	ESK	ES	ESK	AP	APY	QY	QYY	AP	APY	YS	SGY	AP	APY	AP	APY	QY	QYY	TS	TSS	SH	SHF	SH	SHF	IA	IAL	IA	IAL	IT	ITL	IA	IAL	VA	VPV	VA	VPV	VR	VRP	FV	FVT			RT
206	SK	SKP	RA	RAD	SK	SKP	SK	SKP	SK	SKP	PY	PYS	YY	YYD	PY	PYS	SG	GYS	PY	PYS	PY	PYS	YY	YYD	SS	SSN	HF	HFG	HF	HFG	AL	ALS	AL	ALS	TL	TLS	AL	ALS	AG	PVP	AG	PVP	RP	RPD	VT	VTR			TH
207	KP	KPV	AD	ADH	KP	KPV	KP	KPV	KP	KPV	YS	YSG	YD	YDY	YS	YSG	GY	YSG	YS	YSG	YS	YSG	YD	YDY	SN	SNE	FG	FGK	FG	FGK	LS	LSL	LS	LSL	LS	LSL	LS	LSL	GA	VPV	GA	VPV	PD	PDD	TR	TRC			HV
208	PV	PVQ	DH	DHP	PV	PVQ	PV	PVQ	PV	PVQ	SG	SGY	DY	DYS	SG	SGY	YS	SGA	SG	SGY	SG	SGY	DY	DYS	NE	NEP	GK	GKC	GK	GKC	SL	SLQ	SL	SLQ	SL	SLQ	SL	SLQ	AV	PVS	AV	PVS	DD	DDH	RC	RCQ			VS
209	VQ	VQM	HP	HPF	VQ	VQM	VQ	VQM	VQ	VQM	GY	GYS	YS	YSG	GY	GYS	SG	GAF	GY	GYS	GY	GYS	YS	YSG	EP	EPF	KC		KC		LQ	LQT	LQ	LQT	LQ	LQT	LQ	LQT	VV	VSP	VV	VSP	DH	DHT	CQ	CQL			SK
210	QM	QMM	PF	PFL	QM	QMM	QM	QMM	QM	QMM	YS	YSG	SG	SGA	YS	YSG	GA	AFH	YS	YSG	YS	YSG	SG	SGA	PF	PFY					QT	QTT	QT	QTT	QT	QTT	QT	QTT	VP	SPV	VP	SPV	HT	HTG	QL	QLD			KK
211	MM	MMY	FL	FLF	MM	MMC	MM	MMC	MM	MMC	SG	SGA	GA	GAF	SG	SGA	AF	FHC	SG	SGA	SG	SGA	GA	GAF	FY	FYD					TT	TTF	TT	TTF	TT	TTF	TT	TTF	PV	PVP	PV	PVP	TG	TGR	LD	LDM			KH
212	MY	MYQ	LF	LFL	MC	MCM	MC	MCM	MC	MCM	GA	GAF	AF	AFR	GA	GAF	FH	HCL	GA	GAF	GA	GAG	AF	AFR	YD	YDS					TF	TFQ	TF	TFQ	TF	TFQ	TF	TFQ	VP	VPF	VP	VPF	GR	GRH	DM	DMQ			HD
213	YQ	YQI	FL	FLI	CM	CMN	CM	CMN	CM	CMN	AF	AFH	FR	FRC	AF	AFH	HC	CLK	AF	AFH	AG	AGF	FR	FRC	DS	DSD					FQ	FQV	FQ	FQV	FQ	FQV	FQ	FQV	PV	PFS	PV	PFS	RH	RHP	MQ	MQD			DG
214	QI	QIG	LI	LIK	MN	MNN	MN	MNN	MN	MNN	FH	FHC	RC	RCL	FH	FHC	CL	LKD	FH	FHC	GF	GFF	RC	RCL	SD	SDG					QV	QVA	QV	QVA	QV	QVA	QV	QVA	VS	FSM	VS	FSM	HP	HPT	QD	QDC			GK
215	IG	IGL	IK	IKH	NN	NNS	NN	NNS	NN	NNS	HC	HCL	CL	CLA	HC	HCL	LK	KDG	HC	HCL	FF	FFV	CL	CLA	DG	DGA					VA	VAG	VA	VAG	VA	VAG	VA	VAG	SP	SMP	SP	SMP	PT	PTE	DC	DCS			KC
216	GL	GLF	KH	KHN	NS	NSF	NS	NSF	NS	NSF	CL	CLK	LA	LAE	CL	CLK	KD	DGK	CL	CLK	FV	FVC	LA	LAE	GA	GAF					AG	AGA	AG	AGA	AG	AGA	AG	AGA	PV	MPE	PV	MPE	TE	TED	CS	CSE			CR
217	LF	LFR	HN	HNP	SF	SFN	SF	SFN	SF	SFN	LK	LKD	AE	AEG	LK	LKD	DG	GKG	LK	LKD	VC	VCV	AE	AEG	AF	AFR					GA	GAV	GA	GAV	GA	GAV	GA	GAV	VP	PEL	VP	PEL	ED	EDD	SE	SEP			RQ
218	FR	FRV	NP	NPT	FN	FNV	FN	FNV	FN	FNV	KD	KDG	EG	EGA	KD	KDG	GK	KGD	KD	KDG	CV	CVF	EG	EGA	FR	FRC					AV	AVV	AV	AVV	AV	AVV	AV	AVV	PF	ELA	PF	ELA	DD	DDN	EP	EPG			QE
219	RV	RVA	PT	PTN	NV	NVA	NV	NVA	NV	NVA	DG	DGK	GA	GAG	DG	DGK	KG	GDV	DG	DGK	VF	VFV	GA	GAG	RC	RCL					VV	VVP	VV	VVP	VV	VVP	VV	VVP	FS	LAS	FS	LAS	DN	DNR	PG	PGQ			EI
220	VA	VAS	TN	TNT	VA	VAT	VA	VAT	VA	VAT	GK	GKG	AG	AGE	GK	GKG	GD	DVA	GK	GKG	FV	FVY	AG	AGE	CL	CLK					VP	VPV	VP	VPV	VP	VPV	VP	VPV	SM	AST	SM	AST	NR	NRC	GQ	GQK			IP
221	AS	ASM	NT	NTI	AT	ATL	AT	ATL	AT	ATL	KG	KGD	GE	GEV	KG	KGD	DV	VAF	KG	KGD	VY	VYF	GE	GEV	LK	LKD					PV	PVP	PV	PVP	PV	PVP	PV	PVP	MP	STS	MP	STS	RC	RCS	QK	QKN			PE
222	SM	SMA	TI	TIV	TL	TLP	TL	TLP	TL	TLP	GD	GDV	EV	EVA	GD	GDV	VA	AFV	GD	GDV	YF	YFG	EV	EVA	KD	KDG					VP	VPV	VP	VPV	VP	VPV	VP	VPV	PE	TST	PE	TST	CS	CSK	KN	KNC			EI
223	MA	MAS	IV	IVY	LP	LPA	LP	LPA	LP	LPA	DV	DVA	VA	VAF	DV	DVA	AF	FVK	DV	DVA	FG	FGG	VA	VAF	DG	DGV					PV	PVS	PV	PVS	PV	PVS	PV	PVS	EL	STS	EL	STS	SK	SKY	NC	NCT			ID
224	AS	ASE	VY	VYF	PA	PAE	PA	PAE	PA	PAE	VA	VAF	AF	AFV	VA	VAF	FV	VKH	VA	VAF	GG	GGD	AF	AFV	GV	GVA					VS	VSP	VS	VSP	VS	VSP	VS	VSP	LA	TSH	LA	TSH	KY	KYK	CT	CTC			DC
225	SE	SEK	YF	YFG	AE	AEK	AE	AEK	AE	AEK	AF	AFV	FV	FVK	AF	AFV	VK	KHT	AF	AFV	GD	GDA	FV	FVK	VA	VAD					SP	SPV	SP	SPV	SP	SPV	SP	SPV	AS	SHL	AS	SHL	YK	YKK	TC	TCS			CD
226	EK	EKM	FG	FGR	EK	EKM	EK	EKM	EK	EKM	FV	FVK	VK	VKH	FV	FVK	KH	HTT	FV	FVK	DA	DAT	VK	VKH	AD	ADV					PV	PVP	PV	PVP	PV	PVP	PV	PVP	ST	HLI	ST	HLI	KK	KKM	CS	CST			DQ
227	KM	KMK	GR	GRY	KM	KMK	KM	KMK	KM	KMK	VK	VKH	KH	KHS	VK	VKH	HT	TTV	VK	VKH	AT	ATH	KH	KHS	DV	DVA					VP	VPF	VP	VPF	VP	VPF	VP	VPF	TS	LIL	TS	LIL	KM	KMC	ST	STL			QY
228	MK	MKI	RY	RYW	MK	MKI	MK	MKI	MK	MKI	KH	KHT	HS	HST	KH	KHT	TT	TVN	KH	KHT	TH	THG	HS	HST	VA	VAF					PF	PFS	PF	PFS	PF	PFS	PF	PFS	ST	ILA	ST	ILA	MC	MCK	TL	TLS			YP
229	KI	KIL	YW	YWS	KI	KIL	KI	KIL	KI	KIL	HT	HTT	ST	STV	HT	HTT	TV	VNE	HT	HTT	HG	HGS	ST	STV	AF	AFL					FS	FSM	FS	FSM	FS	FSM	FS	FSM	TS	LAL	TS	LAL	CK	CKK	LS	LSE			PT
230	IL	ILE	WS	WSP	IL	ILE	IL	ILE	IL	ILE	TT	TTV	TV	TVP	TT	TTV	VN	NEN	TT	TTV	GS	GSS	TV	TVP	FL	FLD					SM	SMP	SM	SMP	SM	SMP	SM	SMP	SH	ALS	SH	ALS	KK	KKL	SE	SEY			TR
231	LE	LEL	SP		LE	LEL	LE	LEL	LE	LEL	TV	TVN	VP	VPE	TV	TVN	NE	ENA	TV	TVN	SS	SSL	VP	VPE	LD	LDH					MP	MPE	MP	MPE	MP	MPE	MP	MPE	HL	LSE	HL	LSE	KL	KLL	EY	EYS			RK
232	EL	ELP			EL	ELP	EL	ELP	EL	ELP	VN	VNE	PE	PEN	VN	VNE	EN	NAP	VN	VNE	SL	SLT	PE	PEN	DH	DHL					PE	PEL	PE	PEL	PE	PEL	PE	PEL	LI	SEH	LI	SEH	LL	LLS	YS	YSR			KT
233	LP	LPF			LP	LPY	LP	LPY	LP	LPY	NE	NEN	EN	ENT	NE	NEN	NA	APD	NE	NEN	LT	LTP	EN	ENT	HL	HLA					EL	ELA	EL	ELA	EL	ELA	EL	ELA	IL	EHF	IL	EHF	LS	LSR	SR	SRQ			TT
234	PF	PFA			PY	PYA	PY	PYA	PY	PYA	EN	ENA	NT	NTD	EN	ENA	AP	PDQ	EN	ENA	TP	TPE	NT	NTD	LA	LAI					LA	LAS	LA	LAS	LA	LAS	LA	LAS	LA	HFY	LA	HFY	SR	SRF	RQ	RQC			TG
235	FA	FAS			YA	YAS	YA	YAS	YA	YAS	NA	NAP	TD	TDG	NA	NAP	PD	DQK	NA	NAP	PE	PEN	TD	TDG	AI	AIM					AS	AST	AS	AST	AS	AST	AS	AST	AL	FYT	AL	FYT	RF	RFG	QC	QCA			GG
236	AS	ASG			AS	ASG	AS	ASG	AS	ASG	AP	APD	DG	DGR	AP	APD	DQ	QKD	AP	APD	EN	ENA	DG	DGR	IM	IME					ST	STS	ST	STS	ST	STS	ST	STS	LS	YTS	LS	YTS	FG	FGN	CA	CAM			GK
237	SG	SGT			SG	SGD	SG	SGD	SG	SGD	PD	PDQ	GR	GRT	PD	PDQ	QK	KDE	PD	PDQ	NA	NAP	GR	GRT	ME	MEA					TS	TST	TS	TST	TS	TST	TS	TST	SE	TSL	SE	TSL	GN	GNC	AM	AMS			KL
238	GT	GTM			GD	GDL	GD	GDL	GD	GDL	DQ	DQK	RT	RTL	DQ	DQK	KD	DEY	DQ	DQK	AP	APD	RT	RTL	EA	EAT					ST	STS	ST	STS	ST	STS	ST	STS	EH	SLY	EH	SLY	NC	NCP	MS	MSH			LL
239	TM	TMS			DL	DLS	DL	DLS	DL	DLS	QK	QKD	TL	TLS	QK	QKD	DE	EYE	QK	QKD	PD	PDQ	TL	TLS	AT	ATE					TS	TSH	TS	TSH	TS	TSH	TS	TSH	HF	LYF	HF	LYF	CP	CPK	SH	SHQ			LV
240	MS	MSM			LS	LSM	LS	LSM	LS	LSM	KD	KDE	LS	LST	KD	KDE	EY	YEL	KD	KDE	DQ	DQK	LS	LST	TE	TES					SH	SHL	SH	SHL	SH	SHL	SH	SHL	FY	YFT	FY	YFT	PK	PKV	HQ	HQV			VR
241	SM	SML			SM	SML	SM	SML	SM	SML	DE	DEY	ST	STW	DE	DEY	YE	ELL	DE	DEY	QK	QKD	ST	STW	ES	ESE					HL	HLI	HL	HLI	HL	HLI	HL	HLI	YT	FTL	YT	FTL	KV	KVV	QV	QVV			RC
242	ML	MLV			ML	MLV	ML	MLV	ML	MLV	EY	EYE	TW	TWA	EY	EYE	EL	LLC	EY	EYE	KD	KDE	TW	TWA	SE	SEQ					LI	LIL	LI	LIL	LI	LIL	LI	LIL	TS	TLE	TS	TLE	VV	VVA	VV	VVF			CP
243	LV	LVL			LV	LVL	LV	LVL	LV	LVL	YE	YEL	WA	WAQ	YE	YEL	LL	LCL	YE	YEL	DE	DEY	WA	WAQ	EQ	EQQ					IL	ILA	IL	ILA	IL	ILA	IL	ILA	SL	LER	SL	LER	VA	VAF	VF	VFN			PR
244	VL	VLL			VL	VLL	VL	VLL	VL	VLL	EL	ELL	AQ	AQQ	EL	ELL	LC	CLD	EL	ELL	EY	EYE	AQ	AQQ	QQ	QQE					LA	LAL	LA	LAL	LA	LAL	LA	LAL	LY	ERA	LY	ERA	AF	AFD	FN	FNW			RI
245	LL	LLP			LL	LLP	LL	LLP	LL	LLP	LL	LLC	QQ	QQF	LL	LLC	CL	LDG	LL	LLC	YE	YEL	QQ	QQF	QE	QEY					AL	ALS	AL	ALS	AL	ALS	AL	ALS	YF	RAG	YF	RAG	FD	FDD	NW	NWR			IL
246	LP	LPD			LP	LPD	LP	LPD	LP	LPD	LC	LCL	QF	QFR	LC	LCL	LD	DGS	LC	LCL	EL	ELL	QF	QFR	EY	EYE					LS	LSE	LS	LSE	LS	LSE	LS	LSE	FT	AGA	FT	AGA	DD	DDY	WR	WRT			LL
247	PD	PDE			PD	PDE	PD	PDE	PD	PDE	CL	CLD	FR	FRS	CL	CLD	DG	GSR	CL	CLD	LL	LLC	FR	FRS	YE	YEL					SE	SEH	SE	SEH	SE	SEH	SE	SEH	TL	GAF	TL	GAF	DY	DYV	RT	RTE			LP
248	DE	DEV			DE	DEV	DE	DEV	DE	DEV	LD	LDG	RS	RSK	LD	LDG	GS	SRQ	LD	LDG	LC	LCL	RS	RSK	EL	ELL					EH	EHF	EH	EHF	EH	EHF	EH	EHF	LE	AFN	LE	AFN	YV	YVA	TE	TEN			PV
249	EV	EVS			EV	EVS	EV	EVS	EV	EVS	DG	DGS	SK	SKD	DG	DGS	SR	RQP	DG	DGS	CL	CLD	SK	SKD	LL	LLC					HF	HFY	HF	HFY	HF	HFY	HF	HFY	ER	FNM	ER	FNM	VA	VAT	EN	ENF			VC
250	VS	VSG			VS	VSG	VS	VSG	VS	VSG	GS	GSR	KD	KDF	GS	GSR	RQ	QPV	GS	GSR	LD	LDG	KD	KDF	LC	LCP					FY	FYT	FY	FYT	FY	FYT	FY	FYT	RA	NMT	RA	NMT	AT	ATC	NF	NFC			CG
251	SG	SGL			SG	SGL	SG	SGL	SG	SGL	SR	SRQ	DF	DFQ	SR	SRQ	QP	PVD	SR	SRQ	DG	DGS	DF	DFQ	CP	CPD					YT	YTS	YT	YTS	YT	YTS	YT	YTS	AG	MTI	AG	MTI	TC	TCT	FC	FCS			GT
252	GL	GLE			GL	GLE	GL	GLE	GL	GLE	RQ	RQP	FQ	FQL	RQ	RQP	PV	VDN	RQ	RQP	GS	GSR	FQ	FQL	PD	PDG					TS	TSL	TS	TSL	TS	TSL	TS	TSL	GA	TIP	GA	TIP	CT	CTE	CS	CSV			TD
253	LE	LEQ			LE	LER	LE	LER	LE	LER	QP	QPV	QL	QLL	QP	QPV	VD	DNY	QP	QPV	SR	SRQ	QL	QLL	DG	DGT					SL	SLY	SL	SLY	SL	SLY	SL	SLY	AF	IPS	AF	IPS	TE	TED	SV	SVG			DG
254	EQ	EQL			ER	ERI	ER	ERI	ER	ERI	PV	PVD	LL	LLC	PV	PVD	DN	NYK	PV	PVD	RQ	RQP	LL	LLC	GT	GTT					LY	LYF	LY	LYF	LY	LYF	LY	LYF	FN	PSM	FN	PSM	ED	EDM	VG	VGK			GF
255	QL	QLE			RI	RIE	RI	RIE	RI	RIE	VD	VDN	LC	LCR	VD	VDN	NY	YKT	VD	VDN	QP	QPV	LC	LCR	TT	TTA					YF	YFT	YF	YFT	YF	YFT	YF	YFT	NM	SML	NM	SML	DM	DMC	GK	GKC			FT
256	LE	LES			IE	IEK	IE	IEK	IE	IEK	DN	DNY	CR	CRN	DN	DNY	YK	KTC	DN	DNY	PV	PVD	CR	CRN	TA	TAE					FT	FTL	FT	FTL	FT	FTL	FT	FTL	MT	MLT	MT	MLT	MC	MCN	KC	KCS			TY
257	ES	ESI			EK	EKT	EK	EKT	EK	EKT	NY	NYK	RN	RNG	NY	NYK	KT	TCN	NY	NYK	VD	VDN	RN	RNG	AE	AEL					TL	TLE	TL	TLE	TL	TLE	TL	TLE	TI	LTT	TI	LTT	CN	CNC	CS	CSA			YD
258	SI	SII			KT	KTI	KT	KTI	KT	KTI	YK	YKT	NG	NGS	YK	YKT	TC	CNW	YK	YKT	DN	DNY	NG	NGS	EL	ELS					LE	LER	LE	LER	LE	LER	LE	LER	IP	TTA	IP	TTA	NC	NCV	SA	SAN			DN
259	II	IIN			TI	TIN	TI	TIN	TI	TIN	KT	KTC	GS	GST	KT	KTC	CN	NWA	KT	KTC	NY	NYK	GS	GST	LS	LSK					ER	ERA	ER	ERA	ER	ERA	ER	ERA	PS	TAT	PS	TAT	CV	CVV	AN	ANQ			NE
260	IN	INF			IN	INF	IN	INF	IN	INF	TC	TCN	ST	STA	TC	TCN	NW	WAR	TC	TCN	YK	YKT	ST	STA	SK	SKY					RA	RAG	RA	RAG	RA	RAG	RA	RAG	SM	ATL	SM	ATL	VV	VVN	NQ	NQI			EC
261	NF	NFE			NF	NFD	NF	NFD	NF	NFD	CN	CNW	TA	TAD	CN	CNW	WA	ARV	CN	CNW	KT	KTC	TA	TAD	KY	KYN					AG	AGA	AG	AGA	AG	AGA	AG	AGA	ML	TLA	ML	TLA	VN	VNS	QI	QIY			CG
262	FE	FEK			FD	FDK	FD	FDK	FD	FDK	NW	NWA	AD	ADV	NW	NWA	AR	RVA	NW	NWA	TC	TCN	AD	ADV	YN	YNT					GA	GAF	GA	GAF	GA	GAF	GA	GAF	LT	LAQ	LT	LAQ	NS	NSS	IY	IYE			GI
263	EK	EKL			DK	DKL	DK	DKL	DK	DKL	WA	WAR	DV	DVT	WA	WAR	RV	VAA	WA	WAR	CN	CNW	DV	DVT	NT	NTC					AF	AFN	AF	AFN	AF	AFN	AF	AFN	TT	AQK	TT	AQK	SS	SSQ	YE	YEE			IC
264	KL	KLT			KL	KLR	KL	KLR	KL	KLR	AR	ARV	VT	VTE	AR	ARV	VA	AAH	AR	ARV	NW	NWA	VT	VTE	TC	TCN					FN	FNM	FN	FNM	FN	FNM	FN	FNM	TA	QKI	TA	QKI	SQ	SQS	EE	EEC			CA
265	LT	LTE			LR	LRE	LR	LRE	LR	LRE	RV	RVA	TE	TEW	RV	RVA	AA	AHA	RV	RVA	WA	WAR	TE	TEW	CN	CNL					NM	NMT	NM	NMT	NM	NMT	NM	NMT	AT	KIT	AT	KIT	QS	QSD	EC	ECG			AH
266	TE	TEW			RE	REW	RE	REW	RE	REW	VA	VAA	EW	EWR	VA	VAA	AH	HAV	VA	VAA	AR	ARV	EW	EWR	NL	NLG					MT	MTI	MT	MTI	MT	MTI	MT	MTI	TL	ITQ	TL	ITQ	SD	SDL	CG	CGS			HN
267	EW	EWT			EW	EWT	EW	EWT	EW	EWT	AA	AAH	WR	WRT	AA	AAH	HA	AVV	AA	AAH	RV	RVA	WR	WRT	LG	LGK					TI	TIP	TI	TIP	TI	TIP	TI	TIP	LA	TQV	LA	TQV	DL	DLV	GS	GSP			NA
268	WT	WTS			WT	WTS	WT	WTS	WT	WTS	AH	AHA	RT	RTC	AH	AHA	AV	VVA	AH	AHA	VA	VAA	RT	RTC	GK	GKG					IP	IPS	IP	IPS	IP	IPS	IP	IPS	AQ	QVG	AQ	QVG	LV	LVS	SP	SPC			AQ
269	TS	TSS			TS	TST	TS	TST	TS	TST	HA	HAV	TC	TCH	HA	HAV	VV	VAR	HA	HAV	AA	AAH	TC	TCH	KG	KGP					PS	PSM	PS	PSM	PS	PSM	PS	PSM	QK	VGS	QK	VGS	VS	VSS	PC	PCI			QH
270	SS	SSN			ST	STN	ST	STN	ST	STN	AV	AVV	CH	CHL	AV	AVV	VA	ARD	AV	AVV	AH	AHA	CH	CHL	GP	GPG					SM	SML	SM	SML	SM	SML	SM	SML	KI	GSL	KI	GSL	SS	SSC	CI	CIK			HG
271	SN	SNV			TN	TNA	TN	TNA	TN	TNA	VV	VVA	HL	HLA	VV	VVA	AR	RDD	VV	VVA	HA	HAV	HL	HLA	PG	PGR					ML	MLT	ML	MLT	ML	MLT	ML	MLT	IT	SLY	IT	SLY	SC	SCI	IK	IKT			GT
272	NV	NVM			NA	NAM	NA	NAM	NA	NAM	VA	VAR	LA	LAR	VA	VAR	RD	DDN	VA	VAR	AV	AVV	LA	LAR	GR	GRG					LT	LTT	LT	LTT	LT	LTT	LT	LTT	TQ	LYH	TQ	LYH	CI	CIC	KT	KTC			TE
273	VM	VME			AM	AMA	AM	AMA	AM	AMA	AR	ARD	AR	ARV	AR	ARD	DD	DNK	AR	ARD	VV	VVA	AR	ARV	RG	RGI					TT	TTA	TT	TTA	TT	TTA	TT	TTA	QV	YHE	QV	YHE	IC	ICS	TC	TCS			EV
274	ME	MEE			MA	MAK	MA	MAK	MA	MAK	RD	RDD	RV	RVP	RD	RDD	DN	NKV	RD	RDD	VA	VAR	RV	RVP	GI	GII					TA	TAT	TA	TAT	TA	TAT	TA	TAT	VG	HED	VG	HED	CS	CST	CS	CSN			VK
275	EE	EER			AK	AKK	AK	AKK	AK	AKK	DD	DDN	VP	VPA	DD	DDN	NK	KVE	DD	DDN	AR	ARD	VP	VPA	II	IIT					AT	ATL	AT	ATL	AT	ATL	AT	ATL	GS	EDL	GS	EDL	ST	STL	SN	SNP			KK
276	ER	ERK			KK	KKS	KK	KKS	KK	KKS	DN	DNK	PA	PAR	DN	DNK	KV	VED	DN	DNK	RD	RDD	PA	PAR	IT	ITR					TL	TLA	TL	TLA	TL	TLA	TL	TLA	SL	DLP	SL	DLP	TL	TLN	NP	NPE			KS
277	RK	RKI			KS	KSM	KS	KSM	KS	KSM	NK	NKV	AR	ARA	NK	NKV	VE	EDI	NK	NKV	DD	DDN	AR	ARA	TR	TRH					LA	LAQ	LA	LAQ	LA	LAQ	LA	LAQ	LY	LPI	LY	LPI	LN	LNQ	PE	PEY			SH
278	KI	KIK			SM	SMK	SM	SMK	SM	SMK	KV	KVE	RA	RAV	KV	KVE	ED	DIW	KV	KVE	DN	DNK	RA	RAV	RH	RHN					AQ	AQK	AQ	AQK	AQ	AQK	AQ	AQK	YH	PIT	YH	PIT	NQ	NQY	EY	EYS			HD
279	IK	IKV			MK	MKV	MK	MKV	MK	MKV	VE	VED	AV	AVV	VE	VED	DI	IWS	VE	VED	NK	NKV	AV	AVV	HN	HNF					QK	QKI	QK	QKI	QK	QKI	QK	QKI	HE	ITL	HE	ITL	QY	QYS	YS	YSC			DG
280	KV	KVY			KV	KVY	KV	KVY	KV	KVY	ED	EDI	VV	VVV	ED	EDI	IW	WSF	ED	EDI	KV	KVE	VV	VVV	NF	NFQ					KI	KIT	KI	KIT	KI	KIT	KI	KIT	ED	TLS	ED	TLS	YS	YSR	SC	SCS			GR
281	VY	VYL			VY	VYL	VY	VYL	VY	VYL	DI	DIW	VV	VVR	DI	DIW	WS	SFL	DI	DIW	VE	VED	VV	VVR	FQ	FQK					IT	ITQ	IT	ITQ	IT	ITQ	IT	ITQ	DL	LSA	DL	LSA	SR	SRD	CS	CSS			RC
282	YL	YLP			YL	YLP	YL	YLP	YL	YLP	IW	IWS	VR	VRP	IW	IWS	SF	FLS	IW	IWS	ED	EDI	VR	VRP	QK	QKI					TQ	TQV	TQ	TQV	TQ	TQV	TQ	TQV	LP	SAA	LP	SAA	RD	RDC	SS	SSH			CK
283	LP	LPR			LP	LPR	LP	LPR	LP	LPR	WS	WSF	RP	RPD	WS	WSF	FL	LSK	WS	WSF	DI	DIW	RP	RPD	KI	KIT					QV	QVG	QV	QVG	QV	QVG	QV	QVG	PI	AAL	PI	AAL	DC	DCV	SH	SHC			KE
284	PR	PRM			PR	PRM	PR	PRM	PR	PRM	SF	SFL	PD	PDT	SF	SFL	LS	SKA	SF	SFL	IW	IWS	PD	PDT	IT	ITN					VG	VGS	VG	VGS	VG	VGS	VG	VGS	IT	ALR	IT	ALR	CV	CVL	HC	HCT			ER
285	RM	RMK			RM	RMK	RM	RMK	RM	RMK	FL	FLS	DT	DTD	FL	FLS	SK	KAQ	FL	FLS	WS	WSF	DT	DTD	TN	TNK					GS	GSL	GS	GSL	GS	GSL	GS	GSL	TL	LRS	TL	LRS	VL	VLS	CT	CTY			RS
286	MK	MKM			MK	MKI	MK	MKI	MK	MKI	LS	LSK	TD	TDG	LS	LSK	KA	AQS	LS	LSK	SF	SFL	TD	TDG	NK	NKF					SL	SLY	SL	SLY	SL	SLY	SL	SLY	LS	RSS	LS	RSS	LS	LSK	TY	TYG			ST
287	KM	KME			KI	KIE	KI	KIE	KI	KIE	SK	SKA	DG	DGT	SK	SKA	AQ	QSD	SK	SKA	FL	FLS	DG	DGT	KF	KFL					LY	LYH	LY	LYH	LY	LYH	LY	LYH	SA	SSP	SA	SSP	SK	SKG	YG	YGC			TP
288	ME	MEE			IE	IEE	IE	IEE	IE	IEE	KA	KAQ	GT	GTA	KA	KAQ	QS	SDF	KA	KAQ	LS	LSK	GT	GTA	FL	FLT					YH	YHE	YH	YHE	YH	YHE	YH	YHE	AA	SPR	AA	SPR	KG	KGD	GC	GCF			PL
289	EE	EEK			EE	EEK	EE	EEK	EE	EEK	AQ	AQS	TA	TAV	AQ	AQS	SD	DFG	AQ	AQS	SK	SKA	TA	TAV	LT	LTM					HE	HED	HE	HED	HE	HED	HE	HED	AL	PRV	AL	PRV	GD	GDP	CF	CFC			LD
290	EK	EKY			EK	EKY	EK	EKY	EK	EKY	QS	QSD	AV	AVF	QS	QSD	DF	FGV	QS	QSD	KA	KAQ	AV	AVF	TM	TMI					ED	EDL	ED	EDL	ED	EDL	ED	EDL	LR	RVV	LR	RVV	DP	DPG	FC	FCP			DC
291	KY	KYN			KY	KYN	KY	KYN	KY	KYN	SD	SDF	VF	VFQ	SD	SDF	FG	GVD	SD	SDF	AQ	AQS	VF	VFQ	MI	MIQ					DL	DLP	DL	DLP	DL	DLP	DL	DLP	RS	VVL	RS	VVL	PG	PGE	CP	CPE			CT
292	YN	YNL			YN	YNL	YN	YNL	YN	YNL	DF	DFG	FQ	FQL	DF	DFG	GV	VDT	DF	DFG	QS	QSD	FQ	FQL	IQ	IQR					LP	LPI	LP	LPI	LP	LPI	LP	LPI	SS	VLE	SS	VLE	GE	GEW	PE	PEG			TQ
293	NL	NLT			NL	NLT	NL	NLT	NL	NLT	FG	FGV	QL	QLL	FG	FGV	VD	DTK	FG	FGV	SD	SDF	QL	QLL	QR	QRL					PI	PIT	PI	PIT	PI	PIT	PI	PIT	SP	LEE	SP	LEE	EW	EWR	EG	EGT			QY
294	LT	LTS			LT	LTS	LT	LTS	LT	LTS	GV	GVD	LL	LLN	GV	GVD	DT	TKS	GV	GVD	DF	DFG	LL	LLN	RL	RLF					IT	ITL	IT	ITL	IT	ITL	IT	ITL	PR	EEG	PR	EEG	WR	WRT	GT	GTV			YL
295	TS	TSV			TS	TSI	TS	TSI	TS	TSI	VD	VDT	LN	LNQ	VD	VDT	TK	KSD	VD	VDT	FG	FGV	LN	LNQ	LF	LFG					TL	TLS	TL	TLS	TL	TLS	TL	TLS	RV	EGR	RV	EGR	RT	RTK	TV	TVL			LS
296	SV	SVL			SI	SIL	SI	SIL	SI	SIL	DT	DTK	NQ	NQG	DT	DTK	KS	SDF	DT	DTK	GV	GVD	NQ	NQG	FG	FGR					LS	LSA	LS	LSA	LS	LSA	LS	LSA	VV	GRA	VV	GRA	TK	TKE	VL	VLD			SN
297	VL	VLM			IL	ILM	IL	ILM	IL	ILM	TK	TKS	QG	QGQ	TK	TKS	SD	DFH	TK	TKS	VD	VDT	QG	QGQ	GR	GRK					SA	SAA	SA	SAA	SA	SAA	SA	SAA	VL	RAA	VL	RAA	KE	KEL	LD	LDD			NT
298	LM	LMA			LM	LMA	LM	LMA	LM	LMA	KS	KSD	GQ	GQQ	KS	KSD	DF	FHL	KS	KSD	DT	DTK	GQ	GQQ	RK	RKG					AA	AAL	AA	AAL	AA	AAL	AA	AAL	LE	AAL	LE	AAL	EL	ELC	DD	DDI			TQ
299	MA	MAM			MA	MAL	MA	MAL	MA	MAL	SD	SDF	QQ	QQR	SD	SDF	FH	HLF	SD	SDF	TK	TKS	QQ	QQR	KG	KGK					AL	ALR	AL	ALR	AL	ALR	AL	ALR	EE	ALK	EE	ALK	LC	LCY	DI	DIS			QN
300	AM	AMG			AL	ALG	AL	ALG	AL	ALG	DF	DFH	QR	QRF	DF	DFH	HL	LFG	DF	DFH	KS	KSD	QR	QRF	GK	GKE					LR	LRS	LR	LRS	LR	LRS	LR	LRS	EG	LKL	EG	LKL	CY	CYQ	IS	ISK			NG
301	MG	MGI			LG	LGM	LG	LGM	LG	LGM	FH	FHL	RF	RFN	FH	FHL	LF	FGP	FH	FHL	SD	SDF	RF	RFN	KE	KER					RS	RSS	RS	RSS	RS	RSS	RS	RSS	GR	KLF	GR	KLF	YQ	YQE	SK	SKN			GE
302	GI	GIT			GM	GMT	GM	GMT	GM	GMT	HL	HLF	FN	FNG	HL	HLF	FG	GPP	HL	HLF	DF	DFH	FN	FND	ER	ERA					SS	SSP	SS	SSP	SS	SSP	SS	SSP	RA	LFL	RA	LFL	QE	QEC	KN	KNR			EA
303	IT	ITD			MT	MTD	MT	MTD	MT	MTD	LF	LFG	NG	NGV	LF	LFG	GP	PPG	LF	LFG	FH	FHL	ND	NDV	RA	RAR					SP	SPR	SP	SPR	SP	SPR	SP	SPR	AA	FLT	AA	FLT	EC	ECP	NR	NRT			AI
304	TD	TDV			TD	TDL	TD	TDL	TD	TDL	FG	FGP	GV	GVG	FG	FGP	PP	PGK	FG	FGP	HL	HLF	DV	DVG	AR	ARF					PR	PRV	PR	PRV	PR	PRV	PR	PRV	AL	LTV	AL	LTV	CP	CPS	RT	RTC			IT
305	DV	DVF			DL	DLF	DL	DLF	DL	DLF	GP	GPP	VG	VGA	GP	GPP	PG	GKK	GP	GPP	LF	LFG	VG	VGA	RF	RFE					RV	RVV	RV	RVV	RV	RVV	RV	RVV	LK	TVH	LK	TVH	PS	PSN	TC	TCV			TA
306	VF	VFS			LF	LFS	LF	LFS	LF	LFS	PP	PPG	GA	GAQ	PP	PPG	GK	KKD	PP	PPG	FG	FGP	GA	GAQ	FE	FEL					VV	VVL	VV	VVL	VV	VVL	VV	VVL	KL	VHI	KL	VHI	SN	SNM	CV	CVH			AC
307	FS	FSS			FS	FSR	FS	FSR	FS	FSR	PG	PGK	AQ	AQF	PG	PGK	KK	KDP	PG	PGK	GP	GPP	AQ	AQF	EL	ELF					VL	VLE	VL	VLE	VL	VLE	VL	VLE	LF	HIG	LF	HIG	NM	NME	VH	VHL			CP
308	SS	SSS			SR	SRS	SR	SRS	SR	SRS	GK	GKK	QF	QFQ	GK	GKK	KD	DPV	GK	GKK	PP	PPG	QF	QFQ	LF	LFN					LE	LEE	LE	LEE	LE	LEE	LE	LEE	FL	IGA	FL	IGA	ME	MEY	HL	HLE			PF
309	SS	SSA			RS	RSA	RS	RSA	RS	RSA	KK	KKD	FQ	FQM	KK	KKD	DP	PVL	KK	KKD	PG	PGK	FQ	FQM	FN	FNS					EE	EEG	EE	EEG	EE	EEG	EE	EEG	LT	GAG	LT	GAG	EY	EYM	LE	LEQ			FI
310	SA	SAN			SA	SAN	SA	SAN	SA	SAN	KD	KDP	QM	QMF	KD	KDP	PV	VLK	KD	KDP	GK	GKK	QM	QMF	NS	NSS					EG	EGR	EG	EGR	EG	EGR	EG	EGR	TV	AGS	TV	AGS	YM	YME	EQ	EQC			IL
311	AN	ANL			AN	ANL	AN	ANL	AN	ANL	DP	DPV	MF	MFD	DP	DPV	VL	LKD	DP	DPV	KK	KKD	MF	MFD	SS	SSS					GR	GRA	GR	GRA	GR	GRA	GR	GRA	VH	GSP	VH	GSP	ME	MEC	QC	QCP			LQ
312	NL	NLS			NL	NLT	NL	NLT	NL	NLT	PV	PVL	FD	FDS	PV	PVL	LK	KDL	PV	PVL	KD	KDP	FD	FDS	SS	SSF					RA	RAA	RA	RAA	RA	RAA	RA	RAA	HI	SPD	HI	SPD	EC	ECG	CP	CPC			QE
313	LS	LSG			LT	LTG	LT	LTG	LT	LTG	VL	VLK	DS	DST	VL	VLK	KD	DLL	VL	VLK	DP	DPV	DS	DST	SF	SFG					AA	AAL	AA	AAL	AA	AAL	AA	AAL	IG	PDF	IG	PDF	CG	CGN	PC	PCT			EV
314	SG	SGI			TG	TGI	TG	TGI	TG	TGI	LK	LKD	ST	STA	LK	LKD	DL	LLF	LK	LKD	PV	PVL	ST	STA	FG	FGG					AL	ALK	AL	ALK	AL	ALK	AL	ALK	GA	DFQ	GA	DFQ	GN	GNS	CT	CTL			VC
315	GI	GIS			GI	GIS	GI	GIS	GI	GIS	KD	KDL	TA	TAY	KD	KDL	LL	LFK	KD	KDL	VL	VLK	TA	TAY	GG	GGK					LK	LKL	LK	LKL	LK	LKL	LK	LKL	AG	FQS	AG	FQS	NS	NSC	TL	TLN			CG
316	IS	ISS			IS	ISS	IS	ISS	IS	ISS	DL	DLL	AY	AYG	DL	DLL	LF	FKD	DL	DLL	LK	LKD	AY	AYG	GK	GKN					KL	KLF	KL	KLF	KL	KLF	KL	KLF	GS	QSF	GS	QSF	SC	SCA	LN	LNG			GT
317	SS	SSA			SS	SSV	SS	SSV	SS	SSV	LL	LLF	YG	YGA	LL	LLF	FK	KDS	LL	LLF	KD	KDL	YG	YGA	KN	KNL					LF	LFL	LF	LFL	LF	LFL	LF	LFL	SP	SFL	SP	SFL	CA	CAD	NG	NGE			TD
318	SA	SAE			SV	SVD	SV	SVD	SV	SVD	LF	LFK	GA	GAQ	LF	LFK	KD	DSA	LF	LFK	DL	DLL	GA	GAQ	NL	NLL					FL	FLT	FL	FLT	FL	FLT	FL	FLT	PD	FLS	PD	FLS	AD	ADT	GE	GET			DG
319	AE	AES			VD	VDN	VD	VDN	VD	VDN	FK	FKD	AQ	AQN	FK	FKD	DS	SAI	FK	FKD	LL	LLF	AQ	AQN	LL	LLF					LT	LTV	LT	LTV	LT	LTV	LT	LTV	DF	LSV	DF	LSV	DT	DTC	ET	ETY			GV
320	ES	ESL			DN	DNL	DN	DNL	DN	DNL	KD	KDS	QN	QNL	KD	KDS	SA	AIM	KD	KDS	LF	LFK	QN	QNL	LF	LFR					TV	TVH	TV	TVH	TV	TVH	TV	TVH	FQ	SVS	FQ	SVS	TC	TCA	TY	TYA			VT
321	SL	SLK			NL	NLM	NL	NLM	NL	NLM	DS	DSA	NL	NLM	DS	DSA	AI	IML	DS	DSA	FK	FKD	NL	NLM	FR	FRD					VH	VHI	VH	VHI	VH	VHI	VH	VHI	QS	VSA	QS	VSA	CA	CAD	YA	YAP			TY
322	LK	LKI			LM	LMI	LM	LMI	LM	LMI	SA	SAI	LM	LMF	SA	SAI	IM	MLK	SA	SAI	KD	KDS	LM	LMF	RD	RDA					HI	HIG	HI	HIG	HI	HIG	HI	HIG	SF	SAD	SF	SAD	AD	ADP	AP	APG			YS
323	KI	KIS			MI	MIS	MI	MIS	MI	MIS	AI	AIM	MF	MFR	AI	AIM	ML	LKR	AI	AIM	DS	DSA	MF	MFR	DA	DAT					IG	IGA	IG	IGA	IG	IGA	IG	IGA	FL	ADV	FL	ADV	DP	DPE	PG	PGD			SN
324	IS	ISQ			IS	ISD	IS	ISD	IS	ISD	IM	IML	FR	FRD	IM	IML	LK	KRV	IM	IML	SA	SAI	FR	FRD	AT	ATQ					GA	GAG	GA	GAG	GA	GAG	GA	GAG	LS	DVT	LS	DVT	PE	PER	GD	GDT			ND
325	SQ	SQA			SD	SDA	SD	SDA	SD	SDA	ML	MLK	RD	RDS	ML	MLK	KR	RVP	ML	MLK	AI	AIM	RD	RDS	TQ	TQH					AG	AGS	AG	AGS	AG	AGS	AG	AGS	SV	VTA	SV	VTA	ER	ERS	DT	DTM			DC
326	QA	QAV			DA	DAV	DA	DAV	DA	DAV	LK	LKR	DS	DST	LK	LKR	RV	VPS	LK	LKR	IM	IML	DS	DST	QH	QHL					GS	GSP	GS	GSP	GS	GSP	GS	GSP	VS	TAG	VS	TAG	RS	RSK	TM	TMK			CS
327	AV	AVH			AV	AVH	AV	AVH	AV	AVH	KR	KRV	ST	STT	KR	KRV	VP	PSL	KR	KRV	ML	MLK	ST	STT	HL	HLQ					SP	SPD	SP	SPD	SP	SPD	SP	SPD	SA	AGL	SA	AGL	SK	SKI	MK	MKA			SL
328	VH	VHA			VH	VHG	VH	VHG	VH	VHG	RV	RVP	TT	TTK	RV	RVP	PS	SLM	RV	RVP	LK	LKR	TT	TTK	LQ	LQL					PD	PDF	PD	PDF	PD	PDF	PD	PDF	AD	GLQ	AD	GLQ	KI	KIC	KA	KAA			LC
329	HA	HAA			HG	HGV	HG	HGV	HG	HGV	VP	VPS	TK	TKL	VP	VPS	SL	LMD	VP	VPS	KR	KRV	TK	TKL	QL	QLL					DF	DFQ	DF	DFQ	DF	DFQ	DF	DFQ	DV	LQL	DV	LQL	IC	ICK	AA	AAC			CA
330	AA	AAH			GV	GVF	GV	GVF	GV	GVF	PS	PSL	KL	KLI	PS	PSL	LM	MDS	PS	PSL	RV	RVP	KL	KLV	LL	LLE					FQ	FQS	FQ	FQS	FQ	FQS	FQ	FQS	VT	QLS	VT	QLS	CK	CKA	AC	ACR			AH
331	AH	AHA			VF	VFM	VF	VFM	VF	VFM	SL	SLM	LI	LIA	SL	SLM	MD	DSQ	SL	SLM	VP	VPS	LV	LVA	LE	LEE					QS	QSF	QS	QSF	QS	QSF	QS	QSF	TA	LSV	TA	LSV	KA	KAP	CR	CRT			HN
332	HA	HAE			FM	FME	FM	FME	FM	FME	LM	LMD	IA	IAV	LM	LMD	DS	SQL	LM	LMD	PS	PSL	VA	VAV	EE	EEQ					SF	SFL	SF	SFL	SF	SFL	SF	SFL	AG	SVS	AG	SVS	AP	APC	RT	RTC			NI
333	AE	AEI			ME	MEV	ME	MEV	ME	MEV	MD	MDS	AV	AVT	MD	MDS	SQ	QLY	MD	MDS	SL	SLM	AV	AVT	EQ	EQL					FL	FLS	FL	FLS	FL	FLS	FL	FLS	GL	VSD	GL	VSD	PC	PCT	TC	TCK			IE
334	EI	EIN			EV	EVN	EV	EVN	EV	EVN	DS	DSQ	VT	VTS	DS	DSQ	QL	LYL	DS	DSQ	LM	LMD	VT	VTS	QL	QLE					LS	LSV	LS	LSV	LS	LSV	LS	LSV	LQ	SDT	LQ	SDT	CT	CTD	CK	CKC			EL
335	IN	INE			VN	VNE	VN	VNE	VN	VNE	SQ	SQL	TS	TSQ	SQ	SQL	LY	YLG	SQ	SQL	MD	MDS	TS	TSQ	LE	LEI					SV	SVS	SV	SVS	SV	SVS	SV	SVS	QL	DTR	QL	DTR	TD	TDG	KC	KCT			LG
336	NE	NEA			NE	NEE	NE	NEE	NE	NEE	QL	QLY	SQ	SQN	QL	QLY	YL	LGF	QL	QLY	DS	DSQ	SQ	SQN	EI	EIA					VS	VSA	VS	VSA	VS	VSA	VS	VSA	LS	TRM	LS	TRM	DG	DGC	CT	CTM			GT
337	EA	EAG			EE	EEG	EE	EEG	EE	EEG	LY	LYL	QN	QNY	LY	LYL	LG	GFE	LY	LYL	SQ	SQL	QN	QNY	IA	IAY					SA	SAD	SA	SAD	SA	SAD	SA	SAD	SV	RMM	SV	RMM	GC	GCF	TM	TMG			TS
338	AG	AGR			EG	EGT	EG	EGT	EG	EGT	YL	YLG	NY	NYQ	YL	YLG	GF	FEY	YL	YLG	QL	QLY	NY	NYQ	AY	AYV					AD	ADV	AD	ADV	AD	ADV	AD	ADV	VS	MMI	VS	MMI	CF	CFC	MG	MGQ			SV
339	GR	GRE			GT	GTE	GT	GTE	GT	GTE	LG	LGF	YQ	YQA	LG	LGF	FE	EYY	LG	LGF	LY	LYL	YQ	YQA	YV	YVL					DV	DVT	DV	DVT	DV	DVT	DV	DVT	SD	MIS	SD	MIS	FC	FCP	GQ	GQW			VA
340	RE	REV			TE	TEA	TE	TEA	TE	TEA	GF	GFE	QA	QAW	GF	GFE	EY	YYS	GF	GFE	YL	YLG	QA	QAW	VL	VLG					VT	VTA	VT	VTA	VT	VTA	VT	VTA	DT	IST	DT	IST	CP	CPP	QW	QWN			AK
341	EV	EVV			EA	EAT	EA	EAT	EA	EAT	FE	FEY	AW	AWL	FE	FEY	YY	YSA	FE	FEY	LG	LGF	AW	AWL	LG	LGL					TA	TAG	TA	TAG	TA	TAG	TA	TAG	TR	STA	TR	STA	PP	PPG	WN	WNC			KK
342	VV	VVG			AT	ATG	AT	ATG	AT	ATG	EY	EYY	WL	WLG	EY	EYY	YS	SAI	EY	EYY	GF	GFE	WL	WLG	GL	GLD					AG	AGL	AG	AGL	AG	AGL	AG	AGL	RM	TAV	RM	TAV	PG	PGT	NC	NCK			KH
343	VG	VGS			TG	TGS	TG	TGS	TG	TGS	YY	YYS	LG	LGD	YY	YYS	SA	AIQ	YY	YYS	FE	FEY	LG	LGD	LD	LDY					GL	GLQ	GL	GLQ	GL	GLQ	GL	GLQ	MM	AVI	MM	AVI	GT	GTI	CK	CKE			HD
344	GS	GSA			GS	GST	GS	GST	GS	GST	YS	YSA	GD	GDE	YS	YSA	AI	IQS	YS	YSA	EY	EYY	GD	GDE	DY	DYV					LQ	LQL	LQ	LQL	LQ	LQL	LQ	LQL	MI	VIE	MI	VIE	TI	TIL	KE	KEL			DG
345	SA	SAE			ST	STG	ST	STG	ST	STG	SA	SAI	DE	DEY	SA	SAI	IQ	QSM	SA	SAI	YY	YYS	DE	DEY	YV	YVA					QL	QLS	QL	QLS	QL	QLS	QL	QLS	IS	IED	IS	IED	IL	ILD	EL	ELP			GR
346	AE	AEA			TG	TGA	TG	TGA	TG	TGA	AI	AIQ	EY	EYL	AI	AIQ	QS	SMR	AI	AIQ	YS	YSA	EY	EYL	VA	VAL					LS	LSV	LS	LSV	LS	LSV	LS	LSV	ST	EDA	ST	EDA	LD	LDD	LP	LPC			RC
347	EA	EAG			GA	GAI	GA	GAI	GA	GAI	IQ	IQS	YL	YLH	IQ	IQS	SM	MRK	IQ	IQS	SA	SAI	YL	YLH	AL	ALL					SV	SVS	SV	SVS	SV	SVS	SV	SVS	TA	DAE	TA	DAE	DD	DDL	PC	PCP			CR
348	AG	AGV			AI	AIG	AI	AIG	AI	AIG	QS	QSM	LH	LHA	QS	QSM	MR	RKD	QS	QSM	AI	AIQ	LH	LHG	LL	LLK					VS	VSD	VS	VSD	VS	VSD	VS	VSD	AV	AEL	AV	AEL	DL	DLG	CP	CPG			RE
349	GV	GVD			IG	IGN	IG	IGN	IG	IGN	SM	SMR	HA	HAM	SM	SMR	RK	KDQ	SM	SMR	IQ	IQS	HG	HGM	LK	LKG					SD	SDT	SD	SDT	SD	SDT	SD	SDT	VI	ELS	VI	ELS	LG	LGG	PG	PGR			EE
350	VD	VDA			GN	GNI	GN	GNI	GN	GNI	MR	MRK	AM	AMQ	MR	MRK	KD	DQL	MR	MRK	QS	QSM	GM	GMQ	KG	KGL					DT	DTR	DT	DTR	DT	DTR	DT	DTR	IE	LSL	IE	LSL	GG	GGK	GR	GRC			EV
351	DA	DAA			NI	NIK	NI	NIK	NI	NIK	RK	RKD	MQ	MQA	RK	RKD	DQ	QLT	RK	RKD	SM	SMR	MQ	MQA	GL	GLG					TR	TRM	TR	TRM	TR	TRM	TR	TRM	ED	SLA	ED	SLA	GK	GKK	RC	RCS			VP
352	AA	AAS			IK	IKH	IK	IKH	IK	IKH	KD	KDQ	QA	QAL	KD	KDQ	QL	LTP	KD	KDQ	MR	MRK	QA	QAL	LG	LGH					RM	RMM	RM	RMM	RM	RMM	RM	RMM	DA	LAA	DA	LAA	KK	KKC	CS	CSL			PE
353	AS	ASV			KH	KHS	KH	KHS	KH	KHS	DQ	DQL	AL	ALS	DQ	DQL	LT	TPS	DQ	DQL	RK	RKD	AL	ALS	GH	GHE					MM	MMI	MM	MMI	MM	MMI	MM	MMI	AE	AAS	AE	AAS	KC	KCV	SL	SLE			EL
354	SV	SVS			HS	HSL	HS	HSL	HS	HSL	QL	QLT	LS	LSC	QL	QLT	TP	PSP	QL	QLT	KD	KDQ	LS	LSC	HE	HEG					MI	MIS	MI	MIS	MI	MIS	MI	MIS	EL	ASN	EL	ASN	CV	CVP	LE	LEG			LD
355	VS	VSE			SL	SLE	SL	SLE	SL	SLE	LT	LTP	SC	SCD	LT	LTP	PS	SPR	LT	LTP	DQ	DQL	SC	SCD	EG	EGS					IS	IST	IS	IST	IS	IST	IS	IST	LS	SNV	LS	SNV	VP	VPR	EG	EGG			DC
356	SE	SEE			LE	LEL	LE	LEL	LE	LEL	TP	TPS	CD	CDP	TP	TPS	SP	PRE	TP	TPS	QL	QLT	CD	CDP	GS	GSS					ST	STA	ST	STA	ST	STA	ST	STA	SL	NVG	SL	NVG	PR	PRD	GG	GGS			CS
357	EE	EEF			EL	ELE	EL	ELE	EL	ELE	PS	PSP	DP	DPN	PS	PSP	PR	REN	PS	PSP	LT	LTP	DP	DPN	SS	SSL					TA	TAV	TA	TAV	TA	TAV	TA	TAV	LA	VGL	LA	VGL	RD	RDS	GS	GSF			SK
358	EF	EFR			LE	LEE	LE	LEE	LE	LEE	SP	SPR	PN	PNT	SP	SPR	RE	ENR	SP	SPR	TP	TPS	PN	PNT	SL	SLD					AV	AVI	AV	AVI	AV	AVI	AV	AVI	AA	GLV	AA	GLV	DS	DSC	SF	SFV			KY
359	FR	FRA			EE	EEF	EE	EEF	EE	EEF	PR	PRE	NT	NTL	PR	PRE	EN	NRI	PR	PRE	PS	PSP	NT	NTL	LD	LDN					VI	VIE	VI	VIE	VI	VIE	VI	VIE	AS	LVR	AS	LVR	SC	SCP	FV	FVT			YK
360	RA	RAD			EF	EFR	EF	EFR	EF	EFR	RE	REN	TL	TLP	RE	REN	NR	RIQ	RE	REN	SP	SPR	TL	TLP	DN	DNR					IE	IED	IE	IED	IE	IED	IE	IED	SN	VRA	SN	VRA	CP	CPC	VT	VTT			KT
361	AD	ADH			FR	FRA	FR	FRA	FR	FRA	EN	ENR	LP	LPE	EN	ENR	RI	IQW	EN	ENR	PR	PRE	LP	LPE	NR	NRV					ED	EDA	ED	EDA	ED	EDA	ED	EDA	NV	RAA	NV	RAA	PC	PCM	TT	TTF			TS
362	DH	DHP			RA	RAD	RA	RAD	RA	RAD	NR	NRI	PE	PES	NR	NRI	IQ	QWC	NR	NRI	RE	REN	PE	PES	RV	RVV					DA	DAE	DA	DAE	DA	DAE	DA	DAE	VG	AAL	VG	AAL	CM	CMF	TF	TFD			ST
363	HP	HPF			AD	ADH	AD	ADH	AD	ADH	RI	RIQ	ES	ESL	RI	RIQ	QW	WCA	RI	RIQ	EN	ENR	ES	ESL	VV	VVR					AE	AEL	AE	AEL	AE	AEL	AE	AEL	GL	ALL	GL	ALL	MF	MFQ	FD	FDS			TL
364	PF	PFL			DH	DHP	DH	DHP	DH	DHP	IQ	IQW	SL	SLN	IQ	IQW	WC	CAV	IQ	IQW	NR	NRI	SL	SLN	VR	VRW					EL	ELS	EL	ELS	EL	ELS	EL	ELS	LV	LLE	LV	LLE	FQ	FQG	DS	DSR			LK
365	FL	FLF			HP	HPF	HP	HPF	HP	HPF	QW	QWC	LN	LNW	QW	QWC	CA	AVG	QW	QWC	RI	RIQ	LN	LNW	RW	RWC					LS	LSL	LS	LSL	LS	LSL	LS	LSL	VR	LEE	VR	LEE	QG	QGK	SR	SRS			KD
366	LF	LFC			PF	PFL	PF	PFL	PF	PFL	WC	WCA	NW	NWC	WC	WCA	AV	VGK	WC	WCA	IQ	IQW	NW	NWC	WC	WCC					SL	SLA	SL	SLA	SL	SLA	SL	SLA	RA	EEL	RA	EEL	GK	GKV	RS	RSY			DG
367	FC	FCI			FL	FLF	FL	FLF	FL	FLF	CA	CAV	WC	WCV	CA	CAV	VG	GKD	CA	CAV	QW	QWC	WC	WCV	CC	CCI					LA	LAA	LA	LAA	LA	LAA	LA	LAA	AA	ELF	AA	ELF	KV	KVY	SY	SYR			GR
368	CI	CIK			LF	LFF	LF	LFF	LF	LFF	AV	AVG	CV	CVV	AV	AVG	GK	KDE	AV	AVG	WC	WCA	CV	CVV	CI	CIS					AA	AAS	AA	AAS	AA	AAS	AA	AAS	AL	LFL	AL	LFL	VY	VYS	YR	YRF			RQ
369	IK	IKH			FF	FFI	FF	FFI	FF	FFI	VG	VGK	VV	VVS	VG	VGK	KD	DEK	VG	VGK	CA	CAV	VV	VVS	IS	ISN					AS	ASN	AS	ASN	AS	ASN	AS	ASN	LL	FLA	LL	FLA	YS	YSS	RF	RFH			QV
370	KH	KHI			FI	FIR	FI	FIR	FI	FIR	GK	GKD	VS	VST	GK	GKD	DE	EKS	GK	GKD	AV	AVG	VS	VST	SN	SNA					SN	SNV	SN	SNV	SN	SNV	SN	SNV	LE	LAP	LE	LAP	SS	SSG	FH	FHG			VV
371	HI	HIA			IR	IRY	IR	IRY	IR	IRY	KD	KDE	ST	STE	KD	KDE	EK	KSK	KD	KDE	VG	VGK	ST	STE	NA	NAE					NV	NVG	NV	NVG	NV	NVG	NV	NVG	EE	APV	EE	APV	SG	SGG	HG	HGV			VA
372	IA	IAT			RY	RYN	RY	RYN	RY	RYN	DE	DEK	TE	TEE	DE	DEK	KS	SKC	DE	DEK	GK	GKD	TE	TEE	AE	AEL					VG	VGL	VG	VGL	VG	VGL	VG	VGL	EL	PVC	EL	PVC	GG	GGT	GV	GVC			AC
373	AT	ATN			YN	YNP	YN	YNP	YN	YNP	EK	EKS	EE	EEI	EK	EKS	SK	KCD	EK	EKS	KD	KDE	EE	EEI	EL	ELR					GL	GLV	GL	GLV	GL	GLV	GL	GLV	LF	VCQ	LF	VCQ	GT	GTY	VC	VCT			CT
374	TN	TNA			NP	NPT	NP	NPT	NP	NPT	KS	KSK	EI	EIW	KS	KSK	KC	CDR	KS	KSK	DE	DEK	EI	EIW	LR	LRK					LV	LVR	LV	LVR	LV	LVR	LV	LVR	FL	CQQ	FL	CQQ	TY	TYS	CT	CTY			TM
375	NA	NAV			PT	PTN	PT	PTN	PT	PTN	SK	SKC	IW	IWK	SK	SKC	CD	DRW	SK	SKC	EK	EKS	IW	IWK	RK	RKC					VR	VRA	VR	VRA	VR	VRA	VR	VRA	LA	QQV	LA	QQV	YS	YST	TY	TYI			MI
376	AV	AVL			TN	TNA	TN	TNA	TN	TNA	KC	KCD	WK	WKC	KC	KCD	DR	RWS	KC	KCD	KS	KSK	WK	WKC	KC	KCE					RA	RAA	RA	RAA	RA	RAA	RA	RAA	AP	QVP	AP	QVP	ST	STP	YI	YIL			IY
377	VL	VLF			NA	NAI	NA	NAI	NA	NAI	CD	CDR	KC	KCG	CD	CDR	RW	WSV	CD	CDR	SK	SKC	KC	KCG	CE	CEE					AA	AAL	AA	AAL	AA	AAL	AA	AAL	PV	VPA	PV	VPA	TP	TPC	IL	ILM			YD
378	LF	LFF			AI	AIL	AI	AIL	AI	AIL	DR	DRW	CG	CGE	DR	DRW	WS	SVV	DR	DRW	KC	KCD	CG	CGE	EE	EEW					AL	ALL	AL	ALL	AL	ALL	AL	ALL	VC	PAW	VC	PAW	PC	PCQ	LM	LMK			DP
379	FF	FFG			IL	ILF	IL	ILF	IL	ILF	RW	RWS	GE	GEM	RW	RWS	SV	VVS	RW	RWS	CD	CDR	GE	GEM	EW	EWA					LL	LLE	LL	LLE	LL	LLE	LL	LLE	CQ	AWM	CQ	AWM	CQ	CQN	MK	MKS			PV
380	FG	FGR			LF	LFF	LF	LFF	LF	LFF	WS	WSV	EM	EMG	WS	WSV	VV	VSN	WS	WSV	DR	DRW	EM	EMG	WA	WAL					LE	LEE	LE	LEE	LE	LEE	LE	LEE	QQ	WMD	QQ	WMD	QN	QNC	KS	KSS			VC
381	GR	GRC			FF	FFG	FF	FFG	FF	FFG	SV	SVV	MG	MGT	SV	SVV	VS	SNG	SV	SVV	RW	RWS	MG	MGT	AL	ALS					EE	EEL	EE	EEL	EE	EEL	EE	EEL	QV	MDD	QV	MDD	NC	NCT	SS	SSS			CA
382	RC	RCV			FG	FGR	FG	FGR	FG	FGR	VV	VVS	GT	GTA	VV	VVS	SN	NGD	VV	VVS	WS	WSV	GT	GTA	LS	LSI					EL	ELF	EL	ELF	EL	ELF	EL	ELF	VP	DDV	VP	DDV	CT	CTC	SS	SSL			AT
383	CV	CVS			GR	GRY	GR	GRY	GR	GRY	VS	VSN	TA	TAF	VS	VSN	NG	GDV	VS	VSN	SV	SVV	TA	TAF	SI	SIK					LF	LFL	LF	LFL	LF	LFL	LF	LFL	PA	DVL	PA	DVL	TC	TCK	SL	SLP			TN
384	VS	VSP			RY	RYW	RY	RYW	RY	RYW	SN	SNG	AF	AFR	SN	SNG	GD	DVE	SN	SNG	VV	VVS	AF	AFR	IK	IKS					FL	FLA	FL	FLA	FL	FLA	FL	FLA	AW	VLR	AW	VLR	CK	CKG	LP	LPH			NG
385	SP				YW	YWS	YW	YWS	YW	YWS	NG	NGD	FR	FRS	NG	NGD	DV	VEC	NG	NGD	VS	VSN	FR	FRS	KS	KSD					LA	LAP	LA	LAP	LA	LAP	LA	LAP	WM	LRE	WM	LRE	KG	KGG	PH	PHN			GV
386					WS	WSP	WS	WSP	WS	WSP	GD	GDV	RS	RSK	GD	GDV	VE	ECT	GD	GDV	SN	SNG	RS	RSK	SD	SDP					AP	APV	AP	APV	AP	APV	AP	APV	MD	REG	MD	REG	GG	GGH	HN	HNG			VT
387					SP		SP		SP		DV	DVE	SK	SKN	DV	DVE	EC	CTV	DV	DVE	NG	NGD	SK	SKN	DP	DPL					PV	PVC	PV	PVC	PV	PVC	PV	PVC	DD	EGV	DD	EGV	GH	GHW	NG	NGT			TY
388											VE	VEC	KN	KNL	VE	VEC	CT	TVV	VE	VEC	GD	GDV	KN	KNL	PL	PLV					VC	VCQ	VC	VCQ	VC	VCQ	VC	VCQ	DV	GVH	DV	GVH	HW	HWS	GT	GTL			YA
389											EC	ECT	NL	NLK	EC	ECT	TV	VVD	EC	ECT	DV	DVE	NL	NLK	LV	LVC					CQ	CQQ	CQ	CQQ	CQ	CQQ	CQ	CQQ	VL	VHL	VL	VHL	WS	WSC	TL	TLM			AS
390											CT	CTV	LK	LKP	CT	CTV	VV	VDE	CT	CTV	VE	VEC	LK	LKP	VC	VCV					QQ	QQV	QQ	QQV	QQ	QQV	QQ	QQV	LR	HLP	LR	HLP	SC	SCI	LM	LMA			SE
391											TV	TVV	KP	KPE	TV	TVV	VD	DET	TV	TVV	EC	ECT	KP	KPE	CV	CVQ					QV	QVP	QV	QVP	QV	QVP	QV	QVP	RE	LPH	RE	LPH	CI	CIS	MA	MAI			EC
392											VV	VVD	PE	PEI	VV	VVD	DE	ETK	VV	VVD	CT	CTV	PE	PEI	VQ	VQG					VP	VPA	VP	VPA	VP	VPA	VP	VPA	EG	SHF	EG	PHL	IS	ISL	AI	AIY			CT
393											VD	VDE	EI	EIQ	VD	VDE	ET	TKD	VD	VDE	TV	TVV	EI	EIQ	QG	QGT					PA	PAW	PA	PAW	PA	PAW	PA	PAW	GV	HFT	GV	HLS	SL	SLP	IY	IYE			TL
394											DE	DET	IQ	IQC	DE	DET	TK	KDC	DE	DET	VV	VVD	IQ	IQC	GT	GTS					AW	AWM	AW	AWM	AW	AWM	AW	AWM	VH	FTY	VH	LSH	LP	LPC	YE	YEK			LC
395											ET	ETK	QC	QCI	ET	ETK	KD	DCI	ET	ETK	VD	VDE	QC	QCI	TS	TSM					WM	WMD	WM	WMD	WM	WMD	WM	WMD	HL	TYT	HL	SHF	PC	PCS	EK	EKS			CA
396											TK	TKD	CI	CIS	TK	TKD	DC	CII	TK	TKD	DE	DET	CI	CIS	SM	SMA					MD	MDD	MD	MDD	MD	MDD	MD	MDD	LP	YTD	LP	HFT	CS	CSG	KS	KSG			AH
397											KD	KDC	IS	ISA	KD	KDC	CI	IIK	KD	KDC	ET	ETK	IS	ISA	MA	MAN					DD	DDV	DD	DDV	DD	DDV	DD	DDV	PH	TDV	PH	FTY	SG	SGS	SG	SGY			HN
398											DC	DCI	SA	SAK	DC	DCI	II	IKI	DC	DCI	TK	TKD	SA	SAK	AN	ANC					DV	DVL	DV	DVL	DV	DVL	DV	DVL	SH	DVN	HL	TYT	GS	GSC	GY	GYS			NL
399											CI	CII	AK	AKT	CI	CII	IK	KIM	CI	CII	KD	KDC	AK	AKT	NC	NCI					VL	VLR	VL	VLR	VL	VLR	VL	VLR	HF	VNV	LS	YTD	SC	SCS	YS	YSH			LE
400											II	IIK	KT	KTK	II	IIK	KI	IMK	II	IIK	DC	DCI	KT	KTK	CI	CIE					LR	LRE	LR	LRE	LR	LRE	LR	LRE	FT	NVV	SH	TDV	CS	CSI	SH	SHS			EQ
401											IK	IKI	TK	TKE	IK	IKI	IM	MKG	IK	IKI	CI	CII	TK	TKE	IE	IEM					RE	REG	RE	REG	RE	REG	RE	REG	TY	VVV	HF	DVN	SI	SID	HS	HSE			QR
402											KI	KIM	KE	KEE	KI	KIM	MK	KGE	KI	KIM	II	IIK	KE	KEE	EM	EMI					EG	EGV	EG	EGV	EG	EGV	EG	EGV	YT	VVH	FT	VNV	ID	IDG	SE	SET			RT
403											IM	IMK	EE	EEC	IM	IMK	KG	GEA	IM	IMK	IK	IKI	EE	EEC	MI	MIK					GV	GVH	GV	GVH	GV	GVH	GV	GVH	TD	VHK	TY	NVV	DG	DGG	ET	ETS			TN
404											MK	MKG	EC	ECM	MK	MKG	GE	EAD	MK	MKG	KI	KIM	EC	ECM	IK	IKS					VH	VHL	VH	VHL	VH	VHL	VH	VHL	DV	HKD	YT	VVV	GG	GGF	TS	TSL			NL
405											KG	KGE	CM	CME	KG	KGE	EA	ADA	KG	KGE	IM	IMK	CM	CME	KS	KSS					HL	HLP	HL	HLP	HL	HLP	HL	HLP	VN	KDY	TD	VVH	GF	GFH	SL	SLS			LG
406											GE	GEA	ME	MEM	GE	GEA	AD	DAV	GE	GEA	MK	MKG	ME	MEM	SS	SSE					LP	LPH	LP	LPH	LP	LPH	LP	LPH	NV	DYV	DV	VHK	FH	FHI	LS	LSA			GK
407											EA	EAD	EM	EMI	EA	EAD	DA	AVA	EA	EAD	KG	KGE	EM	EMI	SE	SEA					PH	PHL	PH	PHL	PH	PHL	PH	PHL	VV	YVL	VN	HKD	HI	HIK	SA	SAI			KR
408											AD	ADA	MI	MIQ	AD	ADA	AV	VAL	AD	ADA	GE	GEA	MI	MIQ	EA	EAD					HL	HLS	HL	HLS	HL	HLS	HL	HLS	VV	VLV	NV	KDY	IK	IKT	AI	AII			RK
409											DA	DAV	IQ	IQK	DA	DAV	VA	ALD	DA	DAV	EA	EAD	IQ	IQK	AD	ADA					LS	LSH	LS	LSH	LS	LSH	LS	LSH	VH	LVP	VV	DYV	KT	KTF	II	IIY			KN
410											AV	AVA	QK	QKK	AV	AVA	AL	LDG	AV	AVA	AD	ADA	QK	QKK	DA	DAV					SH	SHF	SH	SHF	SH	SHF	SH	SHF	HK	VPC	VV	YVL	TF	TFD	IY	IYL			NG
411											VA	VAL	KK	KKE	VA	VAL	LD	DGG	VA	VAL	DA	DAV	KK	KKE	AV	AVS					HF	HFT	HF	HFT	HF	HFT	HF	HFT	KD	PCK	VH	VLV	FD	FDN	YL	YLS			GR
412											AL	ALD	KE	KEI	AL	ALD	DG	GGL	AL	ALD	AV	AVA	KE	KEI	VS	VSL					FT	FTY	FT	FTY	FT	FTY	FT	FTY	DY	CKL	HK	LVP	DN	DNK	LS	LST			RC
413											LD	LDG	EI	EID	LD	LDG	GG	GLV	LD	LDG	VA	VAL	EI	EID	SL	SLD					TY	TYT	TY	TYT	TY	TYT	TY	TYT	YV	KLK	KD	VPC	NK	NKK	ST	STK			CE
414											DG	DGG	ID	IDV	DG	DGG	GL	LVY	DG	DGG	AL	ALD	ID	IDV	LD	LDA					YT	YTD	YT	YTD	YT	YTD	YT	YTD	VL	LKL	DY	PCK	KK	KKF	TK	TKD			EE
415											GG	GGL	DV	DVV	GG	GGL	LV	VYT	GG	GGL	LD	LDG	DV	DVV	DA	DAT					TD	TDV	TD	TDI	TD	TDV	TD	TDV	LV	KLR	YV	CKL	KF	KFN	KD	KDK			ED
416											GL	GLV	VV	VVA	GL	GLV	VY	YTA	GL	GLV	DG	DGG	VV	VVA	AT	ATH					DV	DVS	DI	DIS	DV	DVN	DV	DVN	VP	LRS	VL	KLK	FN	FNF	DK	DKI			DI
417											LV	LVY	VA	VAL	LV	LVY	YT	TAG	LV	LVY	GG	GGL	VA	VAL	TH	THV					VS	VSV	IS	ISV	VN	VNV	VN	VNV	PC	RST	LV	LKL	NF	NFH	KI	KIV			IT
418											VY	VYT	AL	ALG	VY	VYT	TA	AGV	VY	VYT	GL	GLV	AL	ALG	HV	HVY					SV	SVV	SV	SVV	NV	NVV	NV	NVV	CK	STM	VP	KLR	FH	FHG	IV	IVI			TK
419											YT	YTA	LG	LGG	YT	YTA	AG	GVC	YT	YTA	LV	LVY	LG	LGG	VY	VYI					VV	VVV	VV	VVV	VV	VVV	VV	VVV	KL	TMA	PC	LRS	HG	HGN	VI	VIS			KE
420											TA	TAG	GG	GGA	TA	TAG	GV	VCG	TA	TAG	VY	VYT	GG	GGV	YI	YIA					VV	VVH	VV	VVH	VV	VVH	VV	VVH	LK		CK	RST	GN	GNC	IS	ISQ			EH
421											AG	AGV	GA	GAD	AG	AGV	VC	CGL	AG	AGV	YT	YTA	GV	GVD	IA	IAG					VH	VHK	VH	VHK	VH	VHK	VH	VHK	KL		KL	STM	NC	NCH	SQ	SQN			HC
422											GV	GVC	AD	ADI	GV	GVC	CG	GLV	GV	GVC	TA	TAG	VD	VDI	AG	AGK					HK	HKD	HK	HKD	HK	HKD	HK	HKD	LR		LK	TMA	CH	CHY	QN	QNE			CR
423											VC	VCG	DI	DIY	VC	VCG	GL	LVP	VC	VCG	AG	AGV	DI	DIY	GK	GKC					KD	KDY	KD	KDY	KD	KDY	KD	KDY	RS		KL		HY	HYV	NE	NEL			RE
424											CG	CGL	IY	IYI	CG	CGL	LV	VPV	CG	CGL	GV	GVC	IY	IYI	KC	KCG					DY	DYV	DY	DYV	DY	DYV	DY	DYV	ST		LR		YV	YVL	EL	ELL			EF
425											GL	GLV	YI	YIA	GL	GLV	VP	PVM	GL	GLV	VC	VCG	YI	YIA	CG	CGL					YV	YVL	YV	YVL	YV	YVL	YV	YVL	TM		RS		VL	VLA	LL	LLT			FQ
426											LV	LVP	IA	IAG	LV	LVP	PV	VMA	LV	LVP	CG	CGL	IA	IAG	GL	GLV					VL	VLV	VL	VLV	VL	VLV	VL	VLV	MA		ST		LA	LAK	LT	LTD			QK
427											VP	VPV	AG	AGK	VP	VPV	VM	MAE	VP	VPV	GL	GLV	AG	AGK	LV	LVP					LV	LVP	LV	LVP	LV	LVP	LV	LVP			TM		AK	AKN	TD	TDD			KV
428											PV	PVM	GK	GKT	PV	PVM	MA	AER	PV	PVM	LV	LVP	GK	GKT	VP	VPV					VP	VPC	VP	VPC	VP	VPC	VP	VPC			MA		KN	KNT	DD	DDD			VS
429											VM	VMA	KT	KTY	VM	VMA	AE	ERY	VM	VMA	VP	VPV	KT	KTY	PV	PVA					PC	PCK	PC	PCK	PC	PCK	PC	PCK					NT	NTD	DD	DDE			SP
430											MA	MAE	TY	TYG	MA	MAE	ER	RYD	MA	MAE	PV	PVM	TY	TYG	VA	VAA					CK	CKL	CK	CKL	CK	CKL	CK	CKL					TD	TDD	DE	DEL			PI
431											AE	AER	YG	YGL	AE	AER	RY	YDD	AE	AER	VM	VMA	YG	YGL	AA	AAE					KL	KLK	KL	KLK	KL	KLK	KL	KLK					DD	DDT	EL	ELK			IC
432											ER	ERY	GL	GLV	ER	ERY	YD	DDE	ER	ERY	MA	MAE	GL	GLV	AE	AEC					LK	LKL	LK	LKL	LK	LKL	LK	LKL					DT	DTF	LK	LKR			CT
433											RY	RYD	LV	LVP	RY	RYD	DD	DES	RY	RYD	AE	AER	LV	LVP	EC	ECY					KL	KLR	KL	KLR	KL	KLR	KL	KLR					TF	TFV	KR	KRL			TM
434											YD	YDD	VP	VPA	YD	YDD	DE	ESQ	YD	YDD	ER	ERY	VP	VPA	CY	CYG					LR	LRS	LR	LRS	LR	LRS	LR	LRS					FV	FVV	RL	RLP			ME
435											DD	DDE	PA	PAA	DD	DDE	ES	SQC	DD	DDE	RY	RYD	PA	PAA	YG	YGQ					RS	RST	RS	RST	RS	RST	RS	RST					VV	VVI	LP	LPY			EY
436											DE	DES	AA	AAG	DE	DES	SQ	QCS	DE	DES	YD	YDD	AA	AAG	GQ	GQV					ST	STM	ST	STM	ST	STM	ST	STM					VI	VIG	PY	PYK			YV
437											ES	ESQ	AG	AGE	ES	ESQ	QC	CSK	ES	ESQ	DD	DDE	AG	AGE	QV	QVC					TM	TMA	TM	TMA	TM	TMA	TM	TMA					IG	IGE	YK	YKS			VP
438											SQ	SQC	GE	GES	SQ	SQC	CS	SKT	SQ	SQC	DE	DES	GE	GES	VC	VCA					MA		MA		MA		MA						GE	GEI	KS	KSG			PH
439											QC	QCS	ES	ESF	QC	QCS	SK	KTD	QC	QCS	ES	ESQ	ES	ESF	CA	CAP																	EI	EII	SG	SGD			HC
440											CS	CSK	SF	SFS	CS	CSK	KT	TDE	CS	CSK	SQ	SQC	SF	SFS	AP	APA																	II	IIQ	GD	GDI			CG
441											SK	SKT	FS	FSA	SK	SKT	TD	DER	SK	SKT	QC	QCS	FS	FSA	PA	PAD																	IQ	IQC	DI	DIT			GS
442											KT	KTD	SA	SAE	KT	KTD	DE	ERP	KT	KTD	CS	CSK	SA	SAE	AD	ADE																	QC	QCG	IT	ITI			SD
443											TD	TDE	AE	AED	TD	TDE	ER	RPA	TD	TDE	SK	SKT	AE	AED	DE	DEI																	CG	CGT	TI	TIF			DG
444											DE	DER	ED	EDN	DE	DER	RP	PAS	DE	DER	KT	KTD	ED	EDN	EI	EIT																	GT	GTS	IF	IFK			GV
445											ER	ERP	DN	DNN	ER	ERP	PA	ASY	ER	ERP	TD	TDE	DN	DNN	IT	ITE																	TS	TSK	FK	FKQ			VT
446											RP	RPA	NN	NNN	RP	RPA	AS	SYF	RP	RPA	DE	DER	NN	NNN	TE	TEE																	SK	SKT	KQ	KQS			TY
447											PA	PAS	NN	NNA	PA	PAS	SY	YFA	PA	PAS	ER	ERP	NN	NNA	EE	EEM																	KT	KTM	QS	QSS			YS
448											AS	ASY	NA	NAY	AS	ASY	YF	FAV	AS	ASY	RP	RPA	NA	NAY	EM	EMR																	TM	TMT	SS	SSM			SN
449											SY	SYF	AY	AYY	SY	SYF	FA	AVA	SY	SYF	PA	PAS	AY	AYY	MR	MRN																	MT	MTC	SM	SMF			NR
450											YF	YFA	YY	YYA	YF	YFA	AV	VAV	YF	YFA	AS	ASY	YY	YYA	RN	RNL																	TC	TCL	MF	MFI			RC
451											FA	FAV	YA	YAV	FA	FAV	VA	AVA	FA	FAV	SY	SYF	YA	YAV	NL	NLH																	CL	CLK	FI	FIQ			CF
452											AV	AVA	AV	AVA	AV	AVA	AV	VAR	AV	AVA	YF	YFA	AV	AVA	LH	LHL																	LK	LKN	IQ	IQM			FF
453											VA	VAV	VA	VAL	VA	VAV	VA	ARK	VA	VAV	FA	FAV	VA	VAL	HL	HLK																	KN	KNV	QM	QMH			FC
454											AV	AVA	AL	ALV	AV	AVA	AR	RKD	AV	AVA	AV	AVA	AL	ALV	LK	LKH																	NV	NVL	MH	MHT			CN
455											VA	VAR	LV	LVK	VA	VAR	RK	KDS	VA	VAR	VA	VAV	LV	LVK	KH	KHK																	VL	VLV	HT	HTE			NA
456											AR	ARK	VK	VKR	AR	ARK	KD	DSN	AR	ARK	AV	AVA	VK	VKR	HK	HKG																	LV	LVT	TE	TEF			AY
457											RK	RKD	KR	KRN	RK	RKD	DS	SNV	RK	RKD	VA	VAR	KR	KRN	KG	KGL																	VT	VTL	EF	EFG			YV
458											KD	KDS	RN	RNP	KD	KDS	SN	NVN	KD	KDS	AR	ARK	RN	RNP	GL	GLS																	TL	TLG	FG	FGL			VQ
459											DS	DSN	NP	NPS	DS	DSN	NV	VNW	DS	DSN	RK	RKD	NP	NPS	LS	LSP																	LG	LGR	GL	GLE			QS
460											SN	SNV	PS	PSN	SN	SNV	VN	NWN	SN	SNV	KD	KDS	PS	PSN	SP	SPV																	GR	GRT	LE	LEL			SN
461											NV	NVN	SN	SNA	NV	NVN	NW	WNN	NV	NVN	DS	DSN	SN	SNA	PV	PVY																	RT	RTT	EL	ELV			NR
462											VN	VNW	NA	NAF	VN	VNW	WN	NNL	VN	VNW	SN	SNV	NA	NAF	VY	VYA																	TT	TTI	LV	LVV			RT
463											NW	NWN	AF	AFT	NW	NWN	NN	NLK	NW	NWN	NV	NVN	AF	AFT	YA	YAI																	TI	TIK	VV	VVQ			TL
464											WN	WNN	FT	FTI	WN	WNN	NL	LKG	WN	WNN	VN	VNW	FT	FTI	AI	AIA																	IK	IKI	VQ	VQT			LN
465											NN	NNL	TI	TIN	NN	NNL	LK	KGK	NN	NNL	NW	NWN	TI	TIN	IA	IAL																	KI	KIC	QT	QTS			NL
466											NL	NLK	IN	IND	NL	NLK	KG	GKK	NL	NLK	WN	WNN	IN	IND	AL	ALA																	IC	ICS	TS	TSP			LV
467											LK	LKG	ND	NDL	LK	LKG	GK	KKS	LK	LKG	NN	NNL	ND	NDL	LA	LAK																	CS	CSC	SP	SPV			VS
468											KG	KGK	DL	DLK	KG	KGK	KK	KSC	KG	KGK	NL	NLK	DL	DLK	AK	AKK																	SC	SCG	PV	PVF			SM
469											GK	GKK	LK	LKG	GK	GKK	KS	SCH	GK	GKK	LK	LKG	LK	LKG	KK	KKN																	CG	CGS	VF	VFQ			MA
470											KK	KKS	KG	KGK	KK	KKS	SC	CHT	KK	KKS	KG	KGK	KG	KGK	KN	KNA																	GS	GSI	FQ	FQA			AA
471											KS	KSC	GK	GKK	KS	KSC	CH	HTA	KS	KSC	GK	GKK	GK	GKK	NA	NAK																	SI	SIY	QA	QAY			AC
472											SC	SCH	KK	KKS	SC	SCH	HT	TAV	SC	SCH	KK	KKS	KK	KKS	AK	AKQ																	IY	IYM	AY	AYV
473											CH	CHT	KS	KSC	CH	CHT	TA	AVG	CH	CHT	KS	KSC	KS	KSC	KQ	KQI																	YM	YMN	YV	YVK
474											HT	HTA	SC	SCH	HT	HTA	AV	VGR	HT	HTA	SC	SCH	SC	SCH	QI	QIN																	MN	MNN	VK	VKV
475											TA	TAV	CH	CHT	TA	TAV	VG	GRT	TA	TAV	CH	CHT	CH	CHT	IN	INI																	NN	NNF	KV	KVS
476											AV	AVG	HT	HTG	AV	AVG	GR	RTA	AV	AVG	HT	HTA	HT	HTG	NI	NIH																	NF	NFI	VS	VSA
477											VG	VGR	TG	TGL	VG	VGR	RT	TAG	VG	VGR	TA	TAV	TG	TGL	IH	IHN																	FI	FIV	SA	SAQ
478											GR	GRT	GL	GLG	GR	GRT	TA	AGW	GR	GRT	AV	AVG	GL	GLG	HN	HNL																	IV	IVK	AQ	AQF
479											RT	RTA	LG	LGR	RT	RTA	AG	GWV	RT	RTA	VG	VGR	LG	LGR	NL	NLR																	VK	VKL	QF	QFQ
480											TA	TAG	GR	GRT	TA	TAG	GW	WVI	TA	TAG	GR	GRT	GR	GRT	LR	LRG																	KL	KLP	FQ	FQG
481											AG	AGW	RT	RTA	AG	AGW	WV	VIP	AG	AGW	RT	RTA	RT	RTA	RG	RGR																	LP	LPV	QG	QGR
482											GW	GWV	TA	TAG	GW	GWV	VI	IPM	GW	GWV	TA	TAG	TA	TAG	GR	GRR																	PV	PVS	GR	GRT
483											WV	WVI	AG	AGW	WV	WVI	IP	PMG	WV	WVI	AG	AGW	AG	AGW	RR	RRS																	VS	VSK	RT	RTL
484											VI	VIP	GW	GWN	VI	VIP	PM	MGL	VI	VIP	GW	GWV	GW	GWN	RS	RSC																	SK	SKD	TL	TLG
485											IP	IPM	WN	WNI	IP	IPM	MG	GLI	IP	IPM	WV	WVI	WN	WNI	SC	SCH																	KD	KDG	LG	LGL
486											PM	PMG	NI	NIP	PM	PMG	GL	LIH	PM	PMG	VI	VIP	NI	NIP	CH	CHS																	DG	DGI	GL	GLC
487											MG	MGL	IP	IPI	MG	MGL	LI	IHN	MG	MGL	IP	IPM	IP	IPI	HS	HSH																	GI	GIT	LC	LCG
488											GL	GLI	PI	PIG	GL	GLI	IH	HNR	GL	GLI	PM	PMG	PI	PIG	SH	SHL																	IT	ITI	CG	CGN
489											LI	LIH	IG	IGM	LI	LIH	HN	NRT	LI	LIH	MG	MGL	IG	IGM	HL	HLY																	TI	TIF	GN	GNY
490											IH	IHN	GM	GML	IH	IHN	NR	RTG	IH	IHN	GL	GLI	GM	GML	LY	LYS																	IF	IFR	NY	NYN
491											HN	HNR	ML	MLV	HN	HNR	RT	TGT	HN	HNR	LI	LIH	ML	MLV	YS	YSP																	FR	FRP	YN	YNG
492											NR	NRT	LV	LVK	NR	NRT	TG	GTC	NR	NRT	IH	IHN	LV	LVK	SP	SPG																	RP	RPS	NG	NGD
493											RT	RTG	VK	VKK	RT	RTG	GT	TCN	RT	RTG	HN	HNR	VK	VKK	PG	PGG																	PS	PST	GD	GDT
494											TG	TGT	KK	KKG	TG	TGT	TC	CNF	TG	TGT	NR	NRT	KK	KKG	GG	GGW																	ST	STF	DT	DTT
495											GT	GTC	KG	KGF	GT	GTC	CN	EYF	GT	GTC	RT	RTG	KG	KGF	GW	GWL																	TF	TFF	TT	TTD
496											TC	TCN	GF	GFI	TC	TCN	NF	YFS	TC	TCN	TG	TGT	GF	GFI	WL	WLL																	FF	FFI	TD	TDD
497											CN	CNF	FI	FIN	CN	CNF	EY	FSE	CN	CNF	GT	GTC	FI	FIN	LL	LLL																	FI	FIK	DD	DDF
498											NF	NFD	IN	INP	NF	NFD	YF	SEG	NF	NFN	TC	TCN	IN	INP	LL	LLS																	IK	IKI	DF	DFM
499											FD	FDE	NP	NPR	FD	FDE	FS	EGC	FN	FNE	CN	CNF	NP	NPR	LS	LSR																	KI	KIL	FM	FMT
500											DE	DEY	PR	PRD	DE	DEY	SE	GCA	NE	NEY	NF	NFD	PR	PRD	SR	SRY																	IL	ILS	MT	MTS
501											EY	EYF	RD	RDC	EY	EYF	EG	CAP	EY	EYF	FD	FDE	RD	RDC	RY	RYT																	LS	LSS	TS	TSM
502											YF	YFS	DC	DCN	YF	YFS	GC	APG	YF	YFS	DE	DEY	DC	DCN	YT	YTV																	SS	SSA	SM	SMD
503											FS	FSE	CN	CNI	FS	FSE	CA	PGS	FS	FSE	EY	EYF	CN	CNI	TV	TVG																	SA	SAG	MD	MDI
504											SE	SEG	NI	NIP	SE	SEG	AP	GSP	SE	SEG	YF	YFS	NI	NIP	VG	VGA																	AG	AGV	DI	DIT
505											EG	EGC	IP	IPQ	EG	EGC	PG	SPP	EG	EGC	FS	FSE	IP	IPQ	GA	GAL																	GV	GVQ	IT	ITE
506											GC	GCA	PQ	PQA	GC	GCA	GS	PPN	GC	GCA	SE	SEG	PQ	PQA	AL	ALE																	VQ	VQI	TE	TEG
507											CA	CAP	QA	QAV	CA	CAP	SP	PNS	CA	CAP	EG	EGC	QA	QAV	LE	LEN																	QI	QIR	EG	EGT
508											AP	APG	AV	AVS	AP	APG	PP	NSR	AP	APG	GC	GCA	AV	AVS	EN	ENV																	IR	IRV	GT	GTA
509											PG	PGS	VS	VSE	PG	PGS	PN	SRL	PG	PGS	CA	CAP	VS	VSE	NV	NVT																	RV	RVQ	TA	TAS
510											GS	GSP	SE	SEF	GS	GSP	NS	RLC	GS	GSP	AP	APG	SE	SEF	VT	VTE																	VQ	VQM	AS	ASL
511											SP	SPP	EF	EFF	SP	SPP	SR	LCQ	SP	SPP	PG	PGS	EF	EFF	TE	TEN																	QM	QMK	SL	SLF
512											PP	PPN	FF	FFS	PP	PPN	RL	CQL	PP	PPN	GS	GSP	FF	FFS	EN	ENC																	MK	MKP	LF	LFV
513											PN	PNS	FS	FSA	PN	PNS	LC	QLC	PN	PNS	SP	SPP	FS	FSA	NC	NCD																	KP	KPV	FV	FVD
514											NS	NSR	SA	SAS	NS	NSR	CQ	LCQ	NS	NSR	PP	PPN	SA	SAS	CD	CDV																	PV	PVM	VD	VDS
515											SR	SRL	AS	ASC	SR	SRL	QL	CQG	SR	SRL	PN	PNS	AS	ASC	DV	DVG																	VM	VMQ	DS	DSW
516											RL	RLC	SC	SCV	RL	RLC	LC	QGS	RL	RLC	NS	NSR	SC	SCV	VG	VGS																	MQ	MQL	SW	SWR
517											LC	LCQ	CV	CVP	LC	LCQ	CQ	GSG	LC	LCQ	SR	SRL	CV	CVP	GS	GSA																	QL	QLS	WR	WRA
518											CQ	CQL	VP	VPS	CQ	CQL	QG	SGG	CQ	CQL	RL	RLC	VP	VPS	SA	SAY																	LS	LSI	RA	RAG
519											QL	QLC	PS	PSA	QL	QLC	GS	GGI	QL	QLC	LC	LCQ	PS	PSA	AY	AYQ																	SI	SIT	AG	AGN
520											LC	LCQ	SA	SAE	LC	LCQ	SG	GIP	LC	LCQ	CQ	CQL	SA	SAE	YQ	YQN																	IT	ITV	GN	GNC
521											CQ	CQG	AE	AEQ	CQ	CQG	GG	IPP	CQ	CQG	QL	QLC	AE	AEQ	QN	QNY																	TV	TVD	NC	NCL
522											QG	QGS	EQ	EQG	QG	QGS	GI	PPE	QG	QGS	LC	LCQ	EQ	EQG	NY	NYF																	VD	VDH	CL	CLP
523											GS	GSG	QG	QGN	GS	GSG	IP	PEK	GS	GSG	CQ	CQG	QG	QGN	YF	YFW																	DH	DHS	LP	LPA
524											SG	SGG	GN	GNY	SG	SGG	PP	EKC	SG	SGG	QG	QGS	GN	GNY	FW	FWK																	HS	HSY	PA	PAM
525											GG	GGI	NY	NYP	GG	GGI	PE	KCV	GG	GGI	GS	GSG	NY	NYP	WK	WKG																	SY	SYQ	AM	AME
526											GI	GIP	YP	YPS	GI	GIP	EK	CVA	GI	GIP	SG	SGG	YP	YPS	KG	KGC																	YQ	YQN	ME	MER
527											IP	IPP	PS	PST	IP	IPP	KC	VAS	IP	IPP	GG	GGI	PS	PST	GC	GCM																	QN	QNR	ER	ERE
528											PP	PPE	ST	STL	PP	PPE	CV	ASS	PP	PPE	GI	GIP	ST	STL	CM	CMP																	NR	NRT	RE	RET
529											PE	PEK	TL	TLC	PE	PEK	VA	SSH	PE	PEK	IP	IPP	TL	TLC	MP	MPG																	RT	RTS	ET	ETD
530											EK	EKC	LC	LCQ	EK	EKC	AS	SHE	EK	EKC	PP	PPE	LC	LCQ	PG	PGA																	TS	TSG	TD	TDP
531											KC	KCV	CQ	CQL	KC	KCV	SS	HEK	KC	KCV	PE	PER	CQ	CQL	GA	GAD																	SG	SGL	DP	DPC
532											CV	CVA	QL	QLC	CV	CVA	SH	EKY	CV	CVA	ER	ERC	QL	QLC	AD	ADG																	GL	GLC	PC	PCA
533											VA	VAS	LC	LCI	VA	VAS	HE	KYF	VA	VAS	RC	RCV	LC	LCI	DG	DGN																	LC	LCG	CA	CAL
534											AS	ASS	CI	CIG	AS	ASS	EK	YFG	AS	ASS	CV	CVA	CI	CIG	GN	GNL																	CG	CGN	AL	ALS
535											SS	SSH	IG	IGD	SS	SSH	KY	FGY	SS	SSH	VA	VAS	IG	IGD	NL	NLC																	GN	GNF	LS	LSQ
536											SH	SHE	GD	GDN	SH	SHE	YF	GYT	SH	SHE	AS	ASS	GD	GDN	LC	LCK																	NF	NFN	SQ	SQL
537											HE	HEK	DN	DNN	HE	HEK	FG	YTG	HE	HEK	SS	SSH	DN	DNN	CK	CKV																	FN	FNN	QL	QLN
538											EK	EKY	NN	NNG	EK	EKY	GY	TGA	EK	EKY	SH	SHE	NN	NNG	KV	KVC																	NN	NNI	LN	LNK
539											KY	KYF	NG	NGN	KY	KYF	YT	GAL	KY	KYF	HE	HEK	NG	NGN	VC	VCI																	NI	NIQ	NK	NKI
540											YF	YFG	GN	GNN	YF	YFG	TG	ALR	YF	YFG	EK	EKY	GN	GNN	CI	CIG																	IQ	IQT	KI	KIS
541											FG	FGY	NN	NNK	FG	FGY	GA	LRC	FG	FGY	KY	KYF	NN	NNK	IG	IGD																	QT	QTD	IS	ISA
542											GY	GYT	NK	NKC	GY	GYT	AL	RCL	GY	GYT	YF	YFG	NK	NKC	GD	GDS																	TD	TDD	SA	SAE
543											YT	YTG	KC	KCS	YT	YTG	LR	CLV	YT	YTG	FG	FGY	KC	KCS	DS	DSE																	DD	DDF	AE	AET
544											TG	TGA	CS	CSA	TG	TGA	RC	LVE	TG	TGA	GY	GYT	CS	CSA	SE	SEV																	DF	DFR	ET	ETH
545											GA	GAL	SA	SAS	GA	GAL	CL	VEK	GA	GAL	YT	YTG	SA	SAS	EV	EVE																	FR	FRT	TH	THC
546											AL	ALR	AS	ASS	AL	ALR	LV	EKG	AL	ALR	TG	TGA	AS	ASS	VE	VEG																	RT	RTA	HC	HCS
547											LR	LRC	SS	SSQ	LR	LRC	VE	KGD	LR	LRC	GA	GAL	SS	SSQ	EG	EGA																	TA	TAT	CS	CSI
548											RC	RCL	SQ	SQE	RC	RCL	EK	GDV	RC	RCL	AL	ALR	SQ	SQE	GA	GAR																	AT	ATG	SI	SIL
549											CL	CLV	QE	QER	CL	CLV	KG	DVA	CL	CLV	LR	LRC	QE	QER	AR	ARV																	TG	TGA	IL	ILT
550											LV	LVE	ER	ERY	LV	LVE	GD	VAF	LV	LVE	RC	RCL	ER	ERY	RV	RVS																	GA	GAV	LT	LTK
551											VE	VEK	RY	RYY	VE	VEK	DV	AFI	VE	VEK	CL	CLV	RY	RYY	VS	VSS																	AV	AVE	TK	TKK
552											EK	EKG	YY	YYS	EK	EKG	VA	FIQ	EK	EKG	LV	LVE	YY	YYS	SS	SSR																	VE	VED	KK	KKG
553											KG	KGD	YS	YSY	KG	KGD	AF	IQH	KG	KGD	VE	VEK	YS	YSY	SR	SRC																	ED	EDS	KG	KGT
554											GD	GDV	SY	SYN	GD	GDV	FI	QHS	GD	GDV	EK	EKG	SY	SYN	RC	RCA																	DS	DSA	GT	GTV
555											DV	DVA	YN	YNG	DV	DVA	IQ	HST	DV	DVA	KG	KGD	YN	YNG	CA	CAA																	SA	SAA	TV	TVF
556											VA	VAF	NG	NGA	VA	VAF	QH	STV	VA	VAF	GD	GDV	NG	NGA	AA	AAS																	AA	AAA	VF	VFE
557											AF	AFI	GA	GAF	AF	AFI	HS	TVE	AF	AFI	DV	DVA	GA	GAF	AS	ASH																	AA	AAF	FE	FET
558											FI	FIQ	AF	AFR	FI	FIQ	ST	VEE	FI	FIQ	VA	VAF	AF	AFR	SH	SHN																	AF	AFG	ET	ETC
559											IQ	IQH	FR	FRC	IQ	IQH	TV	EEN	IQ	IQH	AF	AFV	FR	FRC	HN	HNE																	FG	FGN	TC	TCH
560											QH	QHS	RC	RCL	QH	QHS	VE	ENT	QH	QHS	FV	FVQ	RC	RCL	NE	NEH																	GN	GNS	CH	CHA
561											HS	HST	CL	CLA	HS	HST	EE	NTG	HS	HST	VQ	VQH	CL	CLA	EH	EHY																	NS	NSW	HA	HAV
562											ST	STV	LA	LAE	ST	STV	EN	TGG	ST	STV	QH	QHS	LA	LAE	HY	HYY																	SW	SWK	AV	AVV
563											TV	TVE	AE	AED	TV	TVE	NT	GGK	TV	TVE	HS	HST	AE	AED	YY	YYG																	WK	WKT	VV	VVN
564											VE	VEE	ED	EDA	VE	VEE	TG	GKN	VE	VEE	ST	STV	ED	EDA	YG	YGN																	KT	KTR	VN	VNP
565											EE	EEN	DA	DAG	EE	EEN	GG	KNK	EE	EEN	TV	TVE	DA	DAG	GN	GNM																	TR	TRA	NP	NPT
566											EN	ENT	AG	AGD	EN	ENT	GK	NKA	EN	ENT	VE	VEE	AG	AGD	NM	NMG																	RA	RAS	PT	PTP
567											NT	NTG	GD	GDV	NT	NTG	KN	KAD	NT	NTG	EE	EEN	GD	GDV	MG	MGA																	AS	ASC	TP	TPF
568											TG	TGG	DV	DVA	TG	TGG	NK	ADW	TG	TGG	EN	ENT	DV	DVA	GA	GAL																	SC	SCF	PF	PFY
569											GG	GGK	VA	VAF	GG	GGK	KA	DWA	GG	GGK	NT	NTG	VA	VAF	AL	ALR																	CF	CFD	FY	FYK
570											GK	GKN	AF	AFV	GK	GKN	AD	WAK	GK	GKN	TG	TGG	AF	AFV	LR	LRC																	FD	FDV	YK	YKR
571											KN	KNK	FV	FVK	KN	KNK	DW	AKN	KN	KNK	GG	GGK	FV	FVK	RC	RCL																	DV	DVE	KR	KRC
572											NK	NKA	VK	VKH	NK	NKA	WA	KNL	NK	NKA	GK	GKN	VK	VKH	CL	CLV																	VE	VED	RC	RCV
573											KA	KAD	KH	KHS	KA	KAD	AK	NLQ	KA	KAD	KN	KNK	KH	KHS	LV	LVG																	ED	EDS	CV	CVY
574											AD	ADW	HS	HST	AD	ADW	KN	LQM	AD	ADW	NK	NKA	HS	HST	VG	VGN																	DS	DSF	VY	VYQ
575											DW	DWA	ST	STV	DW	DWA	NL	QMD	DW	DWA	KA	KAD	ST	STV	GN	GNP																	SF	SFE	YQ	YQA
576											WA	WAK	TV	TVF	WA	WAK	LQ	MDD	WA	WAK	AD	ADW	TV	TVF	NP	NPS																	FE	FED	QA	QAC
577											AK	AKN	VF	VFE	AK	AKN	QM	DDF	AK	AKN	DW	DWA	VF	VFE	PS	PSG																	ED	EDP	AC	ACN
578											KN	KNL	FE	FEN	KN	KNL	MD	DFE	KN	KNL	WA	WAK	FE	FEN	SG	SGR																	DP	DPC	CN	CNY
579											NL	NLQ	EN	ENT	NL	NLQ	DD	FEL	NL	NLQ	AK	AKN	EN	ENT	GR	GRS																	PC	PCS	NY	NYE
580											LQ	LQM	NT	NTD	LQ	LQM	DF	ELL	LQ	LQM	KN	KNL	NT	NTD	RS	RSF																	CS	CSN	YE	YEE
581											QM	QMD	TD	TDG	QM	QMD	FE	LLC	QM	QMD	NL	NLQ	TD	TDG	SF	SFG																	SN	SNS	EE	EET
582											MD	MDD	DG	DGK	MD	MDD	EL	LCT	MD	MDD	LQ	LQM	DG	DGK	FG	FGD																	NS	NSV	ET	ETF
583											DD	DDF	GK	GKN	DD	DDF	LL	CTD	DD	DDF	QM	QMD	GK	GKN	GD	GDV																	SV	SVD	TF	TFP
584											DF	DFE	KN	KNT	DF	DFE	LC	TDG	DF	DFE	MD	MDD	KN	KNT	DV	DVA																	VD	VDK	FP	FPY
585											FE	FEL	NT	NTE	FE	FEL	CT	DGR	FE	FEL	DD	DDF	NT	NTE	VA	VAF																	DK	DKE	PY	PYI
586											EL	ELL	TE	TES	EL	ELL	TD	GRR	EL	ELL	DF	DFE	TE	TES	AF	AFL																	KE	KEK	YI	YIC
587											LL	LLC	ES	ESW	LL	LLC	DG	RRA	LL	LLC	FE	FEL	ES	ESW	FL	FLE																	EK	EKF	IC	ICS
588											LC	LCT	SW	SWA	LC	LCT	GR	RAN	LC	LCT	EL	ELL	SW	SWA	LE	LEH																	KF	KFA	CS	CSA
589											CT	CTD	WA	WAH	CT	CTD	RR	ANV	CT	CTD	LL	LLC	WA	WAR	EH	EHS																	FA	FAQ	SA	SAL
590											TD	TDG	AH	AHD	TD	TDG	RA	NVM	TD	TDG	LC	LCT	AR	ARD	HS	HSN																	AQ	AQH	AL	ALG
591											DG	DGR	HD	HDL	DG	DGR	AN	VMD	DG	DGR	CT	CTD	RD	RDL	SN	SNL																	QH	QHW	LG	LGS
592											GR	GRR	DL	DLK	GR	GRR	NV	MDY	GR	GRR	TD	TDG	DL	DLK	NL	NLL																	HW	HWC	GS	GSY
593											RR	RRA	LK	LKS	RR	RRA	VM	DYR	RR	RRA	DG	DGR	LK	LKS	LL	LLW																	WC	WCA	SY	SYA
594											RA	RAN	KS	KSS	RA	RAN	MD	YRE	RA	RAN	GR	GRR	KS	KSS	LW	LWN																	CA	CAL	YA	YAR
595											AN	ANV	SS	SSG	AN	ANV	DY	REC	AN	ANV	RR	RRA	SS	SSG	WN	WNI																	AL	ALL	AR	ART
596											NV	NVM	SG	SGF	NV	NVM	YR	ECN	NV	NVM	RA	RAN	SG	SGF	NI	NIE																	LL	LLS	RT	RTC
597											VM	VMD	GF	GFQ	VM	VMD	RE	CNL	VM	VMD	AN	ANV	GF	GFQ	IE	IEN																	LS	LSN	TC	TCS
598											MD	MDY	FQ	FQL	MD	MDY	EC	NLA	MD	MDY	NV	NVM	FQ	FQL	EN	ENL																	SN	SNT	CS	CSS
599											DY	DYR	QL	QLL	DY	DYR	CN	LAE	DY	DYR	VM	VMD	QL	QLL	NL	NLE																	NT	NTS	SS	SSM
600											YR	YRE	LL	LLC	YR	YRE	NL	AEV	YR	YRE	MD	MDY	LL	LLC	LE	LES																	TS	TSS	SM	SMG
601											RE	REC	LC	LCR	RE	REC	LA	EVP	RE	REC	DY	DYR	LC	LCR	ES	ESS																	SS	SST	MG	MGL
602											EC	ECN	CR	CRN	EC	ECN	AE	VPT	EC	ECN	YR	YRE	CR	CRN	SS	SSG																	ST	STF	GL	GLI
603											CN	CNL	RN	RNG	CN	CNL	EV	PTH	CN	CNL	RE	REC	RN	RNG	SG	SGW																	TF	TFA	LI	LIL
604											NL	NLA	NG	NGA	NL	NLA	VP	THA	NL	NLA	EC	ECN	NG	NGA	GW	GWA																	FA	FAA	IL	ILE
605											LA	LAE	GA	GAR	LA	LAE	PT	HAV	LA	LAE	CN	CNL	GA	GAR	WA	WAK																	AA	AAC	LE	LEN
606											AE	AEV	AR	ARA	AE	AEV	TH	AVV	AE	AEV	NL	NLA	AR	ARA	AK	AKG																	AC	ACH	EN	ENW
607											EV	EVP	RA	RAE	EV	EVP	HA	VVV	EV	EVP	LA	LAE	RA	RAE	KG	KGY																	CH	CHS	NW	NWR
608											VP	VPT	AE	AEV	VP	VPT	AV	VVR	VP	VPT	AE	AEV	AE	AEV	GY	GYT																	HS	HSV	WR	WRN
609											PT	PTH	EV	EVT	PT	PTH	VV	VRP	PT	PTH	EV	EVP	EV	EVT	YT	YTA																	SV	SVV	RN	RNS
610											TH	THA	VT	VTQ	TH	THA	VV	RPE	TH	THA	VP	VPT	VT	VTQ	TA	TAV																	VV	VVD	NS	NSM
611											HA	HAV	TQ	TQF	HA	HAV	VR	PEK	HA	HAV	PT	PTH	TQ	TQF	AV	AVD																	VD	VDP	SM	SMD
612											AV	AVV	QF	QFA	AV	AVV	RP	EKA	AV	AVV	TH	THA	QF	QFA	VD	VDF																	DP	DPS	MD	MDN
613											VV	VVV	FA	FAQ	VV	VVV	PE	KAN	VV	VVV	HA	HAV	FA	FAQ	DF	DFE																	PS	PSV	DN	DNC
614											VV	VVR	AQ	AQC	VV	VVR	EK	ANK	VV	VVR	AV	AVV	AQ	AQC	FE	FEL																	SV	SVY	NC	NCT
615											VR	VRP	QC	QCH	VR	VRP	KA	NKI	VR	VRP	VV	VVV	QC	QCH	EL	ELL																	VY	VYI	CT	CTI
616											RP	RPE	CH	CHL	RP	RPE	AN	KIR	RP	RPE	VV	VVR	CH	CHL	LL	LLC																	YI	YIK	TI	TIT
617											PE	PEK	HL	HLA	PE	PEK	NK	IRD	PE	PEK	VR	VRP	HL	HLA	LC	LCP																	IK	IKR	IT	ITC
618											EK	EKA	LA	LAR	EK	EKA	KI	RDL	EK	EKA	RP	RPE	LA	LAR	CP	CPD																	KR	KRC	TC	TCT
619											KA	KAN	AR	ARV	KA	KAN	IR	DLL	KA	KAN	PE	PEK	AR	ARV	PD	PDG																	RC	RCM	CT	CTG
620											AN	ANK	RV	RVP	AN	ANK	RD	LLE	AN	ANK	EK	EKA	RV	RVP	DG	DGT																	CM	CMY	TG	TGN
621											NK	NKI	VP	VPA	NK	NKI	DL	LER	NK	NKI	KA	KAN	VP	VPA	GT	GTR																	MY	MYD	GN	GNQ
622											KI	KIR	PA	PAQ	KI	KIR	LL	ERQ	KI	KIR	AN	ANK	PA	PAQ	TR	TRA																	YD	YDT	NQ	NQT
623											IR	IRD	AQ	AQA	IR	IRD	LE	RQE	IR	IRD	NK	NKI	AQ	AQA	RA	RAA																	DT	DTC	QT	QTF
624											RD	RDL	QA	QAI	RD	RDL	ER	QEK	RD	RDL	KI	KIR	QA	QAI	AA	AAV																	TC	TCN	TF	TFS
625											DL	DLL	AI	AIM	DL	DLL	RQ	EKR	DL	DLL	IR	IRD	AI	AIM	AV	AVT																	CN	CNA	FS	FSY
626											LL	LLE	IM	IMV	LL	LLE	QE	KRF	LL	LLE	RD	RDL	IM	IMV	VT	VTE																	NA	NAE	SY	SYN
627											LE	LER	MV	MVH	LE	LER	EK	RFG	LE	LER	DL	DLL	MV	MVH	TE	TEW																	AE	AEK	YN	YNT
628											ER	ERQ	VH	VHP	ER	ERQ	KR	FGV	ER	ERQ	LL	LLE	VH	VHP	EW	EWA																	EK	EKS	NT	NTQ
629											RQ	RQE	HP	HPD	RQ	RQE	RF	GVN	RQ	RQE	LE	LER	HP	HPD	WA	WAG																	KS	KSE	TQ	TQA
630											QE	QEK	PD	PDT	QE	QEK	FG	VNG	QE	QEK	ER	ERQ	PD	PDT	AG	AGC																	SE	SEV	QA	QAC
631											EK	EKR	DT	DTN	EK	EKR	GV	NGS	EK	EKR	RQ	RQE	DT	DTN	GC	GCN																	EV	EVA	AC	ACE
632											KR	KRF	TN	TNI	KR	KRF	VN	GSE	KR	KRF	QE	QEK	TN	TNI	CN	CNL																	VA	VAL	CE	CER
633											RF	RFG	NI	NIF	RF	RFG	NG	SEK	RF	RFG	EK	EKR	NI	NIF	NL	NLG																	AL	ALC	ER	ERT
634											FG	FGV	IF	IFA	FG	FGV	GS	EKS	FG	FGV	KR	KRF	IF	IFA	LG	LGP																	LC	LCS	RT	RTC
635											GV	GVN	FA	FAL	GV	GVN	SE	KSK	GV	GVN	RF	RFG	FA	FAL	GP	GPI																	CS	CSV	TC	TCL
636											VN	VNG	AL	ALY	VN	VNG	EK	SKF	VN	VNG	FG	FGV	AL	ALY	PI	PIP																	SV	SVL	CL	CLS
637											NG	NGS	LY	LYG	NG	NGS	KS	KFM	NG	NGS	GV	GVN	LY	LYG	IP	IPP																	VL	VLS	LS	LSL
638											GS	GSE	YG	YGL	GS	GSE	SK	FMM	GS	GSE	VN	VNG	YG	YGL	PP	PPS																	LS	LST	SL	SLS
639											SE	SEK	GL	GLL	SE	SEK	KF	MMF	SE	SEK	NG	NGS	GL	GLL	PS	PST																	ST	STY	LS	LSN
640											EK	EKS	LL	LLD	EK	EKS	FM	MFE	EK	EKS	GS	GSE	LL	LLD	ST	STV																	TY	TYS	SN	SNP
641											KS	KSK	LD	LDK	KS	KSK	MM	FES	KS	KSK	SE	SEK	LD	LDK	TV	TVM																	YS	YSR	NP	NPT
642											SK	SKF	DK	DKA	SK	SKF	MF	ESQ	SK	SKF	EK	EKS	DK	DKA	VM	VMT																	SR	SRD	PT	PTL
643											KF	KFM	KA	KAQ	KF	KFM	FE	SQN	KF	KFM	KS	KSK	KA	KAQ	MT	MTR																	RD	RDC	TL	TLE
644											FM	FMM	AQ	AQE	FM	FMM	ES	QNK	FM	FMM	SK	SKF	AQ	AQE	TR	TRP																	DC	DCA	LE	LEC
645											MM	MMF	QE	QEY	MM	MMF	SQ	NKD	MM	MMF	KF	KFM	QE	QEY	RP	RPV																	CA	CAA	EC	ECH
646											MF	MFE	EY	EYF	MF	MFE	QN	KDL	MF	MFE	FM	FMM	EY	EYF	PV	PVT																	AA	AAA	CH	CHP
647											FE	FES	YF	YFG	FE	FES	NK	DLL	FE	FES	MM	MMF	YF	YFG	VT	VTV																	AA	AAG	HP	HPT
648											ES	ESQ	FG	FGN	ES	ESQ	KD	LLF	ES	ESQ	MF	MFE	FG	FGN	TV	TVT																	AG	AGM	PT	PTD
649											SQ	SQN	GN	GNN	SQ	SQN	DL	LFK	SQ	SQN	FE	FES	GN	GNN	VT	VTK																	GM	GMT	TD	TDI
650											QN	QNK	NN	NNS	QN	QNK	LL	FKD	QN	QNK	ES	ESQ	NN	NNS	TK	TKI																	MT	MTL	DI	DIP
651											NK	NKD	NS	NSN	NK	NKD	LF	KDL	NK	NKD	SQ	SQN	NS	NSN	KI	KIY																	TL	TLK	IP	IPI
652											KD	KDL	SN	SNR	KD	KDL	FK	DLT	KD	KDL	QN	QNK	SN	SNR	IY	IYD																	LK	LKG	PI	PIE
653											DL	DLL	NR	NRN	DL	DLL	KD	LTK	DL	DLL	NK	NKD	NR	NRN	YD	YDF																	KG	KGW	IE	IEG
654											LL	LLF	RN	RNG	LL	LLF	DL	TKC	LL	LLF	KD	KDL	RN	RNG	DF	DFL																	GW	GWR	EG	EGC
655											LF	LFK	NG	NGF	LF	LFK	LT	KCL	LF	LFK	DL	DLL	NG	NGF	FL	FLM																	WR	WRQ	GC	GCN
656											FK	FKD	GF	GFK	FK	FKD	TK	CLF	FK	FKD	LL	LLF	GF	GFK	LM	LMK																	RQ	RQG	CN	CNC
657											KD	KDL	FK	FKM	KD	KDL	KC	LFK	KD	KDL	LF	LFK	FK	FKM	MK	MKS																	QG	QGI	NC	NCP
658											DL	DLT	KM	KMF	DL	DLT	CL	FKV	DL	DLT	FK	FKD	KM	KMF	KS	KSQ																	GI	GIC	CP	CPK
659											LT	LTK	MF	MFD	LT	LTK	LF	KVR	LT	LTK	KD	KDL	MF	MFD	SQ	SQE																	IC	ICD	PK	PKG
660											TK	TKC	FD	FDS	TK	TKC	FK	VRE	TK	TKC	DL	DLT	FD	FDS	QE	QEF																	CD	CDP	KG	KGM
661											KC	KCL	DS	DSS	KC	KCL	KV	REG	KC	KCL	LT	LTK	DS	DSS	EF	EFL																	DP	DPS	GM	GMY
662											CL	CLF	SS	SSA	CL	CLF	VR	EGT	CL	CLF	TK	TKC	SS	SSA	FL	FLG																	PS	PSE	MY	MYL
663											LF	LFK	SA	SAF	LF	LFK	RE	GTT	LF	LFK	KC	KCL	SA	SAF	LG	LGS																	SE	SEE	YL	YLN
664											FK	FKV	AF	AFQ	FK	FKV	EG	TTY	FK	FKV	CL	CLF	AF	AFQ	GS	GSK																	EE	EEC	LN	LNH
665											KV	KVR	FQ	FQG	KV	KVR	GT	TYK	KV	KVR	LF	LFK	FQ	FQG	SK	SKL																	EC	ECP	NH	NHK
666											VR	VRE	QG	QGK	VR	VRE	TT	YKE	VR	VRE	FK	FKV	QG	QGK	KL	KLD																	CP	CPE	HK	HKN
667											RE	REG	GK	GKD	RE	REG	TY	KEF	RE	REG	KV	KVR	GK	GKD	LD	LDS																	PE	PET	KN	KNE
668											EG	EGT	KD	KDL	EG	EGT	YK	EFL	EG	EGT	VR	VRE	KD	KDL	DS	DSE																	ET	ETM	NE	NEC
669											GT	GTT	DL	DLI	GT	GTT	KE	FLG	GT	GTT	RE	REG	DL	DLI	SE	SEF																	TM	TMV	EC	ECV
670											TT	TTY	LI	LIF	TT	TTY	EF	LGD	TT	TTY	EG	EGT	LI	LIF	EF	EFH																	MV	MVY	CV	CVR
671											TY	TYK	IF	IFK	TY	TYK	FL	GDK	TY	TYK	GT	GTT	IF	IFK	FH	FHL																	VY	VYN	VR	VRK
672											YK	YKE	FK	FKD	YK	YKE	LG	DKF	YK	YKE	TT	TTY	FK	FKD	HL	HLF																	YN	YNY	RK	RKS
673											KE	KEF	KD	KDS	KE	KEF	GD	KFY	KE	KEF	TY	TYK	KD	KDS	LF	LFQ																	NY	NYS	KS	KSH
674											EF	EFL	DS	DSA	EF	EFL	DK	FYT	EF	EFL	YK	YKE	DS	DSA	FQ	FQS																	YS	YSV	SH	SHC
675											FL	FLG	SA	SAV	FL	FLG	KF	YTV	FL	FLG	KE	KEF	SA	SAV	QS	QSQ																	SV	SVK	HC	HCP
676											LG	LGD	AV	AVK	LG	LGD	FY	TVI	LG	LGD	EF	EFL	AV	AVK	SQ	SQK																	VK	VKY	CP	CPC
677											GD	GDK	VK	VKI	GD	GDK	YT	VIS	GD	GDK	FL	FLG	VK	VKI	QK	QKY																	KY	KYC	PC	PCY
678											DK	DKF	KI	KIV	DK	DKF	TV	ISN	DK	DKF	LG	LGD	KI	KIV	KY	KYG																	YC	YCN	CY	CYL
679											KF	KFY	IV	IVP	KF	KFY	VI	SNL	KF	KFY	GD	GDK	IV	IVP	YG	YGE																	CN	CNQ	YL	YLE
680											FY	FYT	VP	VPV	FY	FYT	IS	NLK	FY	FYT	DK	DKF	VP	VPV	GE	GEN																	NQ	NQS	LE	LED
681											YT	YTV	PV	PVE	YT	YTV	SN	LKT	YT	YTV	KF	KFY	PV	PVE	EN	END																	QS	QSC	ED	EDR
682											TV	TVI	VE	VEE	TV	TVI	NL	KTC	TV	TVI	FY	FYT	VE	VEE	ND	NDL																	SC	SCR	DR	DRK
683											VI	VIS	EE	EER	VI	VIS	LK	TCN	VI	VIS	YT	YTV	EE	EER	DL	DLL																	CR	CRS	RK	RKY
684											IS	ISS	ER	ERR	IS	ISN	KT	CNP	IS	ISN	TV	TVI	ER	ERR	LL	LLF																	RS	RSL	KY	KYI
685											SS	SSL	RR	RRT	SN	SNL	TC	NPS	SN	SNL	VI	VIS	RR	RRT	LF	LFK																	SL	SLD	YI	YIL
686											SL	SLK	RT	RTY	NL	NLK	CN	PSD	NL	NLK	IS	ISS	RT	RTY	FK	FKD																	LD	LDE	IL	ILP
687											LK	LKT	TY	TYA	LK	LKT	NP	SDI	LK	LKT	SS	SSL	TY	TYA	KD	KDA																	DE	DEP	LP	LPD
688											KT	KTC	YA	YAE	KT	KTC	PS	DIL	KT	KTC	SL	SLK	YA	YAE	DA	DAT																	EP	EPD	PD	PDQ
689											TC	TCN	AE	AEW	TC	TCN	SD	ILQ	TC	TCN	LK	LKT	AE	AEW	AT	ATQ																	PD	PDP	DQ	DQS
690											CN	CNP	EW	EWL	CN	CNP	DI	LQM	CN	CNP	KT	KTC	EW	EWL	TQ	TQY																	DP	DPL	QS	QST
691											NP	NPS	WL	WLG	NP	NPS	IL	QMC	NP	NPS	TC	TCN	WL	WLG	QY	QYL																	PL	PLC	ST	STM
692											PS	PSD	LG	LGS	PS	PSD	LQ	MCS	PS	PSD	CN	CNP	LG	LGS	YL	YLV																	LC	LCK	TM	TMT
693											SD	SDI	GS	GSE	SD	SDI	QM	CSF	SD	SDI	NP	NPS	GS	GSE	LV	LVP																	CK	CKV	MT	MTG
694											DI	DIL	SE	SEY	DI	DIL	MC	SFL	DI	DIL	PS	PSD	SE	SEY	VP	VPA																	KV	KVQ	TG	TGG
695											IL	ILQ	EY	EYV	IL	ILQ	CS	FLE	IL	ILQ	SD	SDI	EY	EYV	PA	PAT																	VQ	VQI	GG	GGI
696											LQ	LQM	YV	YVE	LQ	LQM	SF	LEG	LQ	LQM	DI	DIL	YV	YVE	AT	ATH																	QI	QIA	GI	GIT
697											QM	QMC	VE	VES	QM	QMC	FL	EGK	QM	QMC	IL	ILQ	VE	VES	TH	THM																	IA	IAP	IT	ITC
698											MC	MCS	ES	ESL	MC	MCS	LE		MC	MCS	LQ	LQM	ES	ESL	HM	HMS																	AP	APM	TC	TCY
699											CS	CSF	SL	SLE	CS	CSF	EG		CS	CSF	QM	QMC	SL	SLE	MS	MSY																	PM	PME	CY	CYC
700											SF	SFL	LE	LEG	SF	SFL	GK		SF	SFL	MC	MCS	LE	LEG	SY	SYQ																	ME	MEG	YC	YCV
701											FL	FLE	EG	EGM	FL	FLE			FL	FLE	CS	CSF	EG	EGM	YQ	YQE																	EG	EGC	CV	CVN
702											LE	LEG	GM	GMQ	LE	LEG			LE	LEG	SF	SFL	GM	GMQ	QE	QEI																	GC	GCG	VN	VNG
703											EG	EGK	MQ	MQT	EG	EGK			EG	EGK	FL	FLE	MQ	MQT	EI	EIL																	CG	CGC	NG	NGR
704											GK		QT	QTP	GK				GK		LE	LEG	QT	QTP	IL	ILG																	GC	GCP	GR	GRL
705													TP	TPQ							EG	EGK	TP	TPQ	LG	LGE																	CP	CPE	RL	RLS
706													PQ	PQC							GK		PQ	PQC	GE	GEP																	PE	PEG	LS	LSC
707													QC	QCS									QC	QCS	EP	EPF																	EG	EGT	SC	SCT
708													CS	CSG									CS	CSG	PF	PFF																	GT	GTY	CT	CTG
709													SG	SGA									SG	SGA	FF	FFQ																	TY	TYL	TG	TGK
710													GA	GAG									GA	GAG	FQ	FQL																	YL	YLN	GK	GKL
711													AG	AGN									AG	AGN	QL	QLA																	LN	LND	KL	KLQ
712													GN	GNK									GN	GNK	LA	LAE																	ND	NDE	LQ	LQN
713													NK	NKL									NK	NKL	AE	AES																	DE	DEE	QN	QNP
714													KL	KLV									KL	KLI	ES	ESV																	EE	EEE	NP	NPA
715													LV	LVQ									LI	LIQ	SV	SVF																	EE	EEC	PA	PAE
716													VQ	VQQ									IQ	IQQ	VF	VFN																	EC	ECV	AE	AES
717													QQ	QQH									QQ	QQH	FN	FNC																	CV	CVT	ES	ESC
718													QH	QHL									QH	QHL	NC	NCT																	VT	VTP	SC	SCK
719													HL	HLL									HL	HLL	CT	CTP																	TP	TPD	CK	CKA
720													LL	LLV									LL	LLV	TP	TPA																	PD	PDD	KA	KAP
721													LV	LVI									LV	LVI	PA	PAG																	DD	DDC	AP	APK
722													VI	VIT									VI	VIT	AG	AGK																	DC	DCP	PK	PKK
723													IT	ITF									IT	ITF	GK	GKV																	CP	CPC	KK	KKY
724													TF	TFV									TF	TFV	KV	KVK																	PC	PCY	KY	KYI
725													FV	FVP									FV	FVP	VK	VKF																	CY	CYY	YI	YIS
726													VP	VPF									VP	VPF	KF	KFF																	YY	YYK	IS	ISC
727													PF	PFI									PF	PFI	FF	FFI																	YK	YKG	SC	SCS
728													FI	FII									FI	FII	FI	FIL																	KG	KGK	CS	CSD
729													II	IIL									II	IIL	IL	ILS																	GK	GKI	SD	SDS
730													IL	ILG									IL	ILG	LS																		KI	KIV	DS	DSL
731													LG	LGQ									LG	LGQ																			IV	IVQ	SL	SLE
732													GQ	GQL									GQ	GQL																			VQ	VQP	LE	LEN
733													QL	QLQ									QL	QLQ																			QP	QPG	EN	ENK
734													LQ	LQG									LQ	LQG																			PG	PGN	NK	NKY
735													QG	QGL									QG	QGL																			GN	GNS	KY	KYG
736													GL	GLG									GL	GLG																			NS	NSF	YG	YGA
737													LG										LG																				SF	SFQ	GA	GAT
738																																											FQ	FQE	AT	ATC
739																																											QE	QED	TC	TCA
740																																											ED	EDK	CA	CAP
741																																											DK	DKL	AP	APT
742																																											KL	KLL	PT	PTC
743																																											LL	LLC	TC	TCQ
744																																											LC	LCK	CQ	CQM
745																																											CK	CKC	QM	QML
746																																											KC	KCI	ML	MLA
747																																											CI	CIQ	LA	LAT
748																																											IQ	IQG	AT	ATG
749																																											QG	QGR	TG	TGI
750																																											GR	GRL	GI	GIE
751																																											RL	RLD	IE	IEC
752																																											LD	LDC	EC	ECI
753																																											DC	DCI	CI	CIP
754																																											CI	CIG	IP	IPT
755																																											IG	IGE	PT	PTK
756																																											GE	GET	TK	TKC
757																																											ET	ETV	KC	KCE
758																																											TV	TVL	CE	CES
759																																											VL	VLV	ES	ESG
760																																											LV	LVK	SG	SGC
761																																											VK	VKD	GC	GCV
762																																											KD	KDC	CV	CVC
763																																											DC	DCP	VC	VCA
764																																											CP	CPA	CA	CAD
765																																											PA	PAP	AD	ADG
766																																											AP	APM	DG	DGL
767																																											PM	PMY	GL	GLY
768																																											MY	MYY	LY	LYE
769																																											YY	YYF	YE	YEN
770																																											YF	YFN	EN	ENL
771																																											FN	FNC	NL	NLD
772																																											NC	NCS	LD	LDG
773																																											CS	CSS	DG	DGR
774																																											SS	SSA	GR	GRC
775																																											SA	SAG	RC	RCV
776																																											AG	AGP	CV	CVP
777																																											GP	GPG	VP	VPP
778																																											PG	PGA	PP	PPE
779																																											GA	GAI	PE	PEE
780																																											AI	AIG	EE	EEC
781																																											IG	IGS	EC	ECP
782																																											GS	GSE	CP	CPC
783																																											SE	SEC	PC	PCE
784																																											EC	ECQ	CE	CEY
785																																											CQ	CQK	EY	EYG
786																																											QK	QKS	YG	YGG
787																																											KS	KSC	GG	GGL
788																																											SC	SCK	GL	GLS
789																																											CK	CKT	LS	LSY
790																																											KT	KTQ	SY	SYG
791																																											TQ	TQD	YG	YGK
792																																											QD	QDM	GK	GKG
793																																											DM	DMH	KG	KGE
794																																											MH	MHC	GE	GEQ
795																																											HC	HCY	EQ	EQI
796																																											CY	CYV	QI	QIQ
797																																											YV	YVT	IQ	IQT
798																																											VT	VTE	QT	QTE
799																																											TE	TEC	TE	TEC
800																																											EC	ECV	EC	ECE
801																																											CV	CVS	CE	CEI
802																																											VS	VSG	EI	EIC
803																																											SG	SGC	IC	ICT
804																																											GC	GCM	CT	CTC
805																																											CM	CMC	TC	TCR
806																																											MC	MCP	CR	CRK
807																																											CP	CPD	RK	RKG
808																																											PD	PDG	KG	KGK
809																																											DG	DGL	GK	GKW
810																																											GL	GLV	KW	KWK
811																																											LV	LVL	WK	WKC
812																																											VL	VLD	KC	KCV
813																																											LD	LDG	CV	CVQ
814																																											DG	DGS	VQ	VQK
815																																											GS	GSG	QK	QKS
816																																											SG	SGG	KS	KSR
817																																											GG	GGC	SR	SRC
818																																											GC	GCI	RC	RCS
819																																											CI	CIP	CS	CSS
820																																											IP	IPK	SS	SST
821																																											PK	PKD	ST	STC
822																																											KD	KDQ	TC	TCN
823																																											DQ	DQC	CN	CNL
824																																											QC	QCP	NL	NLY
825																																											CP	CPC	LY	LYG
826																																											PC	PCV	YG	YGE
827																																											CV	CVH	GE	GEG
828																																											VH	VHG	EG	EGH
829																																											HG	HGG	GH	GHI
830																																											GG	GGH	HI	HIT
831																																											GH	GHF	IT	ITT
832																																											HF	HFY	TT	TTF
833																																											FY	FYK	TF	TFD
834																																											YK	YKP	FD	FDG
835																																											KP	KPG	DG	DGQ
836																																											PG	PGE	GQ	GQR
837																																											GE	GET	QR	QRF
838																																											ET	ETI	RF	RFV
839																																											TI	TIR	FV	FVF
840																																											IR	IRV	VF	VFD
841																																											RV	RVD	FD	FDG
842																																											VD	VDC	DG	DGN
843																																											DC	DCN	GN	GNC
844																																											CN	CNT	NC	NCE
845																																											NT	NTC	CE	CEY
846																																											TC	TCT	EY	EYI
847																																											CT	CTC	YI	YIL
848																																											TC	TCN	IL	ILA
849																																											CN	CNK	LA	LAM
850																																											NK	NKR	AM	AMD
851																																											KR	KRQ	MD	MDG
852																																											RQ	RQW	DG	DGC
853																																											QW	QWN	GC	GCN
854																																											WN	WNC	CN	CNV
855																																											NC	NCT	NV	NVN
856																																											CT	CTD	VN	VNR
857																																											TD	TDN	NR	NRP
858																																											DN	DNP	RP	RPL
859																																											NP	NPC	PL	PLS
860																																											PC	PCK	LS	LSS
861																																											CK	CKG	SS	SSF
862																																											KG	KGT	SF	SFK
863																																											GT	GTC	FK	FKI
864																																											TC	TCT	KI	KIV
865																																											CT	CTV	IV	IVT
866																																											TV	TVY	VT	VTE
867																																											VY	VYG	TE	TEN
868																																											YG	YGN	EN	ENV
869																																											GN	GNG	NV	NVI
870																																											NG	NGH	VI	VIC
871																																											GH	GHY	IC	ICG
872																																											HY	HYM	CG	CGK
873																																											YM	YMS	GK	GKS
874																																											MS	MSF	KS	KSG
875																																											SF	SFD	SG	SGV
876																																											FD	FDG	GV	GVT
877																																											DG	DGE	VT	VTC
878																																											GE	GEK	TC	TCS
879																																											EK	EKF	CS	CSR
880																																											KF	KFD	SR	SRS
881																																											FD	FDF	RS	RSI
882																																											DF	DFL	SI	SIS
883																																											FL	FLG	IS	ISI
884																																											LG	LGD	SI	SIY
885																																											GD	GDC	IY	IYL
886																																											DC	DCD	YL	YLG
887																																											CD	CDY	LG	LGN
888																																											DY	DYI	GN	GNL
889																																											YI	YIL	NL	NLT
890																																											IL	ILA	LT	LTI
891																																											LA	LAQ	TI	TII
892																																											AQ	AQD	II	IIL
893																																											QD	QDF	IL	ILR
894																																											DF	DFC	LR	LRD
895																																											FC	FCP	RD	RDE
896																																											CP	CPN	DE	DET
897																																											PN	PNN	ET	ETY
898																																											NN	NNM	TY	TYS
899																																											NM	NMD	YS	YSI
900																																											MD	MDA	SI	SIS
901																																											DA	DAG	IS	ISG
902																																											AG	AGT	SG	SGK
903																																											GT	GTF	GK	GKN
904																																											TF	TFR	KN	KNL
905																																											FR	FRI	NL	NLQ
906																																											RI	RIV	LQ	LQV
907																																											IV	IVI	QV	QVK
908																																											VI	VIQ	VK	VKY
909																																											IQ	IQN	KY	KYN
910																																											QN	QNN	YN	YNV
911																																											NN	NNA	NV	NVK
912																																											NA	NAC	VK	VKK
913																																											AC	ACG	KK	KKN
914																																											CG	CGK	KN	KNA
915																																											GK	GKS	NA	NAL
916																																											KS	KSL	AL	ALH
917																																											SL	SLS	LH	LHL
918																																											LS	LSI	HL	HLM
919																																											SI	SIC	LM	LMF
920																																											IC	ICS	MF	MFD
921																																											CS	CSL	FD	FDI
922																																											SL	SLK	DI	DII
923																																											LK	LKI	II	III
924																																											KI	KIT	II	IIP
925																																											IT	ITL	IP	IPG
926																																											TL	TLI	PG	PGK
927																																											LI	LIF	GK	GKY
928																																											IF	IFE	KY	KYN
929																																											FE	FES	YN	YNM
930																																											ES	ESS	NM	NMT
931																																											SS	SSE	MT	MTL
932																																											SE	SEI	TL	TLI
933																																											EI	EIR	LI	LIW
934																																											IR	IRL	IW	IWN
935																																											RL	RLL	WN	WNK
936																																											LL	LLE	NK	NKH
937																																											LE	LEG	KH	KHM
938																																											EG	EGR	HM	HMN
939																																											GR	GRI	MN	MNF
940																																											RI	RIQ	NF	NFF
941																																											IQ	IQE	FF	FFI
942																																											QE	QEI	FI	FIK
943																																											EI	EIA	IK	IKI
944																																											IA	IAT	KI	KIS
945																																											AT	ATD	IS	ISR
946																																											TD	TDP	SR	SRE
947																																											DP	DPG	RE	RET
948																																											PG	PGA	ET	ETQ
949																																											GA	GAE	TQ	TQE
950																																											AE	AEK	QE	QET
951																																											EK	EKN	ET	ETI
952																																											KN	KNY	TI	TIC
953																																											NY	NYK	IC	ICG
954																																											YK	YKV	CG	CGL
955																																											KV	KVD	GL	GLC
956																																											VD	VDL	LC	LCG
957																																											DL	DLR	CG	CGN
958																																											LR	LRG	GN	GNY
959																																											RG	RGG	NY	NYN
960																																											GG	GGY	YN	YNG
961																																											GY	GYI	NG	NGN
962																																											YI	YIV	GN	GNM
963																																											IV	IVI	NM	NMK
964																																											VI	VIE	MK	MKD
965																																											IE	IET	KD	KDD
966																																											ET	ETT	DD	DDF
967																																											TT	TTQ	DF	DFE
968																																											TQ	TQG	FE	FET
969																																											QG	QGM	ET	ETR
970																																											GM	GMS	TR	TRS
971																																											MS	MSF	RS	RSK
972																																											SF	SFM	SK	SKY
973																																											FM	FMW	KY	KYV
974																																											MW	MWD	YV	YVA
975																																											WD	WDQ	VA	VAS
976																																											DQ	DQK	AS	ASN
977																																											QK	QKT	SN	SNE
978																																											KT	KTT	NE	NEL
979																																											TT	TTV	EL	ELE
980																																											TV	TVV	LE	LEF
981																																											VV	VVV	EF	EFV
982																																											VV	VVH	FV	FVN
983																																											VH	VHV	VN	VNS
984																																											HV	HVT	NS	NSW
985																																											VT	VTP	SW	SWK
986																																											TP	TPS	WK	WKE
987																																											PS	PSF	KE	KEN
988																																											SF	SFQ	EN	ENP
989																																											FQ	FQG	NP	NPL
990																																											QG	QGK	PL	PLC
991																																											GK	GKV	LC	LCG
992																																											KV	KVC	CG	CGD
993																																											VC	VCG	GD	GDV
994																																											CG	CGL	DV	DVY
995																																											GL	GLC	VY	VYF
996																																											LC	LCG	YF	YFV
997																																											CG	CGD	FV	FVV
998																																											GD	GDF	VV	VVD
999																																											DF	DFD	VD	VDP
1000																																											FD	FDG	DP	DPC
1001																																											DG	DGR	PC	PCS
1002																																											GR	GRS	CS	CSK
1003																																											RS	RSR	SK	SKN
1004																																											SR	SRN	KN	KNP
1005																																											RN	RND	NP	NPY
1006																																											ND	NDF	PY	PYR
1007																																											DF	DFT	YR	YRK
1008																																											FT	FTT	RK	RKA
1009																																											TT	TTR	KA	KAW
1010																																											TR	TRG	AW	AWA
1011																																											RG	RGQ	WA	WAE
1012																																											GQ	GQS	AE	AEK
1013																																											QS	QSV	EK	EKT
1014																																											SV	SVE	KT	KTC
1015																																											VE	VEM	TC	TCS
1016																																											EM	EMS	CS	CSI
1017																																											MS	MSI	SI	SII
1018																																											SI	SIQ	II	IIN
1019																																											IQ	IQE	IN	INS
1020																																											QE	QEF	NS	NSQ
1021																																											EF	EFG	SQ	SQV
1022																																											FG	FGN	QV	QVF
1023																																											GN	GNS	VF	VFS
1024																																											NS	NSW	FS	FSA
1025																																											SW	SWK	SA	SAC
1026																																											WK	WKI	AC	ACH
1027																																											KI	KIT	CH	CHN
1028																																											IT	ITS	HN	HNK
1029																																											TS	TST	NK	NKV
1030																																											ST	STC	KV	KVN
1031																																											TC	TCS	VN	VNR
1032																																											CS	CSN	NR	NRM
1033																																											SN	SNI	RM	RMP
1034																																											NI	NIN	MP	MPY
1035																																											IN	INM	PY	PYY
1036																																											NM	NMT	YY	YYE
1037																																											MT	MTD	YE	YEA
1038																																											TD	TDL	EA	EAC
1039																																											DL	DLC	AC	ACV
1040																																											LC	LCA	CV	CVR
1041																																											CA	CAD	VR	VRD
1042																																											AD	ADQ	RD	RDS
1043																																											DQ	DQP	DS	DSC
1044																																											QP	QPF	SC	SCG
1045																																											PF	PFK	CG	CGC
1046																																											FK	FKS	GC	GCD
1047																																											KS	KSA	CD	CDI
1048																																											SA	SAL	DI	DIG
1049																																											AL	ALG	IG	IGG
1050																																											LG	LGQ	GG	GGD
1051																																											GQ	GQK	GD	GDC
1052																																											QK	QKH	DC	DCE
1053																																											KH	KHC	CE	CEC
1054																																											HC	HCS	EC	ECM
1055																																											CS	CSI	CM	CMC
1056																																											SI	SII	MC	MCD
1057																																											II	IIK	CD	CDA
1058																																											IK	IKS	DA	DAI
1059																																											KS	KSS	AI	AIA
1060																																											SS	SSV	IA	IAV
1061																																											SV	SVF	AV	AVY
1062																																											VF	VFE	VY	VYA
1063																																											FE	FEA	YA	YAM
1064																																											EA	EAC	AM	AMA
1065																																											AC	ACH	MA	MAC
1066																																											CH	CHS	AC	ACL
1067																																											HS	HSK	CL	CLD
1068																																											SK	SKV	LD	LDK
1069																																											KV	KVN	DK	DKG
1070																																											VN	VNP	KG	KGI
1071																																											NP	NPI	GI	GIC
1072																																											PI	PIP	IC	ICI
1073																																											IP	IPY	CI	CID
1074																																											PY	PYY	ID	IDW
1075																																											YY	YYE	DW	DWR
1076																																											YE	YES	WR	WRT
1077																																											ES	ESC	RT	RTP
1078																																											SC	SCV	TP	TPE
1079																																											CV	CVS	PE	PEF
1080																																											VS	VSD	EF	EFC
1081																																											SD	SDF	FC	FCP
1082																																											DF	DFC	CP	CPV
1083																																											FC	FCG	PV	PVY
1084																																											CG	CGC	VY	VYC
1085																																											GC	GCD	YC	YCE
1086																																											CD	CDS	CE	CEY
1087																																											DS	DSV	EY	EYY
1088																																											SV	SVG	YY	YYN
1089																																											VG	VGD	YN	YNS
1090																																											GD	GDC	NS	NSH
1091																																											DC	DCE	SH	SHR
1092																																											CE	CEC	HR	HRK
1093																																											EC	ECF	RK	RKT
1094																																											CF	CFC	KT	KTG
1095																																											FC	FCT	TG	TGS
1096																																											CT	CTS	GS	GSG
1097																																											TS	TSV	SG	SGG
1098																																											SV	SVA	GG	GGA
1099																																											VA	VAA	GA	GAY
1100																																											AA	AAY	AY	AYS
1101																																											AY	AYA	YS	YSY
1102																																											YA	YAR	SY	SYG
1103																																											AR	ARS	YG	YGS
1104																																											RS	RSC	GS	GSS
1105																																											SC	SCS	SS	SSV
1106																																											CS	CST	SV	SVN
1107																																											ST	STA	VN	VNC
1108																																											TA	TAG	NC	NCT
1109																																											AG	AGV	CT	CTW
1110																																											GV	GVC	TW	TWH
1111																																											VC	VCI	WH	WHY
1112																																											CI	CIN	HY	HYR
1113																																											IN	INW	YR	YRP
1114																																											NW	NWR	RP	RPC
1115																																											WR	WRT	PC	PCN
1116																																											RT	RTP	CN	CNC
1117																																											TP	TPA	NC	NCP
1118																																											PA	PAI	CP	CPN
1119																																											AI	AIC	PN	PNQ
1120																																											IC	ICP	NQ	NQY
1121																																											CP	CPV	QY	QYY
1122																																											PV	PVF	YY	YYK
1123																																											VF	VFC	YK	YKY
1124																																											FC	FCD	KY	KYV
1125																																											CD	CDY	YV	YVN
1126																																											DY	DYY	VN	VNI
1127																																											YY	YYN	NI	NIE
1128																																											YN	YNP	IE	IEG
1129																																											NP	NPP	EG	EGC
1130																																											PP	PPD	GC	GCY
1131																																											PD	PDK	CY	CYN
1132																																											DK	DKH	YN	YNC
1133																																											KH	KHE	NC	NCS
1134																																											HE	HEW	CS	CSH
1135																																											EW	EWF	SH	SHD
1136																																											WF	WFY	HD	HDE
1137																																											FY	FYK	DE	DEY
1138																																											YK	YKP	EY	EYF
1139																																											KP	KPC	YF	YFD
1140																																											PC	PCG	FD	FDY
1141																																											CG	CGA	DY	DYE
1142																																											GA	GAP	YE	YEK
1143																																											AP	APC	EK	EKE
1144																																											PC	PCL	KE	KEK
1145																																											CL	CLK	EK	EKC
1146																																											LK	LKT	KC	KCM
1147																																											KT	KTC	CM	CMP
1148																																											TC	TCR	MP	MPC
1149																																											CR	CRN	PC	PCA
1150																																											RN	RNP	CA	CAM
1151																																											NP	NPQ	AM	AMQ
1152																																											PQ	PQG	MQ	MQP
1153																																											QG	QGK	QP	QPT
1154																																											GK	GKC	PT	PTS
1155																																											KC	KCG	TS	TSV
1156																																											CG	CGN	SV	SVT
1157																																											GN	GNI	VT	VTL
1158																																											NI	NIL	TL	TLP
1159																																											IL	ILY	LP	LPT
1160																																											LY	LYS	PT	PTA
1161																																											YS	YSL	TA	TAT
1162																																											SL	SLE	AT	ATQ
1163																																											LE	LEG	TQ	TQP
1164																																											EG	EGC	QP	QPT
1165																																											GC	GCY	PT	PTS
1166																																											CY	CYP	TS	TSP
1167																																											YP	YPE	SP	SPS
1168																																											PE	PEC	PS	PST
1169																																											EC	ECS	ST	STS
1170																																											CS	CSP	TS	TSS
1171																																											SP	SPD	SS	SSA
1172																																											PD	PDK	SA	SAS
1173																																											DK	DKP	AS	AST
1174																																											KP	KPY	ST	STV
1175																																											PY	PYF	TV	TVL
1176																																											YF	YFD	VL	VLT
1177																																											FD	FDE	LT	LTE
1178																																											DE	DEE	TE	TET
1179																																											EE	EER	ET	ETT
1180																																											ER	ERR	TT	TTN
1181																																											RR	RRE	TN	TNP
1182																																											RE	REC	NP	NPP
1183																																											EC	ECV	PP	PPV
1184																																											CV	CVS	PV
1185																																											VS	VSL
1186																																											SL	SLP
1187																																											LP	LPD
1188																																											PD	PDC
1189																																											DC	DCT
1190																																											CT	CTS
1191																																											TS	TSC
1192																																											SC	SCN
1193																																											CN	CNP
1194																																											NP	NPE
1195																																											PE	PEE
1196																																											EE	EEK
1197																																											EK	EKL
1198																																											KL	KLC
1199																																											LC	LCT
1200																																											CT	CTE
1201																																											TE	TED
1202																																											ED	EDS
1203																																											DS	DSK
1204																																											SK	SKD
1205																																											KD	KDC
1206																																											DC	DCL
1207																																											CL	CLC
1208																																											LC	LCC
1209																																											CC	CCY
1210																																											CY	CYN
1211																																											YN	YNG
1212																																											NG	NGK
1213																																											GK	GKT
1214																																											KT	KTY
1215																																											TY	TYP
1216																																											YP	YPL
1217																																											PL	PLN
1218																																											LN	LNE
1219																																											NE	NET
1220																																											ET	ETI
1221																																											TI	TIY
1222																																											IY	IYS
1223																																											YS	YSQ
1224																																											SQ	SQT
1225																																											QT	QTE
1226																																											TE	TEG
1227																																											EG	EGT
1228																																											GT	GTK
1229																																											TK	TKC
1230																																											KC	KCG
1231																																											CG	CGN
1232																																											GN	GNA
1233																																											NA	NAF
1234																																											AF	AFC
1235																																											FC	FCG
1236																																											CG	CGP
1237																																											GP	GPN
1238																																											PN	PNG
1239																																											NG	NGM
1240																																											GM	GMI
1241																																											MI	MII
1242																																											II	IIE
1243																																											IE	IET
1244																																											ET	ETF
1245																																											TF	TFI
1246																																											FI	FIP
1247																																											IP	IPC
1248																																											PC	PCS
1249																																											CS	CST
1250																																											ST	STL
1251																																											TL	TLS
1252																																											LS	LSV
1253																																											SV	SVP
1254																																											VP	VPA
1255																																											PA	PAQ
1256																																											AQ	AQE
1257																																											QE	QEQ
1258																																											EQ	EQL
1259																																											QL	QLM
1260																																											LM	LMQ
1261																																											MQ	MQP
1262																																											QP	QPV
1263																																											PV	PVT
1264																																											VT	VTS
1265																																											TS	TSA
1266																																											SA	SAP
1267																																											AP	APL
1268																																											PL	PLL
1269																																											LL	LLS
1270																																											LS	LST
1271																																											ST	STE
1272																																											TE	TEA
1273																																											EA	EAT
1274																																											AT	ATP
1275																																											TP	TPC
1276																																											PC	PCF
1277																																											CF	CFC
1278																																											FC	FCT
1279																																											CT	CTD
1280																																											TD	TDN
1281																																											DN	DNG
1282																																											NG	NGQ
1283																																											GQ	GQL
1284																																											QL	QLI
1285																																											LI	LIQ
1286																																											IQ	IQM
1287																																											QM	QMG
1288																																											MG	MGE
1289																																											GE	GEN
1290																																											EN	ENV
1291																																											NV	NVS
1292																																											VS	VSL
1293																																											SL	SLP
1294																																											LP	LPM
1295																																											PM	PMN
1296																																											MN	MNI
1297																																											NI	NIS
1298																																											IS	ISG
1299																																											SG	SGH
1300																																											GH	GHC
1301																																											HC	HCA
1302																																											CA	CAY
1303																																											AY	AYS
1304																																											YS	YSI
1305																																											SI	SIC
1306																																											IC	ICN
1307																																											CN	CNA
1308																																											NA	NAS
1309																																											AS	ASC
1310																																											SC	SCQ
1311																																											CQ	CQI
1312																																											QI	QIE
1313																																											IE	IEL
1314																																											EL	ELI
1315																																											LI	LIW
1316																																											IW	IWA
1317																																											WA	WAE
1318																																											AE	AEC
1319																																											EC	ECK
1320																																											CK	CKV
1321																																											KV	KVV
1322																																											VV	VVQ
1323																																											VQ	VQT
1324																																											QT	QTE
1325																																											TE	TEA
1326																																											EA	EAL
1327																																											AL	ALE
1328																																											LE	LET
1329																																											ET	ETC
1330																																											TC	TCE
1331																																											CE	CEP
1332																																											EP	EPN
1333																																											PN	PNS
1334																																											NS	NSE
1335																																											SE	SEA
1336																																											EA	EAC
1337																																											AC	ACP
1338																																											CP	CPP
1339																																											PP	PPT
1340																																											PT	PTA
1341																																											TA	TAA
1342																																											AA	AAP
1343																																											AP	APN
1344																																											PN	PNA
1345																																											NA	NAT
1346																																											AT	ATS
1347																																											TS	TSL
1348																																											SL	SLV
1349																																											LV	LVP
1350																																											VP	VPA
1351																																											PA	PAT
1352																																											AT	ATA
1353																																											TA	TAL
1354																																											AL	ALA
1355																																											LA	LAP
1356																																											AP	APM
1357																																											PM	PMS
1358																																											MS	MSD
1359																																											SD	SDC
1360																																											DC	DCL
1361																																											CL	CLG
1362																																											LG	LGL
1363																																											GL	GLI
1364																																											LI	LIP
1365																																											IP	IPP
1366																																											PP	PPR
1367																																											PR	PRK
1368																																											RK	RKF
1369																																											KF	KFN
1370																																											FN	FNE
1371																																											NE	NES
1372																																											ES	ESW
1373																																											SW	SWD
1374																																											WD	WDF
1375																																											DF	DFG
1376																																											FG	FGN
1377																																											GN	GNC
1378																																											NC	NCQ
1379																																											CQ	CQI
1380																																											QI	QIA
1381																																											IA	IAT
1382																																											AT	ATC
1383																																											TC	TCL
1384																																											CL	CLG
1385																																											LG	LGE
1386																																											GE	GEE
1387																																											EE	EEN
1388																																											EN	ENN
1389																																											NN	NNI
1390																																											NI	NIK
1391																																											IK	IKL
1392																																											KL	KLS
1393																																											LS	LSS
1394																																											SS	SSI
1395																																											SI	SIT
1396																																											IT	ITC
1397																																											TC	TCP
1398																																											CP	CPP
1399																																											PP	PPQ
1400																																											PQ	PQQ
1401																																											QQ	QQL
1402																																											QL	QLK
1403																																											LK	LKL
1404																																											KL	KLC
1405																																											LC	LCV
1406																																											CV	CVN
1407																																											VN	VNG
1408																																											NG	NGF
1409																																											GF	GFP
1410																																											FP	FPF
1411																																											PF	PFM
1412																																											FM	FMK
1413																																											MK	MKH
1414																																											KH	KHH
1415																																											HH	HHD
1416																																											HD	HDE
1417																																											DE	DET
1418																																											ET	ETG
1419																																											TG	TGC
1420																																											GC	GCC
1421																																											CC	CCE
1422																																											CE	CEV
1423																																											EV	EVF
1424																																											VF	VFE
1425																																											FE	FEC
1426																																											EC	ECQ
1427																																											CQ	CQC
1428																																											QC	QCI
1429																																											CI	CIC
1430																																											IC	ICS
1431																																											CS	CSG
1432																																											SG	SGW
1433																																											GW	GWG
1434																																											WG	WGN
1435																																											GN	GNE
1436																																											NE	NEH
1437																																											EH	EHY
1438																																											HY	HYV
1439																																											YV	YVT
1440																																											VT	VTF
1441																																											TF	TFD
1442																																											FD	FDG
1443																																											DG	DGT
1444																																											GT	GTY
1445																																											TY	TYY
1446																																											YY	YYH
1447																																											YH	YHF
1448																																											HF	HFK
1449																																											FK	FKE
1450																																											KE	KEN
1451																																											EN	ENC
1452																																											NC	NCT
1453																																											CT	CTY
1454																																											TY	TYV
1455																																											YV	YVL
1456																																											VL	VLV
1457																																											LV	LVE
1458																																											VE	VEL
1459																																											EL	ELI
1460																																											LI	LIQ
1461																																											IQ	IQP
1462																																											QP	QPS
1463																																											PS	PSS
1464																																											SS	SSE
1465																																											SE	SEK
1466																																											EK	EKF
1467																																											KF	KFW
1468																																											FW	FWI
1469																																											WI	WIH
1470																																											IH	IHI
1471																																											HI	HID
1472																																											ID	IDN
1473																																											DN	DNY
1474																																											NY	NYY
1475																																											YY	YYC
1476																																											YC	YCG
1477																																											CG	CGA
1478																																											GA	GAA
1479																																											AA	AAD
1480																																											AD	ADG
1481																																											DG	DGA
1482																																											GA	GAI
1483																																											AI	AIC
1484																																											IC	ICS
1485																																											CS	CSM
1486																																											SM	SMS
1487																																											MS	MSL
1488																																											SL	SLL
1489																																											LL	LLI
1490																																											LI	LIF
1491																																											IF	IFH
1492																																											FH	FHS
1493																																											HS	HSN
1494																																											SN	SNS
1495																																											NS	NSL
1496																																											SL	SLV
1497																																											LV	LVI
1498																																											VI	VIL
1499																																											IL	ILT
1500																																											LT	LTQ
1501																																											TQ	TQA
1502																																											QA	QAK
1503																																											AK	AKE
1504																																											KE	KEH
1505																																											EH	EHG
1506																																											HG	HGK
1507																																											GK	GKG
1508																																											KG	KGT
1509																																											GT	GTN
1510																																											TN	TNL
1511																																											NL	NLV
1512																																											LV	LVL
1513																																											VL	VLF
1514																																											LF	LFN
1515																																											FN	FND
1516																																											ND	NDK
1517																																											DK	DKK
1518																																											KK	KKV
1519																																											KV	KVV
1520																																											VV	VVP
1521																																											VP	VPD
1522																																											PD	PDI
1523																																											DI	DIS
1524																																											IS	ISK
1525																																											SK	SKN
1526																																											KN	KNG
1527																																											NG	NGI
1528																																											GI	GIR
1529																																											IR	IRI
1530																																											RI	RIT
1531																																											IT	ITS
1532																																											TS	TSS
1533																																											SS	SSG
1534																																											SG	SGL
1535																																											GL	GLY
1536																																											LY	LYI
1537																																											YI	YII
1538																																											II	IIV
1539																																											IV	IVE
1540																																											VE	VEI
1541																																											EI	EIP
1542																																											IP	IPE
1543																																											PE	PEL
1544																																											EL	ELE
1545																																											LE	LEV
1546																																											EV	EVY
1547																																											VY	VYV
1548																																											YV	YVS
1549																																											VS	VSY
1550																																											SY	SYS
1551																																											YS	YSR
1552																																											SR	SRL
1553																																											RL	RLA
1554																																											LA	LAF
1555																																											AF	AFY
1556																																											FY	FYI
1557																																											YI	YIK
1558																																											IK	IKL
1559																																											KL	KLP
1560																																											LP	LPF
1561																																											PF	PFG
1562																																											FG	FGK
1563																																											GK	GKY
1564																																											KY	KYY
1565																																											YY	YYN
1566																																											YN	YNN
1567																																											NN	NNT
1568																																											NT	NTM
1569																																											TM	TMG
1570																																											MG	MGL
1571																																											GL	GLC
1572																																											LC	LCG
1573																																											CG	CGT
1574																																											GT	GTC
1575																																											TC	TCT
1576																																											CT	CTN
1577																																											TN	TNQ
1578																																											NQ	NQK
1579																																											QK	QKS
1580																																											KS	KSD
1581																																											SD	SDD
1582																																											DD	DDA
1583																																											DA	DAR
1584																																											AR	ARK
1585																																											RK	RKR
1586																																											KR	KRN
1587																																											RN	RNG
1588																																											NG	NGE
1589																																											GE	GEV
1590																																											EV	EVT
1591																																											VT	VTD
1592																																											TD	TDS
1593																																											DS	DSF
1594																																											SF	SFK
1595																																											FK	FKE
1596																																											KE	KEM
1597																																											EM	EMA
1598																																											MA	MAL
1599																																											AL	ALD
1600																																											LD	LDW
1601																																											DW	DWK
1602																																											WK	WKA
1603																																											KA	KAP
1604																																											AP	APV
1605																																											PV	PVS
1606																																											VS	VST
1607																																											ST	STN
1608																																											TN	TNR
1609																																											NR	NRY
1610																																											RY	RYC
1611																																											YC	YCN
1612																																											CN	CNP
1613																																											NP	NPG
1614																																											PG	PGI
1615																																											GI	GIS
1616																																											IS	ISE
1617																																											SE	SEP
1618																																											EP	EPV
1619																																											PV	PVK
1620																																											VK	VKI
1621																																											KI	KIE
1622																																											IE	IEN
1623																																											EN	ENY
1624																																											NY	NYQ
1625																																											YQ	YQH
1626																																											QH	QHC
1627																																											HC	HCE
1628																																											CE	CEP
1629																																											EP	EPS
1630																																											PS	PSE
1631																																											SE	SEL
1632																																											EL	ELC
1633																																											LC	LCK
1634																																											CK	CKI
1635																																											KI	KII
1636																																											II	IIW
1637																																											IW	IWN
1638																																											WN	WNL
1639																																											NL	NLT
1640																																											LT	LTE
1641																																											TE	TEC
1642																																											EC	ECH
1643																																											CH	CHR
1644																																											HR	HRV
1645																																											RV	RVV
1646																																											VV	VVP
1647																																											VP	VPP
1648																																											PP	PPQ
1649																																											PQ	PQP
1650																																											QP	QPY
1651																																											PY	PYY
1652																																											YY	YYE
1653																																											YE	YEA
1654																																											EA	EAC
1655																																											AC	ACV
1656																																											CV	CVA
1657																																											VA	VAS
1658																																											AS	ASR
1659																																											SR	SRC
1660																																											RC	RCS
1661																																											CS	CSQ
1662																																											SQ	SQQ
1663																																											QQ	QQH
1664																																											QH	QHP
1665																																											HP	HPS
1666																																											PS	PST
1667																																											ST	STE
1668																																											TE	TEC
1669																																											EC	ECQ
1670																																											CQ	CQS
1671																																											QS	QSM
1672																																											SM	SMQ
1673																																											MQ	MQT
1674																																											QT	QTY
1675																																											TY	TYA
1676																																											YA	YAA
1677																																											AA	AAL
1678																																											AL	ALC
1679																																											LC	LCG
1680																																											CG	CGL
1681																																											GL	GLH
1682																																											LH	LHG
1683																																											HG	HGI
1684																																											GI	GIC
1685																																											IC	ICV
1686																																											CV	CVD
1687																																											VD	VDW
1688																																											DW	DWR
1689																																											WR	WRG
1690																																											RG	RGQ
1691																																											GQ	GQT
1692																																											QT	QTN
1693																																											TN	TNG
1694																																											NG	NGQ
1695																																											GQ	GQC
1696																																											QC	QCE
1697																																											CE	CEA
1698																																											EA	EAT
1699																																											AT	ATC
1700																																											TC	TCA
1701																																											CA	CAR
1702																																											AR	ARD
1703																																											RD	RDQ
1704																																											DQ	DQV
1705																																											QV	QVY
1706																																											VY	VYK
1707																																											YK	YKP
1708																																											KP	KPC
1709																																											PC	PCG
1710																																											CG	CGE
1711																																											GE	GEA
1712																																											EA	EAK
1713																																											AK	AKR
1714																																											KR	KRN
1715																																											RN	RNT
1716																																											NT	NTC
1717																																											TC	TCF
1718																																											CF	CFS
1719																																											FS	FSR
1720																																											SR	SRE
1721																																											RE	REV
1722																																											EV	EVI
1723																																											VI	VIV
1724																																											IV	IVD
1725																																											VD	VDT
1726																																											DT	DTL
1727																																											TL	TLL
1728																																											LL	LLS
1729																																											LS	LSR
1730																																											SR	SRN
1731																																											RN	RNN
1732																																											NN	NNT
1733																																											NT	NTP
1734																																											TP	TPV
1735																																											PV	PVF
1736																																											VF	VFV
1737																																											FV	FVE
1738																																											VE	VEG
1739																																											EG	EGC
1740																																											GC	GCY
1741																																											CY	CYC
1742																																											YC	YCP
1743																																											CP	CPD
1744																																											PD	PDG
1745																																											DG	DGN
1746																																											GN	GNI
1747																																											NI	NIL
1748																																											IL	ILL
1749																																											LL	LLN
1750																																											LN	LNE
1751																																											NE	NEH
1752																																											EH	EHD
1753																																											HD	HDG
1754																																											DG	DGI
1755																																											GI	GIC
1756																																											IC	ICV
1757																																											CV	CVS
1758																																											VS	VSV
1759																																											SV	SVC
1760																																											VC	VCG
1761																																											CG	CGC
1762																																											GC	GCT
1763																																											CT	CTA
1764																																											TA	TAQ
1765																																											AQ	AQD
1766																																											QD	QDG
1767																																											DG	DGS
1768																																											GS	GSV
1769																																											SV	SVK
1770																																											VK	VKK
1771																																											KK	KKP
1772																																											KP	KPR
1773																																											PR	PRE
1774																																											RE	REA
1775																																											EA	EAW
1776																																											AW	AWE
1777																																											WE	WEH
1778																																											EH	EHD
1779																																											HD	HDC
1780																																											DC	DCQ
1781																																											CQ	CQY
1782																																											QY	QYC
1783																																											YC	YCT
1784																																											CT	CTC
1785																																											TC	TCD
1786																																											CD	CDE
1787																																											DE	DEE
1788																																											EE	EET
1789																																											ET	ETL
1790																																											TL	TLN
1791																																											LN	LNI
1792																																											NI	NIS
1793																																											IS	ISC
1794																																											SC	SCF
1795																																											CF	CFP
1796																																											FP	FPR
1797																																											PR	PRP
1798																																											RP	RPC
1799																																											PC	PCA
1800																																											CA	CAK
1801																																											AK	AKS
1802																																											KS	KSP
1803																																											SP	SPP
1804																																											PP	PPI
1805																																											PI	PIN
1806																																											IN	INC
1807																																											NC	NCT
1808																																											CT	CTK
1809																																											TK	TKE
1810																																											KE	KEG
1811																																											EG	EGF
1812																																											GF	GFV
1813																																											FV	FVR
1814																																											VR	VRK
1815																																											RK	RKI
1816																																											KI	KIK
1817																																											IK	IKP
1818																																											KP	KPR
1819																																											PR	PRL
1820																																											RL	RLD
1821																																											LD	LDD
1822																																											DD	DDP
1823																																											DP	DPC
1824																																											PC	PCC
1825																																											CC	CCT
1826																																											CT	CTE
1827																																											TE	TET
1828																																											ET	ETV
1829																																											TV	TVC
1830																																											VC	VCE
1831																																											CE	CEC
1832																																											EC	ECD
1833																																											CD	CDI
1834																																											DI	DIK
1835																																											IK	IKT
1836																																											KT	KTC
1837																																											TC	TCI
1838																																											CI	CII
1839																																											II	IIN
1840																																											IN	INK
1841																																											NK	NKT
1842																																											KT	KTA
1843																																											TA	TAC
1844																																											AC	ACD
1845																																											CD	CDL
1846																																											DL	DLG
1847																																											LG	LGF
1848																																											GF	GFQ
1849																																											FQ	FQP
1850																																											QP	QPV
1851																																											PV	PVV
1852																																											VV	VVA
1853																																											VA	VAI
1854																																											AI	AIS
1855																																											IS	ISE
1856																																											SE	SED
1857																																											ED	EDG
1858																																											DG	DGC
1859																																											GC	GCC
1860																																											CC	CCP
1861																																											CP	CPI
1862																																											PI	PIF
1863																																											IF	IFS
1864																																											FS	FSC
1865																																											SC	SCI
1866																																											CI	CIP
1867																																											IP	IPK
1868																																											PK	PKG
1869																																											KG	KGV
1870																																											GV	GVC
1871																																											VC	VCV
1872																																											CV	CVS
1873																																											VS	VSE
1874																																											SE	SEG
1875																																											EG	EGV
1876																																											GV	GVE
1877																																											VE	VEF
1878																																											EF	EFK
1879																																											FK	FKP
1880																																											KP	KPG
1881																																											PG	PGA
1882																																											GA	GAV
1883																																											AV	AVV
1884																																											VV	VVP
1885																																											VP	VPK
1886																																											PK	PKS
1887																																											KS	KSS
1888																																											SS	SSC
1889																																											SC	SCE
1890																																											CE	CED
1891																																											ED	EDC
1892																																											DC	DCV
1893																																											CV	CVC
1894																																											VC	VCT
1895																																											CT	CTD
1896																																											TD	TDE
1897																																											DE	DEQ
1898																																											EQ	EQD
1899																																											QD	QDA
1900																																											DA	DAV
1901																																											AV	AVT
1902																																											VT	VTG
1903																																											TG	TGT
1904																																											GT	GTN
1905																																											TN	TNR
1906																																											NR	NRI
1907																																											RI	RIQ
1908																																											IQ	IQC
1909																																											QC	QCV
1910																																											CV	CVP
1911																																											VP	VPV
1912																																											PV	PVK
1913																																											VK	VKC
1914																																											KC	KCQ
1915																																											CQ	CQT
1916																																											QT	QTT
1917																																											TT	TTC
1918																																											TC	TCQ
1919																																											CQ	CQQ
1920																																											QQ	QQG
1921																																											QG	QGF
1922																																											GF	GFR
1923																																											FR	FRY
1924																																											RY	RYV
1925																																											YV	YVE
1926																																											VE	VEK
1927																																											EK	EKE
1928																																											KE	KEG
1929																																											EG	EGQ
1930																																											GQ	GQC
1931																																											QC	QCC
1932																																											CC	CCS
1933																																											CS	CSQ
1934																																											SQ	SQC
1935																																											QC	QCQ
1936																																											CQ	CQQ
1937																																											QQ	QQV
1938																																											QV	QVA
1939																																											VA	VAC
1940																																											AC	ACV
1941																																											CV	CVA
1942																																											VA	VAN
1943																																											AN	ANF
1944																																											NF	NFP
1945																																											FP	FPF
1946																																											PF	PFG
1947																																											FG	FGS
1948																																											GS	GSV
1949																																											SV	SVT
1950																																											VT	VTI
1951																																											TI	TIE
1952																																											IE	IEV
1953																																											EV	EVG
1954																																											VG	VGK
1955																																											GK	GKS
1956																																											KS	KSY
1957																																											SY	SYK
1958																																											YK	YKA
1959																																											KA	KAP
1960																																											AP	APY
1961																																											PY	PYD
1962																																											YD	YDN
1963																																											DN	DNC
1964																																											NC	NCT
1965																																											CT	CTQ
1966																																											TQ	TQY
1967																																											QY	QYT
1968																																											YT	YTC
1969																																											TC	TCT
1970																																											CT	CTE
1971																																											TE	TES
1972																																											ES	ESG
1973																																											SG	SGG
1974																																											GG	GGQ
1975																																											GQ	GQF
1976																																											QF	QFS
1977																																											FS	FSL
1978																																											SL	SLT
1979																																											LT	LTS
1980																																											TS	TST
1981																																											ST	STV
1982																																											TV	TVK
1983																																											VK	VKV
1984																																											KV	KVC
1985																																											VC	VCL
1986																																											CL	CLP
1987																																											LP	LPF
1988																																											PF	PFE
1989																																											FE	FEE
1990																																											EE	EES
1991																																											ES	ESN
1992																																											SN	SNC
1993																																											NC	NCV
1994																																											CV	CVP
1995																																											VP	VPG
1996																																											PG	PGT
[truncated: 111 more rows]
[truncated: 43 more columns]
